# Supplementary material for: A bifunctional Pasteurella multocida β1–3-galactosyl/N-acetylgalactosaminyltransferase (PmNatB) for the highly efficient chemoenzymatic synthesis of disaccharides
Source: Royal Society of Chemistry journal article supplement (doi:10.1039/d4ob00889h), 2024-01-01

## Supplementary Information

### A Bifunctional *Pasteurella multocida* $\beta$ 1–3-Galactosyl/N-Acetylgalactosaminyltransferase (PmNatB) for Highly Efficient Chemoenzymatic Synthesis of Disaccharides

Xiaohong Yang,<sup>a,†</sup> Bijoyananda Mishra,<sup>a,†</sup> Hai Yu,<sup>\*a</sup> Yijun Wei,<sup>b,c</sup> and Xi Chen<sup>\*a</sup>

<sup>a</sup>Department of Chemistry, <sup>b</sup>Department of Neurobiology, Physiology and Behavior, <sup>c</sup>Department of Statistics, University of California, One Shields Avenue, Davis, California, USA

<sup>†</sup>These authors contributed equally to this work.

\*Corresponding authors: [hyu@ucdavis.edu](mailto:hyu@ucdavis.edu) and [xiichen@ucdavis.edu](mailto:xiichen@ucdavis.edu)

#### Table of Contents

|                                                                                                                                                                                                                                                                                                                                                                                                           |        |
|-----------------------------------------------------------------------------------------------------------------------------------------------------------------------------------------------------------------------------------------------------------------------------------------------------------------------------------------------------------------------------------------------------------|--------|
| <b>Table S1.</b> Results for high-resolution mass spectrometry (HRMS)-based determination of the multifunctionality of His <sub>6</sub> -PmNatB.....                                                                                                                                                                                                                                                      | S2     |
| <b>Table S2.</b> <sup>13</sup> C NMR chemical shifts of <b>1a/b–4a/b</b> .....                                                                                                                                                                                                                                                                                                                            | S3     |
| <b>Table S3.</b> <sup>1</sup> H NMR chemical shifts and coupling constants for anomeric hydrogens of monosaccharides in the disaccharides <b>3a/b</b> and <b>4a/b</b> .....                                                                                                                                                                                                                               | S4     |
| <b>Figure S1.</b> Amino acid sequence alignment ( <b>a</b> ) and sequence identity and similarity ( <b>b</b> ) of PmNatB and several other CAZy GT2 family enzymes.....                                                                                                                                                                                                                                   | S5     |
| <b>Figure S2.</b> DNA and amino acid sequences of His <sub>6</sub> -PmNatB.....                                                                                                                                                                                                                                                                                                                           | S6     |
| <b>Figure S3.</b> SDS-PAGE analyses for expression and purification of His <sub>6</sub> -PmNatB ( <b>a</b> ) and single-site mutants D95A, D97A, and D194A ( <b>b</b> ).....                                                                                                                                                                                                                              | S7     |
| <b>Figure S4.</b> Biochemical characterization of His <sub>6</sub> -PmNatB regarding pH profile ( <b>a</b> ); temperature profile ( <b>b</b> ); effects of divalent metal cations, EDTA, and DTT ( <b>c</b> ); Mg <sup>2+</sup> concentration effect ( <b>d</b> ); thermostability ( <b>e</b> ); and time course studie of GalT ( <b>f</b> ) and GalNAcT ( <b>g</b> ) activities at 30 °C and 35 °C ..... | S8     |
| <sup>1</sup> H, <sup>13</sup> C, <sup>1</sup> H- <sup>1</sup> H COSY, and <sup>1</sup> H- <sup>13</sup> C HSQC NMR spectra of glycosides <b>1a/b–4a/b</b> .....                                                                                                                                                                                                                                           | S9–S40 |

**Table S1.** Results for high-resolution mass spectrometry (HRMS)-based determination of the multifunctionality of His<sub>6</sub>-PmNatB.<sup>[a]</sup>

| Potential Acceptors                                                                                        | Potential Donors                                                   |                       |                                                                    |                       |
|------------------------------------------------------------------------------------------------------------|--------------------------------------------------------------------|-----------------------|--------------------------------------------------------------------|-----------------------|
|                                                                                                            | UDP-Gal/UDP-Glc                                                    |                       | UDP-GalNAc/UDP-GlcNAc                                              |                       |
|                                                                                                            | Expected <i>m/z</i>                                                | Observed              | Expected <i>m/z</i>                                                | Observed              |
| Lactose                                                                                                    | 505.1762 (+H)<br>527.1582 (+Na)<br>503.1617 (-H)<br>539.1384 (+Cl) | No                    | 546.2028 (+H)<br>568.1848 (+Na)<br>544.1883 (-H)<br>580.1650 (+Cl) | No                    |
| GalNAc $\alpha$ ProNHCBz<br>GalNAc $\beta$ ProNHCBz<br>GlcNAc $\alpha$ ProNHCBz<br>GlcNAc $\beta$ ProNHCBz | 575.2776 (+H)<br>597.2266 (+Na)<br>573.2301 (-H)<br>609.2068 (+Cl) | <b>Yes (609.2068)</b> | 616.2711 (+H)<br>638.2531 (+Na)<br>614.2566 (-H)<br>650.2333 (+Cl) | No                    |
| GlcNAc $\alpha$ ProCl                                                                                      | 460.1579 (+H)<br>482.1399 (+Na)<br>458.1434 (-H)<br>494.1201 (+Cl) | No                    | 501.1845 (+H)<br>523.1665 (+Na)<br>499.1700 (-H)<br>535.1467 (+Cl) | No                    |
| Gal $\alpha$ pNP<br>Gal $\beta$ pNP<br>Glc $\alpha$ pNP                                                    | 464.1398 (+H)<br>486.1218 (+Na)<br>462.1253 (-H)<br>498.1020 (+Cl) | No                    | 505.1663 (+H)<br>527.1483 (+Na)<br>503.1518 (-H)<br>539.1285 (+Cl) | <b>Yes (539.1269)</b> |
| GlcA $\beta$ pNP                                                                                           | 476.1046 (-H)                                                      | No                    | 517.1311 (-H)                                                      | No                    |

<sup>[a]</sup> Reactions were carried out at 30 °C with a mixture of four UDP-sugars as potential donors (5 mM each) and ten glycosides as potential acceptors (1 mM each) for 0.5 h and 20 h, respectively. Same outcomes were obtained at both reaction time points.

**Table S2.**  $^{13}\text{C}$  NMR chemical shifts of **1a/b–4a/b**.

| Residue                | Carbon atom                                            | Chemical shift (ppm)                                |                                                     |
|------------------------|--------------------------------------------------------|-----------------------------------------------------|-----------------------------------------------------|
|                        |                                                        | GalNAc $\alpha$ ProNHCbz ( <b>1a</b> )              | Gal $\beta$ 3GalNAc $\alpha$ ProNHCbz ( <b>3a</b> ) |
| $\alpha$ -D-GalNAc     | <b>C</b>                                               |                                                     |                                                     |
|                        | 1                                                      | 96.9                                                | 97.1                                                |
|                        | 2                                                      | 49.9                                                | 48.6                                                |
|                        | <b>3</b>                                               | <b>68.5</b>                                         | <b>77.4</b>                                         |
|                        | 4                                                      | 67.7                                                | 68.8                                                |
|                        | 5                                                      | 70.8                                                | 70.6                                                |
|                        | 6                                                      | 61.2                                                | 61.2                                                |
|                        | C=O<br>CH <sub>3</sub>                                 | 174.5<br>21.9                                       | 174.5<br>22.0                                       |
| $\beta$ -D-Gal (1-3)   | 1                                                      |                                                     | 104.7                                               |
|                        | 2                                                      |                                                     | 70.6                                                |
|                        | 3                                                      |                                                     | 72.5                                                |
|                        | 4                                                      |                                                     | 68.5                                                |
|                        | 5                                                      |                                                     | 74.9                                                |
|                        | 6                                                      |                                                     | 60.9                                                |
| ProNHCbz               | OCH <sub>2</sub> CH <sub>2</sub> CH <sub>2</sub> NHCbz | 65.0                                                | 65.0                                                |
|                        | OCH <sub>2</sub> CH <sub>2</sub> CH <sub>2</sub> NHCbz | 28.4                                                | 28.5                                                |
|                        | OCH <sub>2</sub> CH <sub>2</sub> CH <sub>2</sub> NHCbz | 37.5                                                | 37.5                                                |
|                        | PhCH <sub>2</sub> O-                                   | 66.7                                                | 66.7                                                |
| <b>C</b>               | GalNAc $\beta$ ProNHCbz ( <b>1b</b> )                  | Gal $\beta$ 3GalNAc $\beta$ ProNHCbz ( <b>3b</b> )  |                                                     |
| $\beta$ -D-GalNAc      | <b>C</b>                                               |                                                     |                                                     |
|                        | 1                                                      | 101.6                                               | 101.4                                               |
|                        | 2                                                      | 52.4                                                | 51.3                                                |
|                        | <b>3</b>                                               | <b>71.0</b>                                         | <b>79.9</b>                                         |
|                        | 4                                                      | 67.8                                                | 68.0                                                |
|                        | 5                                                      | 75.1                                                | 75.0                                                |
|                        | 6                                                      | 60.9                                                | 61.0                                                |
|                        | C=O<br>CH <sub>3</sub>                                 | 174.7<br>22.1                                       | 174.7<br>22.2                                       |
| $\beta$ -D-Gal (1-3)   | 1                                                      |                                                     | 104.8                                               |
|                        | 2                                                      |                                                     | 70.6                                                |
|                        | 3                                                      |                                                     | 72.5                                                |
|                        | 4                                                      |                                                     | 68.6                                                |
|                        | 5                                                      |                                                     | 74.7                                                |
|                        | 6                                                      |                                                     | 60.9                                                |
| ProNHCbz               | OCH <sub>2</sub> CH <sub>2</sub> CH <sub>2</sub> NHCbz | 66.8                                                | 66.8                                                |
|                        | OCH <sub>2</sub> CH <sub>2</sub> CH <sub>2</sub> NHCbz | 28.8                                                | 28.8                                                |
|                        | OCH <sub>2</sub> CH <sub>2</sub> CH <sub>2</sub> NHCbz | 37.2                                                | 37.2                                                |
|                        | PhCH <sub>2</sub> O-                                   | 67.5                                                | 67.5                                                |
| <b>C</b>               | Gal $\alpha$ ProNHCbz ( <b>2a</b> )                    | GalNAc $\beta$ 3Gal $\alpha$ ProNHCbz ( <b>4a</b> ) |                                                     |
| $\alpha$ -D-Gal        | <b>C</b>                                               |                                                     |                                                     |
|                        | 1                                                      | 98.2                                                | 98.4                                                |
|                        | 2                                                      | 69.2                                                | 69.2                                                |
|                        | <b>3</b>                                               | <b>69.5</b>                                         | <b>79.1</b>                                         |
|                        | 4                                                      | 68.3                                                | 67.7                                                |
|                        | 5                                                      | 70.9                                                | 70.8                                                |
| 6                      | 61.2                                                   | 61.1                                                |                                                     |
| $\beta$ -D-GalNAc(1-3) | <b>C</b>                                               |                                                     |                                                     |
|                        | 1                                                      |                                                     | 103.1                                               |
|                        | 2                                                      |                                                     | 52.6                                                |
|                        | 3                                                      |                                                     | 70.4                                                |
|                        | 4                                                      |                                                     | 67.3                                                |
|                        | 5                                                      |                                                     | 74.9                                                |
|                        | 6                                                      |                                                     | 60.9                                                |
|                        | C=O<br>CH <sub>3</sub>                                 |                                                     | 175.2<br>22.2                                       |
| ProNHCbz               | OCH <sub>2</sub> CH <sub>2</sub> CH <sub>2</sub> NHCbz | 65.4                                                | 65.2                                                |
|                        | OCH <sub>2</sub> CH <sub>2</sub> CH <sub>2</sub> NHCbz | 28.5                                                | 28.5                                                |
|                        | OCH <sub>2</sub> CH <sub>2</sub> CH <sub>2</sub> NHCbz | 37.7                                                | 37.6                                                |
|                        | PhCH <sub>2</sub> O-                                   | 66.8                                                | 66.7                                                |
| <b>C</b>               | Gal $\beta$ ProNHCbz ( <b>2b</b> )                     | GalNAc $\beta$ 3Gal $\beta$ ProNHCbz ( <b>4b</b> )  |                                                     |
| $\beta$ -D-Gal         | <b>C</b>                                               |                                                     |                                                     |
|                        | 1                                                      | 102.8                                               | 102.8                                               |
|                        | 2                                                      | 70.7                                                | 70.8                                                |
|                        | <b>3</b>                                               | <b>72.8</b>                                         | <b>82.0</b>                                         |
|                        | 4                                                      | 68.6                                                | 68.4                                                |
|                        | 5                                                      | 75.1                                                | 75.0                                                |
| 6                      | 60.9                                                   | 60.8                                                |                                                     |
| $\beta$ -D-GalNAc(1-3) | <b>C</b>                                               |                                                     |                                                     |
|                        | 1                                                      |                                                     | 103.2                                               |
|                        | 2                                                      |                                                     | 52.6                                                |
|                        | 3                                                      |                                                     | 69.9                                                |
|                        | 4                                                      |                                                     | 67.8                                                |
|                        | 5                                                      |                                                     | 74.6                                                |
|                        | 6                                                      |                                                     | 61.0                                                |
|                        | C=O<br>CH <sub>3</sub>                                 |                                                     | 175.2<br>22.3                                       |
| ProNHCbz               | OCH <sub>2</sub> CH <sub>2</sub> CH <sub>2</sub> NHCbz | 66.8                                                | 66.8                                                |
|                        | OCH <sub>2</sub> CH <sub>2</sub> CH <sub>2</sub> NHCbz | 28.9                                                | 28.8                                                |
|                        | OCH <sub>2</sub> CH <sub>2</sub> CH <sub>2</sub> NHCbz | 37.3                                                | 37.3                                                |
|                        | PhCH <sub>2</sub> O-                                   | 67.6                                                | 67.6                                                |

**Table S3.** <sup>1</sup>H NMR chemical shifts and coupling constants for anomeric hydrogens of monosaccharides in the disaccharides **3a/b** and **4a/b**.

| Disaccharide                       | Chemical shift (ppm) ( <i>J</i> coupling constant Hz) |            |            |            |
|------------------------------------|-------------------------------------------------------|------------|------------|------------|
|                                    | β-D-Gal                                               | α-D-GalNAc | β-D-GalNAc | α-D-Gal    |
| Galβ3GalNAcαProNHCbz ( <b>3a</b> ) | 4.43 (7.7)                                            | 4.82 (3.8) |            |            |
| Galβ3GalNAcβProNHCbz ( <b>3b</b> ) | 4.44 (7.9)                                            |            | 4.44 (7.9) |            |
| GalNAcβ3GalαProNHCbz ( <b>4a</b> ) |                                                       |            | 4.57 (8.4) | 4.85 (3.6) |
| GalNAcβ3GalβProNHCbz ( <b>4b</b> ) | 4.64 (7.9)                                            |            | 4.64 (7.9) |            |

a)

```

PmNatB      MSYLDQPLVSVLICAYNADKYIEECIDAILNQT YKNLEIVVVNDGSTDTT LSKLHYFAEK      60
HiLgtD      --MENCPLVSVIVCAYNAEQYIDESISSIINQTYENLEIIVINDGSTDL T LSHLEEISKL      58
NgLgtD      ---MQPLVSVLICAYNAEKYFAQSLAAVVGQ TWRNLDILIVDDGSTDGT PAIARHFQEQ      56
NmLgtA      ---MQPLVSVLICAYNVEKYFAQSLAAVVNQTWRNLDILIVDDGSTDGT LAIAQRFQEQ      56
          *****:****.:*: :.: :.:**.:**.:*:::***** * : . : :

PmNatB      DPRIKIINNEENKGF IASLNIGISSI-----NGDY LARTDADDITKPEWIEKILGYMLSH      115
HiLgtD      DKRIKIISNKYNLGFINS LNIGLGF-----SGKYFARM DADDIAKPSWIEKIVTYLEKN      113
NgLgtD      DGRIRIISNPRNLGF IASLNIGLDELAKSG-GGEYIARTDADDIASPGWIEKIVGEMEKD      115
NmLgtA      DGRIRILAQPRNSGLIPSLNIGLDELAKSGGGGGEYIARTDADDIAAPDWIEKIVGEMEKD      116
          * **.:* : * *: * *****.: : .*. * .** *****: * *****: : ..

PmNatB      PQI IAMGSYL TILSE DNGSNLANYYEHGDEWRNPLSHREIVEAMLFRNPIHNNSMIVKS      175
HiLgtD      DHITAMGSYLEI IIVEKECGI-IGSQYKTGDIWKNPLLHNDICEAML FYNPIHNNTMIMRA      172
NgLgtD      RSI IAMGAWLEVLSEENKSVLAAIARNGAIWDKPTRHEDIVAVFPFGNPIHNNTMIMRR      175
NmLgtA      RSI IAMGAWLEVLSEEKDNRLARHHEHGKIWKKPTRHEDIADFFPFGNPIHNNTMIMRR      176
          * **.:* * : : * . :. . * * : * * : * : * *****: * : :

PmNatB      TVFREHGLRFDPAYQHTEDYQFWLEVSRLGELANYPESLVYYRLHNTQTSSLHNKYQNL M      235
HiLgtD      NVYREHKLIFNKDYPYAEDYKFWSEVSRLGCLANYPEALVKYRLHGNQTSSVYNHEQNET      232
NgLgtD      SVI-DGGLRFDPAYIHAEDYKFWYEA GKLGRLAYYPEALVKYRFHQDQTSSKYNLQQRR T      234
NmLgtA      SVI-DGGLRYNTERDWAEDYQFWYDVSKLGRLAYYPEALVKYRLHANQVSSKYSIRQHEI      235
          .* : * : : : **.:** :.:** ** ** **.:** ** **.:* * .** :. * .

PmNatB      AKKIRKRAINYYLQDLGIIHRLGEDIFFHDIEKIQAEL--ASLSLLDNCIIKRILYDCYL      293
HiLgtD      AKKIKRENITYYLNKIGIDIKVINSVSLLEIYHVD-----KSNKVLKSILYEMYM      282
NgLgtD      AWKIKEEIRAGYWKAAGIAVGADCL-NYGLLKSTAYALYEKALSGQDIGCLRLFLEYEFL      293
NmLgtA      AQGIQKTARNDFLQSMGFKTRFDSL-EYRQIKAVAYELLEKHLPEEDFELARRFLYQCFK      294
          * *.: : : * : : : : : : : : : : : : : : : : : : : : : : : : : :

PmNatB      SLVDNKLINILYFLRDKN-NSYFN RKQKIKIKRIIRPYKYESVL      337
HiLgtD      SLDKYTITSLLFHIKY-H-LELFDLQNLKIIKKFIRKINVIF--      323
NgLgtD      SLEKYSLTDLLDFLTD RVMRKLFAAPQYRKILKKMLRPWKYRSY-      337
NmLgtA      RTD TLPAGAWLDFAADGRMRRLFTLRQYFGILHRL LKNR-----      333
          * * * * * : : : : : : : : : : : : : : : : : : : : : : : : : :

```

b)

| % identity/similarity | PmNatB | HiLgtD | NgLgtD |
|-----------------------|--------|--------|--------|
| PmNatB                |        |        |        |
| HiLgtD                | 53/69  |        |        |
| NgLgtD                | 47/63  | 46/62  |        |
| NmLgtA                | 47/65  | 42/62  | 66/74  |

**Figure S1.** Amino acid sequence alignment (a) and sequence identity and similarity (b) of PmNatB and several other CAZy GT2 family enzymes including HiLgtD (GenBank accession number AAC23227.1), NgLgtD (GenBank accession number AAA68012.1), and NmLgtA (GenBank accession number AAC44084.1).

1 *M G S S H H H H H S S G L V P R G S H*  
1 ATGGGCAGCAGCCATCATCATCATCACAGCAGCGGCCTGGTGCCGCGGGCAGCCAT  
21 *M L E M S Y L D Q P L V S V L I C A Y N*  
61 ATGCTCGAGATGAGCTATTTGGATCAACCATTAGTTTCGGTATTAATCTGTGCTTATAAT  
41 *A D K Y I E E C I D A I L N Q T Y K N L*  
121 GCAGATAAATACATAGAAGAGTGTATTGACGCGATTTTAAATCAAACATATAAAAATCTA  
61 *E I V V V N D G S T D T T L S K L H Y F*  
181 GAAATAGTTGTTGTGAATGATGGTTCAACAGACACTACTTTGTCAAAGCTTCATTATTTT  
81 *A E K D P R I K I I N N E E N K G F I A*  
241 GCTGAAAAAGATCCTAGAATTAAAATTATTAATAATGAAGAAAATAAGGGTTTCATTGCT  
101 *S L N I G I S S I N G D Y L A R T **D A D***  
301 TCGCTAAATATAGGGATTTCTCTATCAATGGTGATTATTTAGCGCGAACA**GATGCTGAT**  
121 *D I T K P E W I E K I L G Y M L S H P Q*  
361 GATATTACGAAACCTGAATGGATTGAAAAATTTTAGGATATATGTTGTCTCATCCCCAA  
141 *I I A M G S Y L T I L S E D G N G S N L*  
421 ATTATTGCAATGGGATCGTATCTAACTATTTTGTGAGAAGATGGGAATGGGAGTAATTTA  
161 *A N Y Y E H G D E W R N P L S H R E I V*  
481 GCTAATTATTATGAACATGGTGACGAGTGGAGAAATCCTTTAAGTCATAGAGAGATTGTT  
181 *E A M L F R N P I H N N S M I V K S T V*  
541 GAGGCAATGTTATTCCGTAATCCTATTACATAATAACTCGATGATTGAAAAAGTACTGTC  
201 *F R E H G L R F D P A Y Q H T E **D Y Q F***  
601 TTTAGAGAGCATGGATTACGCTTTGATCCTGCTTATCAACATACTGAA**GAT**TACCAATTT  
221 *W L E V S R L G E L A N Y P E S L V Y Y*  
661 TGGTTAGAAGTGAGCCGTTTGGGAGAATTGGCAAATTATCCTGAATCTTTAGTTTATTAT  
241 *R L H N T Q T S S L H N K Y Q N L M A K*  
721 CGTCTACACAATACACAAACTTCTTCTTTACATAATAAATATCAAATCTCATGGCAAAG  
261 *K I R K R A I N Y Y L Q D L G I I H R L*  
781 AAAATTAGAAAAAGAGCGATCAATTATTATTTGCAAGATTTGGGTATTATTCATAGGCTA  
281 *G E D I F F H D I E K I Q A E L A S L S*  
841 GGTGAAGATATATTTTCCATGATATTGAAAAGATTCAGGCAGAACTGGCTAGCTTATCA  
301 *L L D N C I I K R I L Y D C Y L S L V D*  
901 CTTTTAGATAATTGTATTATTAAGAATACTGTATGATTGTTATTTATCATTAGTGGAT  
321 *N K L I N I L Y F L R D K N N S Y F N R*  
961 AATAAATTAATAAATATTCTTTATTTTTGAGAGATAAAAAACAATTCATATTTCAATAGA  
341 *K Q K I K I I K R I I R P Y K Y E S V L*  
1021 AAACAGAAAAATAAGATTATCAAAGAATTATCCGTCCTTATAAATATGAGTCTGTATTG  
361 \*  
1081 TGA

**Figure S2.** DNA and amino acid sequences of His<sub>6</sub>-PmNatB. The sequences shown in italics and underlined are from the vector plasmid. Key catalytic sites are shown in bold and underlined.

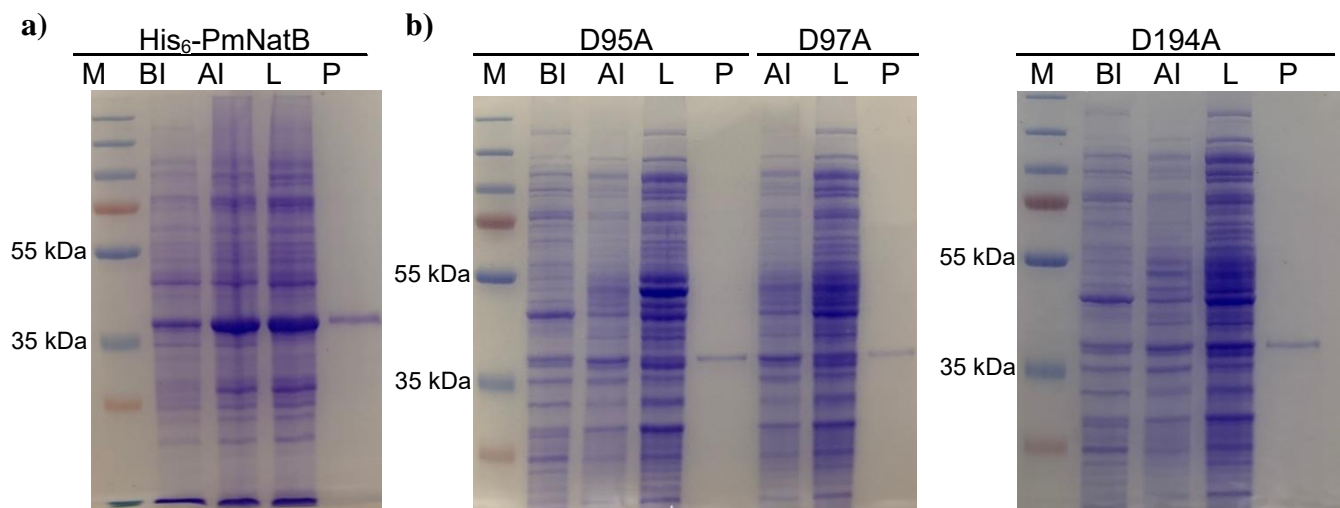

**Figure S3.** SDS-PAGE analyses for expression and purification of His<sub>6</sub>-PmNatB (a) and mutants D95A, D97A, and D194A (b). Lanes: M, Thermo Scientific™ PageRuler™ Plus Prestained Protein Ladder (10–250 kDa); BI, whole cell extract before induction; AI, whole cell extract after induction; L, lysate after induction; P, Ni<sup>2+</sup>-NTA column purified protein.

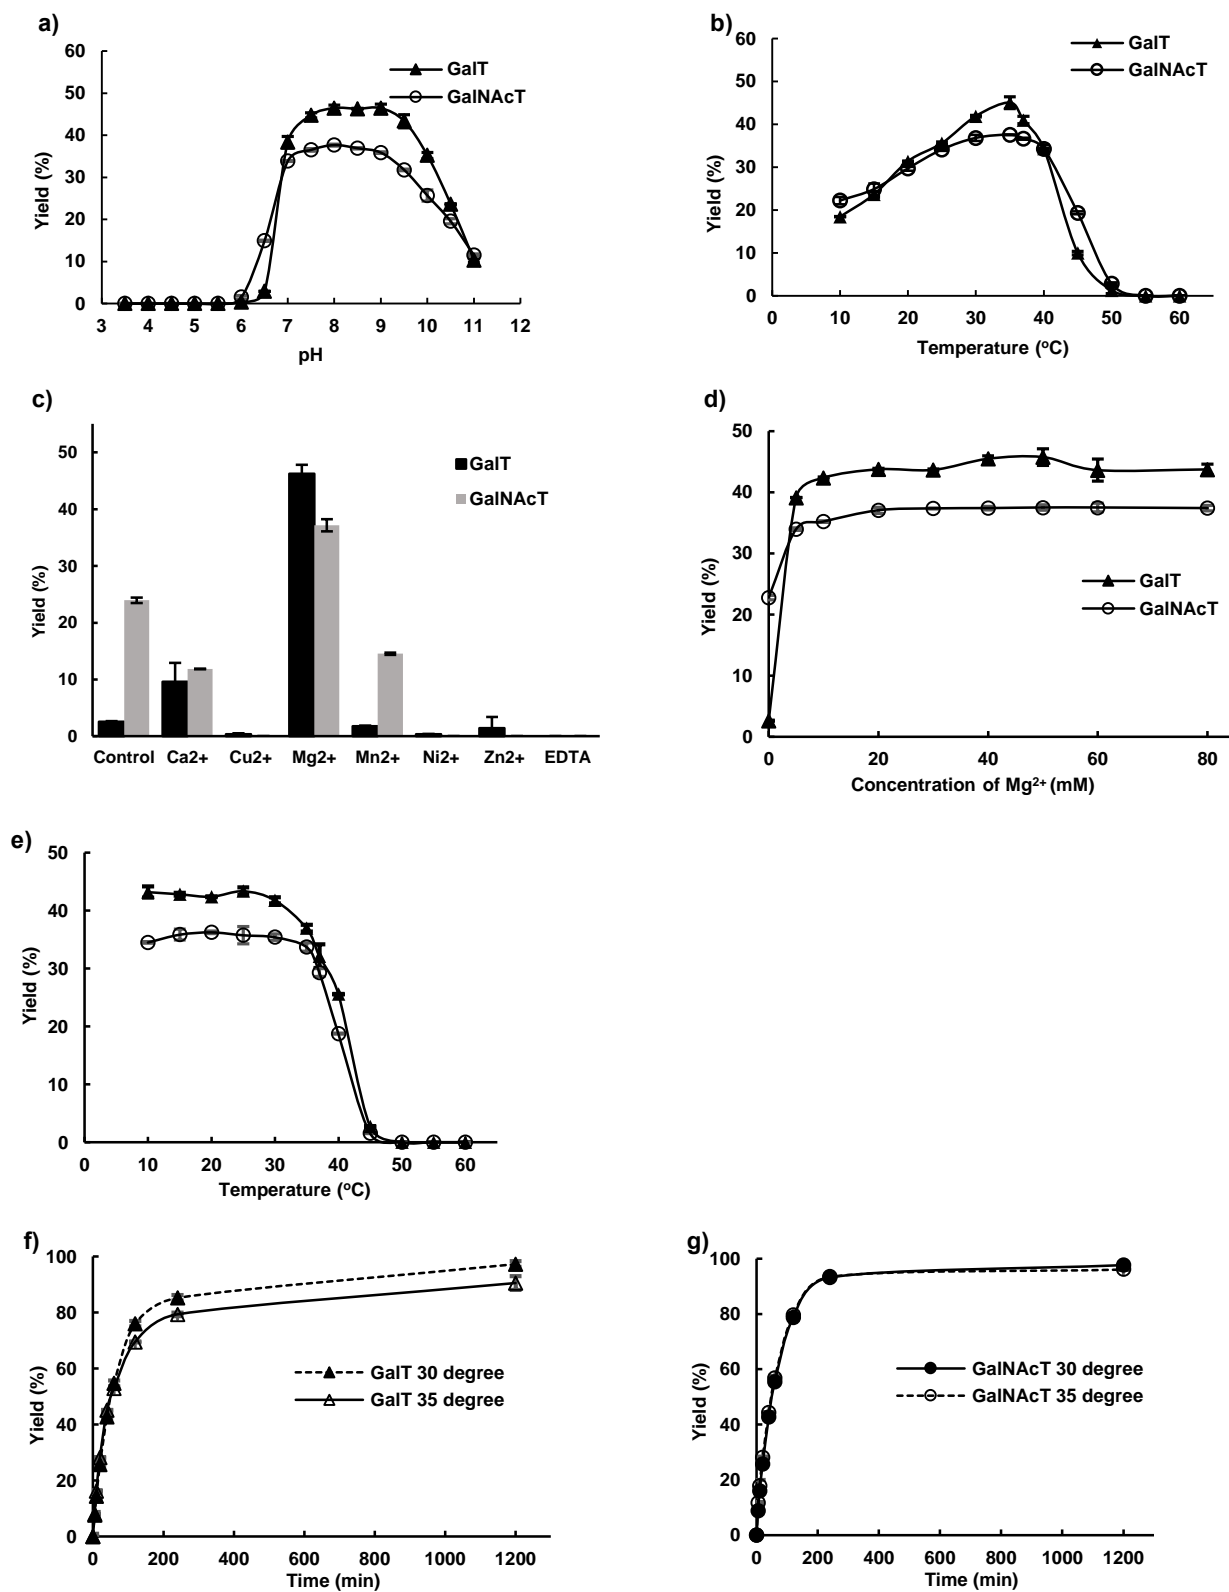

**Figure S4.** Biochemical characterization of His<sub>6</sub>-PmNatB including pH profile (a); temperature profile (b); effects of divalent metal cations and EDTA (c); Mg<sup>2+</sup> concentration effect (d); thermostability (e); and time course studies of GalT (f) and GalNAcT (g) activities at 30 °C and 35 °C.



$^1\text{H}$  NMR Spectra (400 MHz,  $\text{D}_2\text{O}$ ) of GalNAc $\alpha$ ProNHCBz (**1a**)

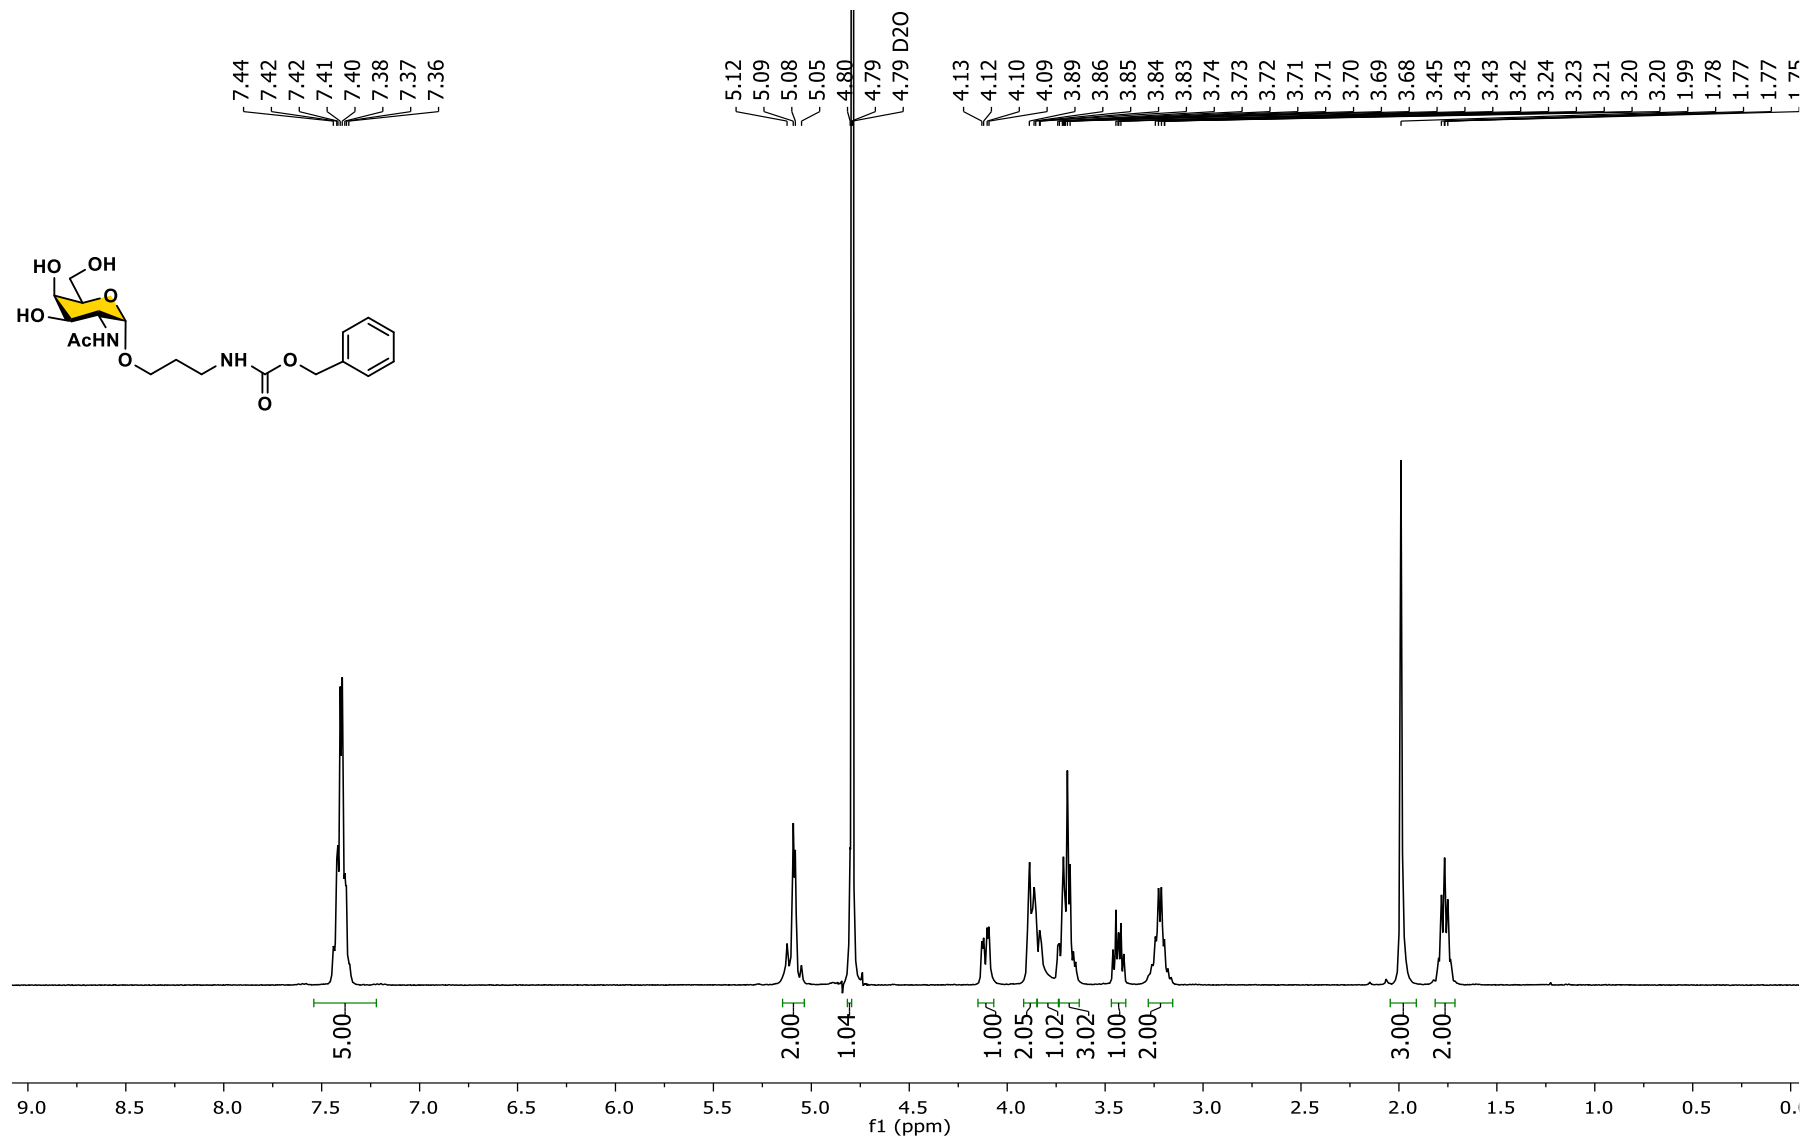

<sup>13</sup>C NMR Spectra (400 MHz, D<sub>2</sub>O) of GalNAcαProNHCbz (**1a**)

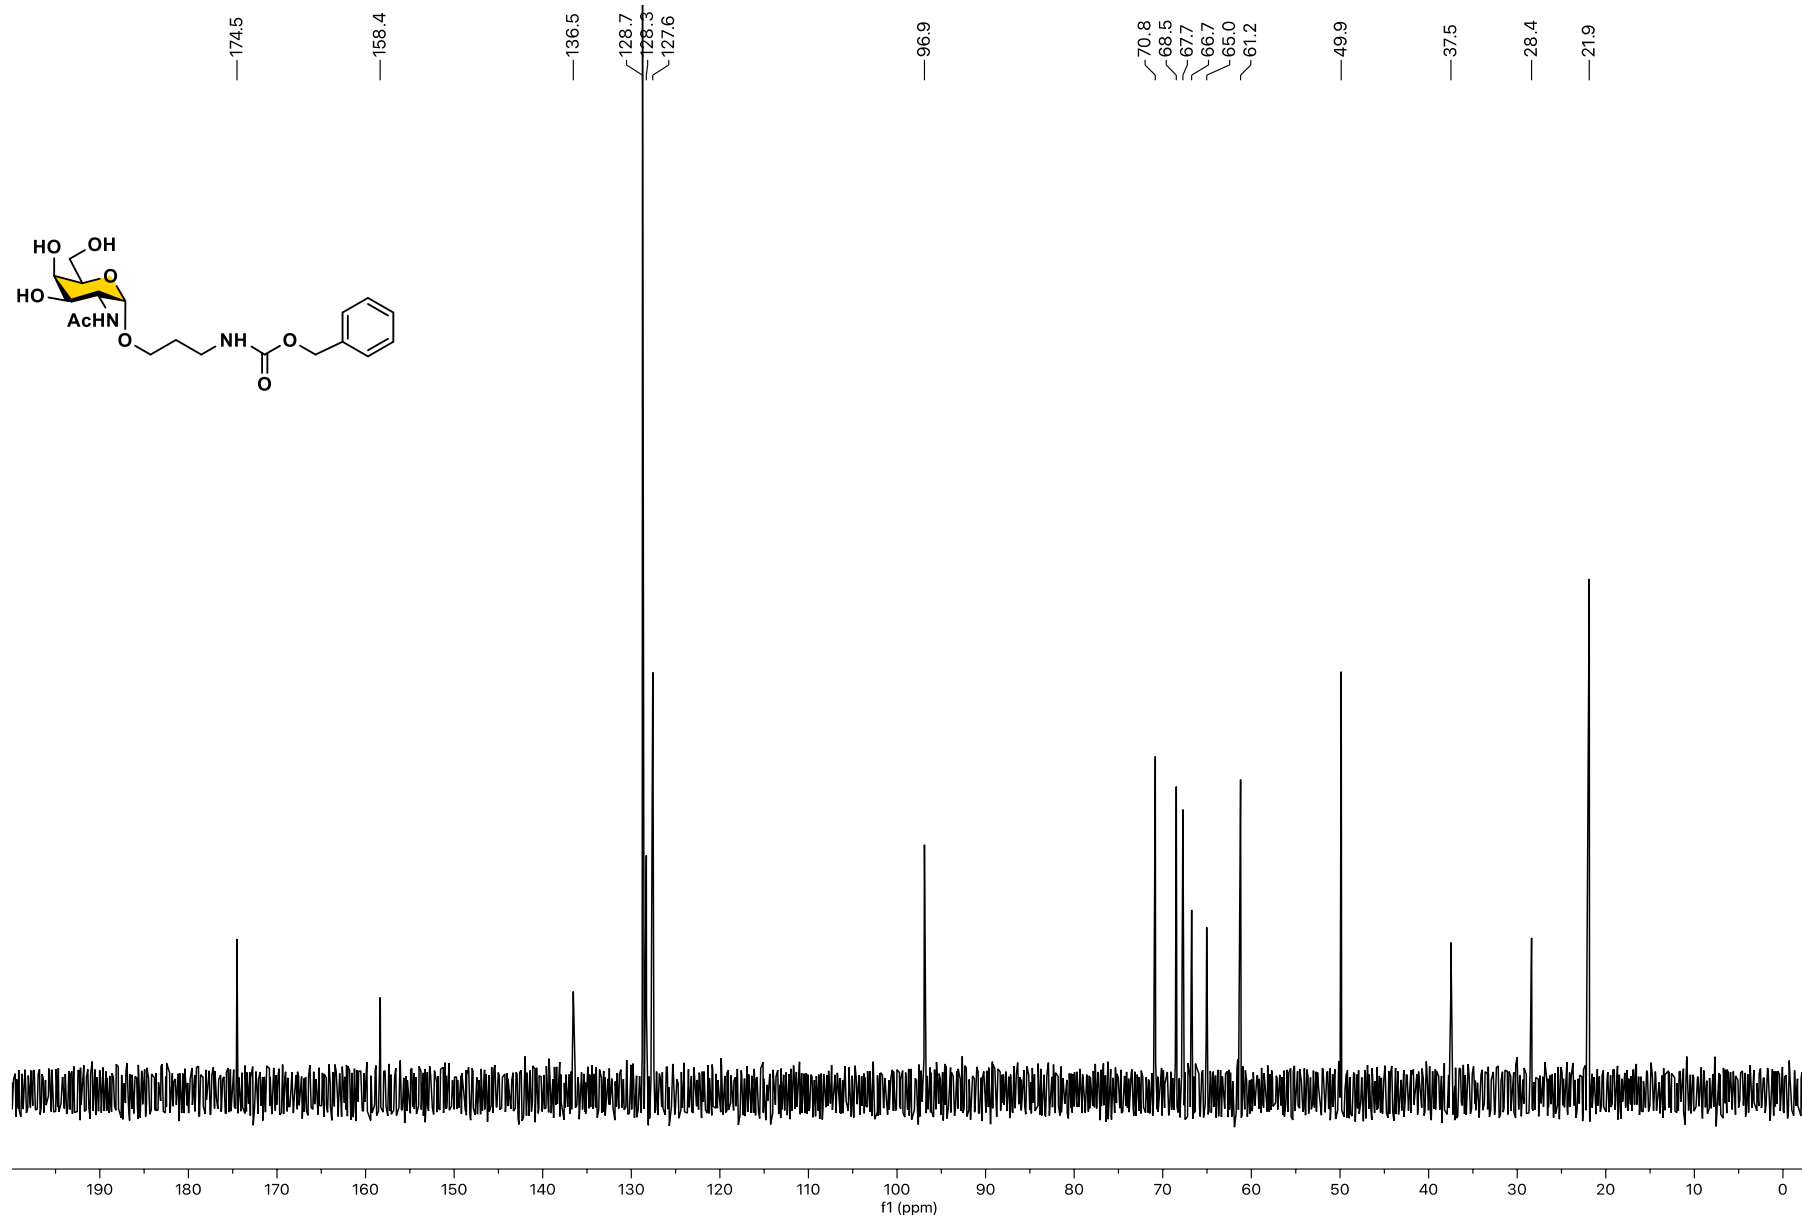

$^1\text{H}$ - $^1\text{H}$  COSY NMR Spectra (400 MHz,  $\text{D}_2\text{O}$ ) of GalNAc $\alpha$ ProNHCbz (**1a**)

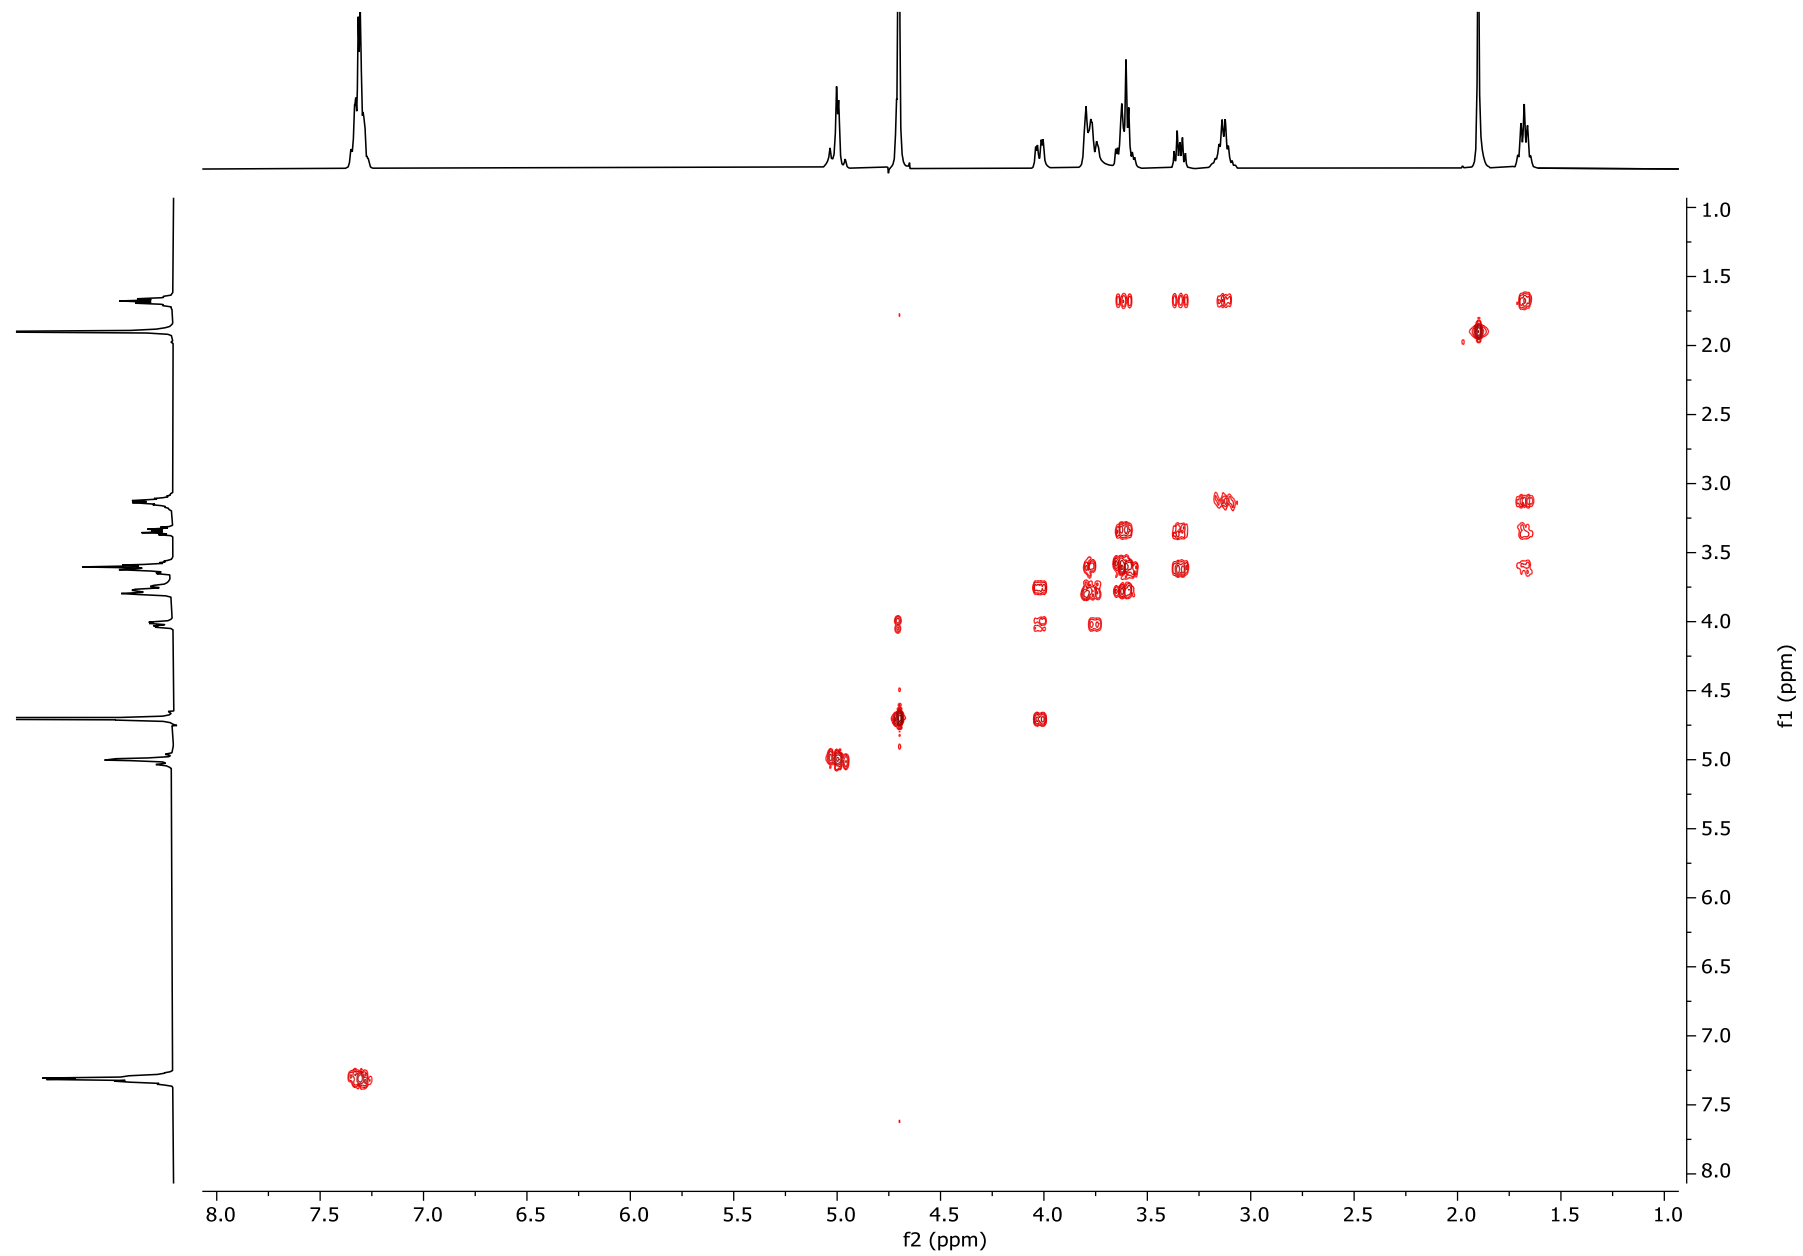

$^1\text{H}$ - $^{13}\text{C}$  HSQC NMR Spectra (400 MHz,  $\text{D}_2\text{O}$ ) of GalNAc $\alpha$ ProNHCbz (**1a**)

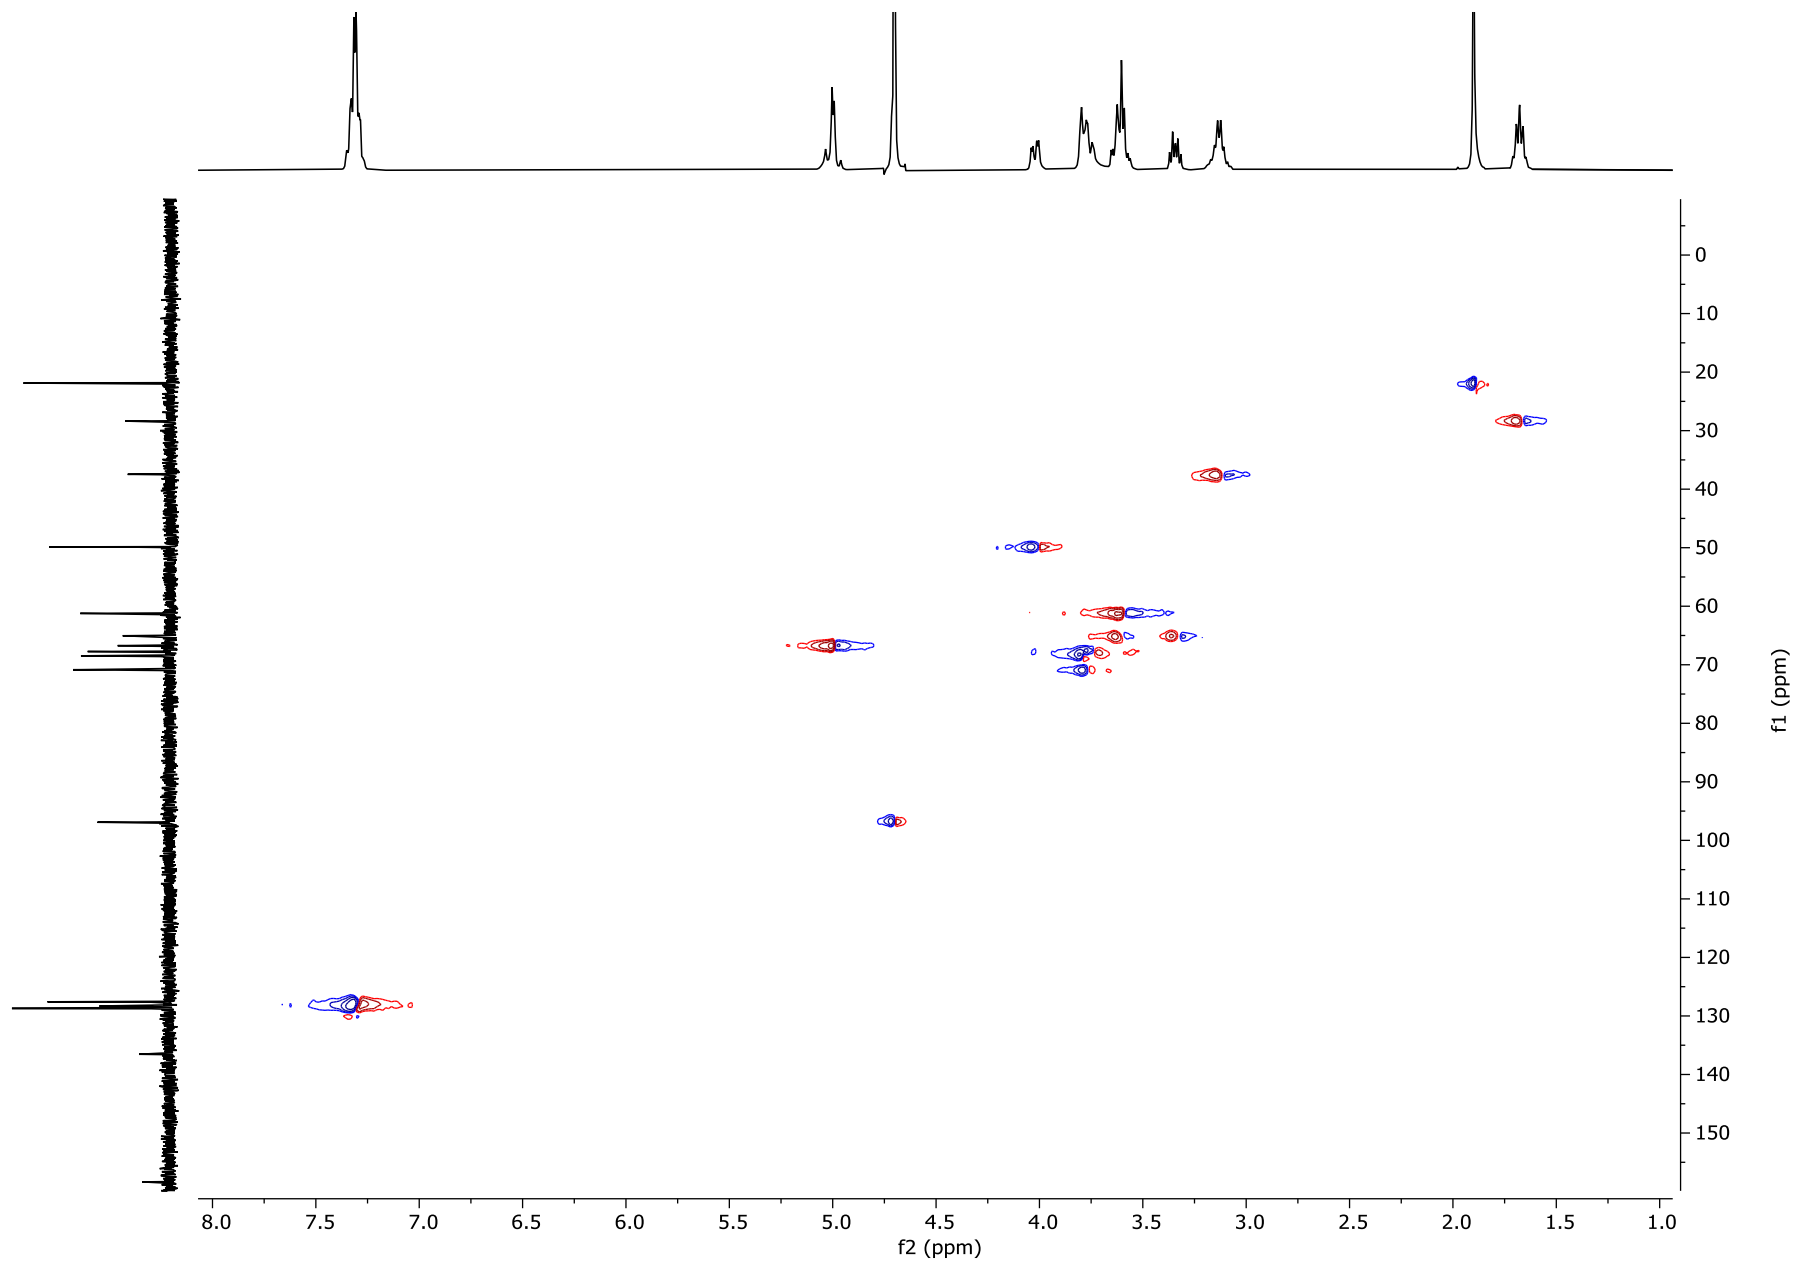

<sup>1</sup>H NMR Spectra (400 MHz, D<sub>2</sub>O) of GalNAcβProNHCbz (**1b**)

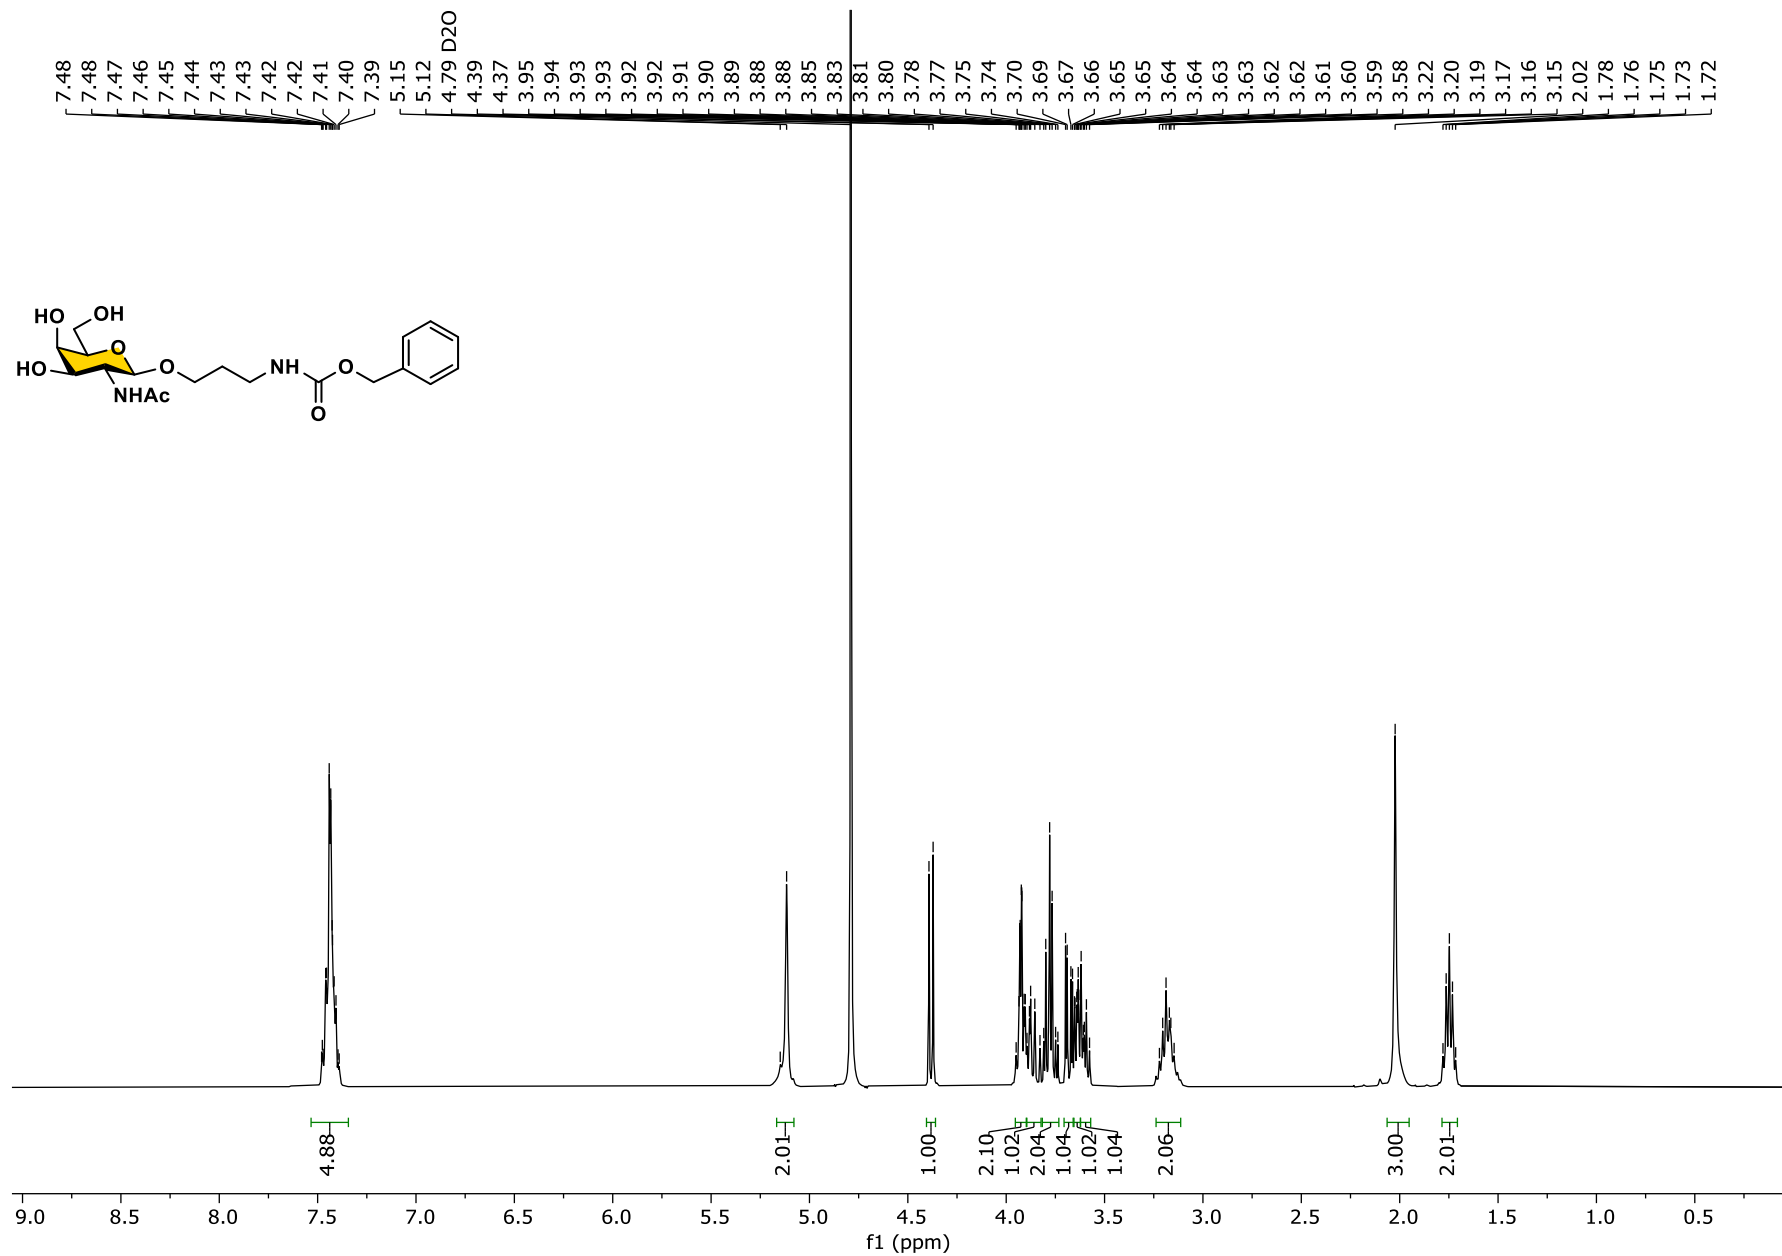

<sup>13</sup>C NMR Spectra (400 MHz, D<sub>2</sub>O) of GalNAcβProNHCbz (**1b**)

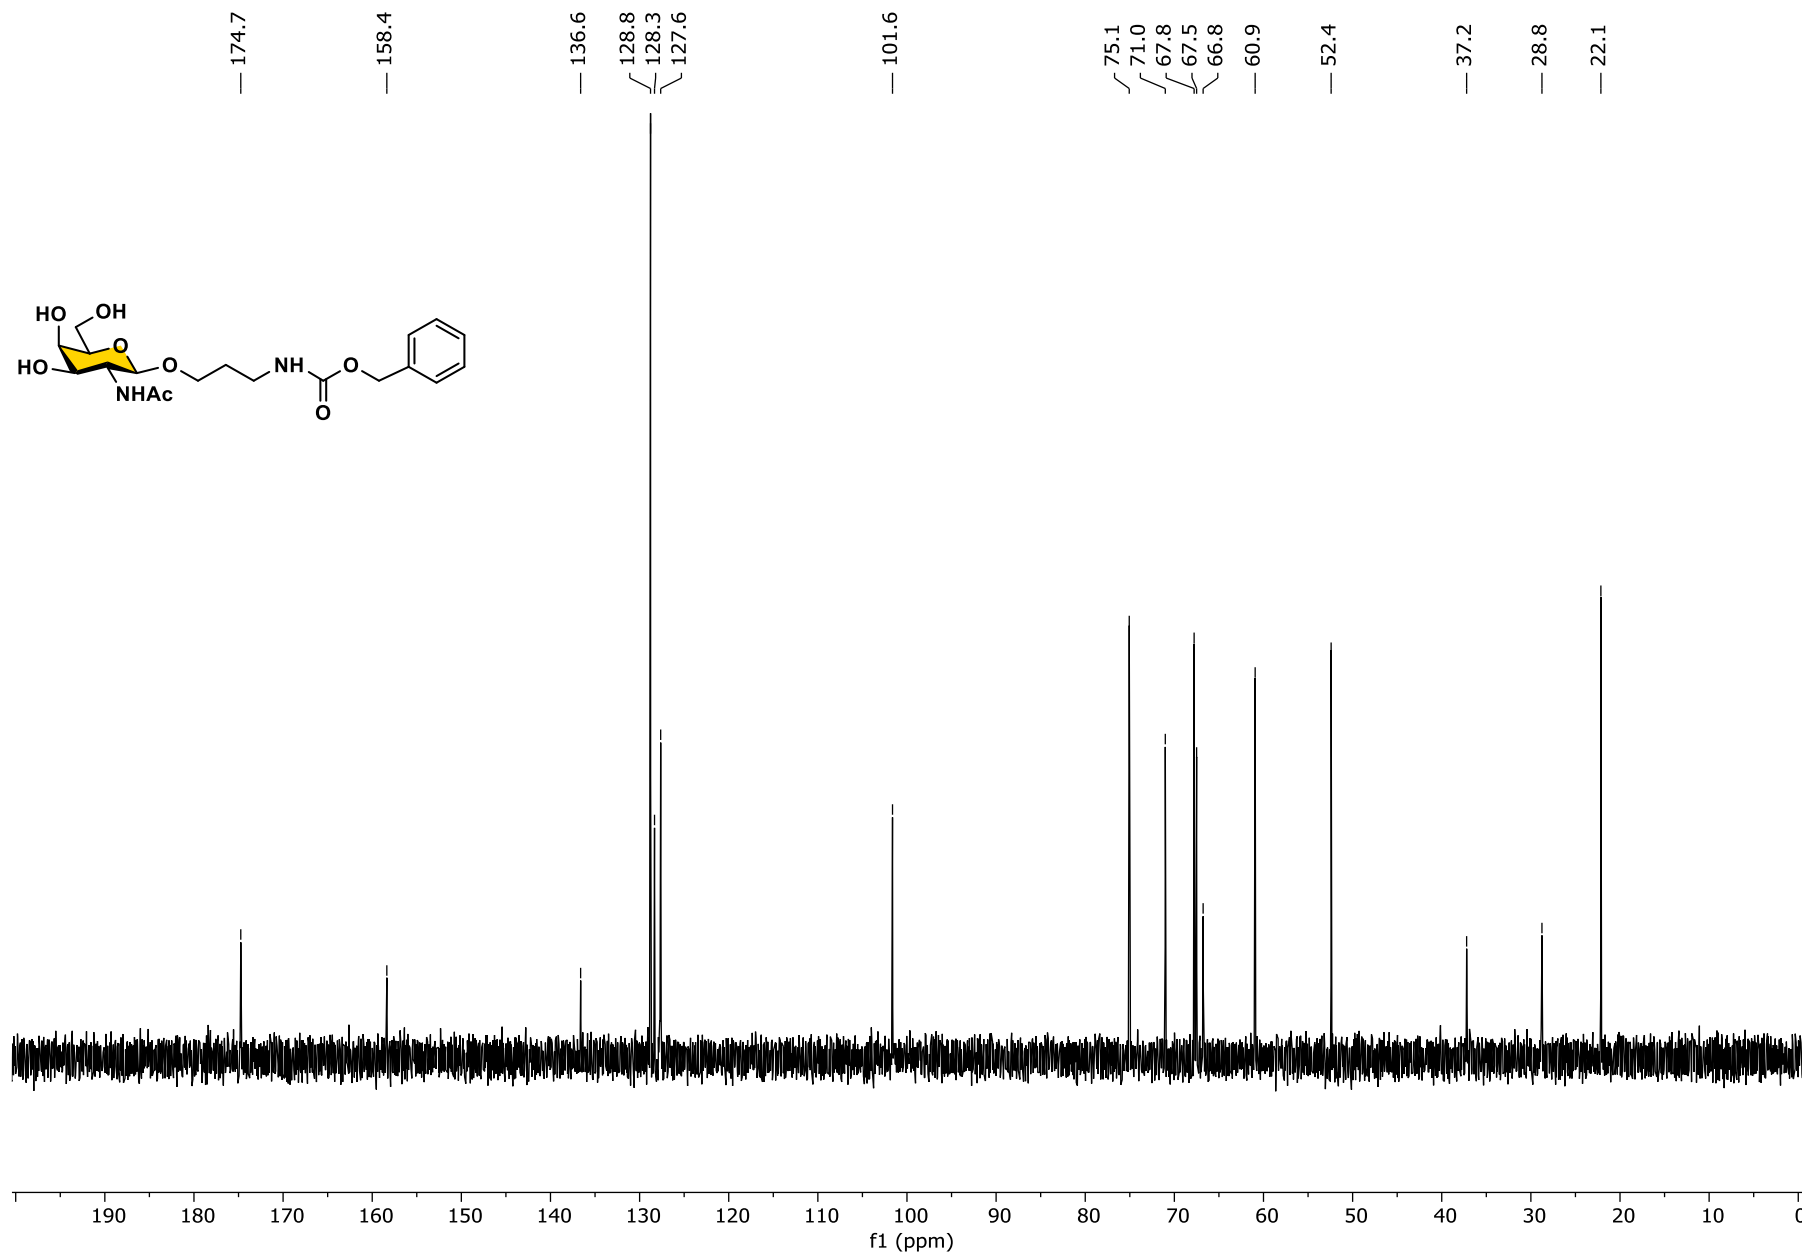

$^1\text{H}$ - $^1\text{H}$  COSY NMR Spectra (400 MHz,  $\text{D}_2\text{O}$ ) of GalNAc $\beta$ ProNHCbz (**1b**)

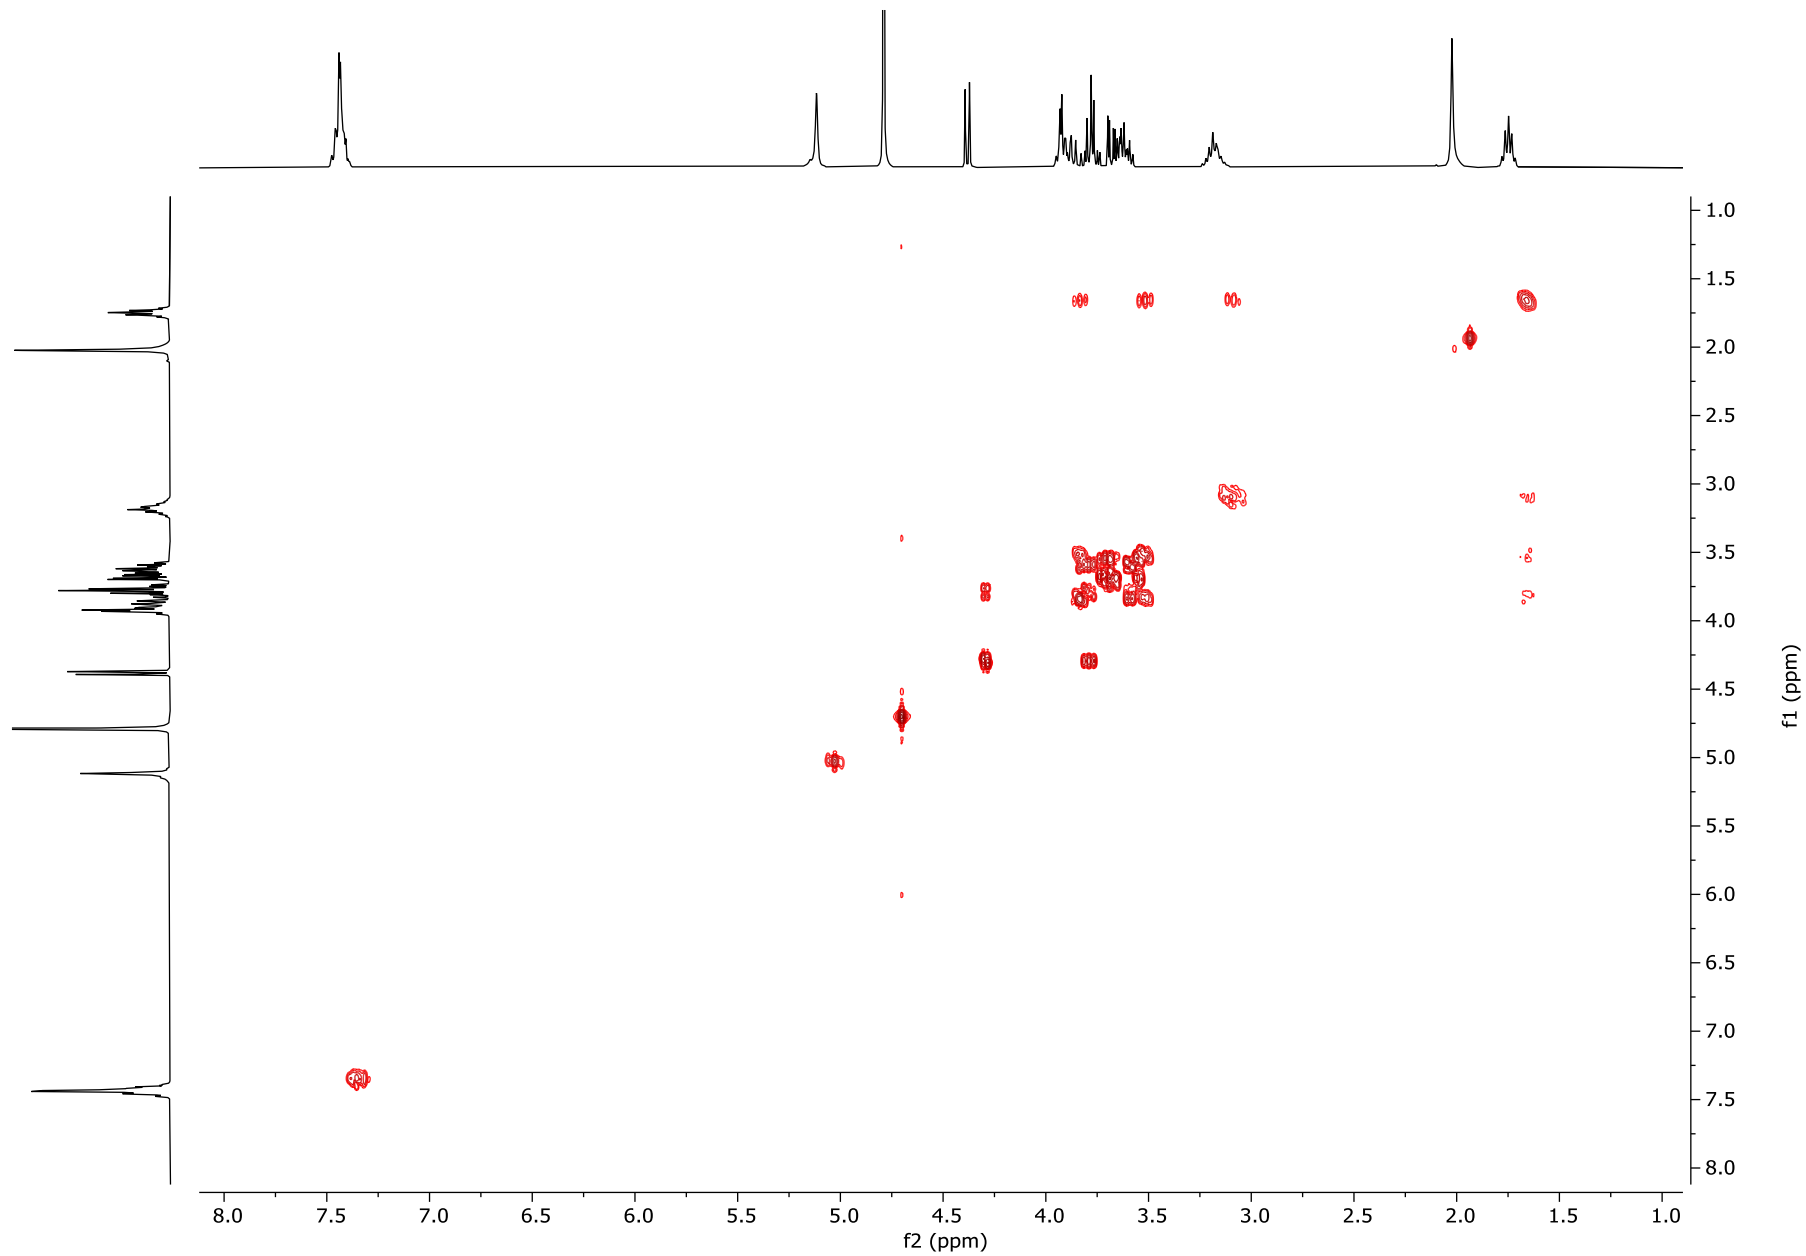

$^1\text{H}$ - $^{13}\text{C}$  HSQC NMR Spectra (400 MHz,  $\text{D}_2\text{O}$ ) of GalNAc $\beta$ ProNHCbz (**1b**)

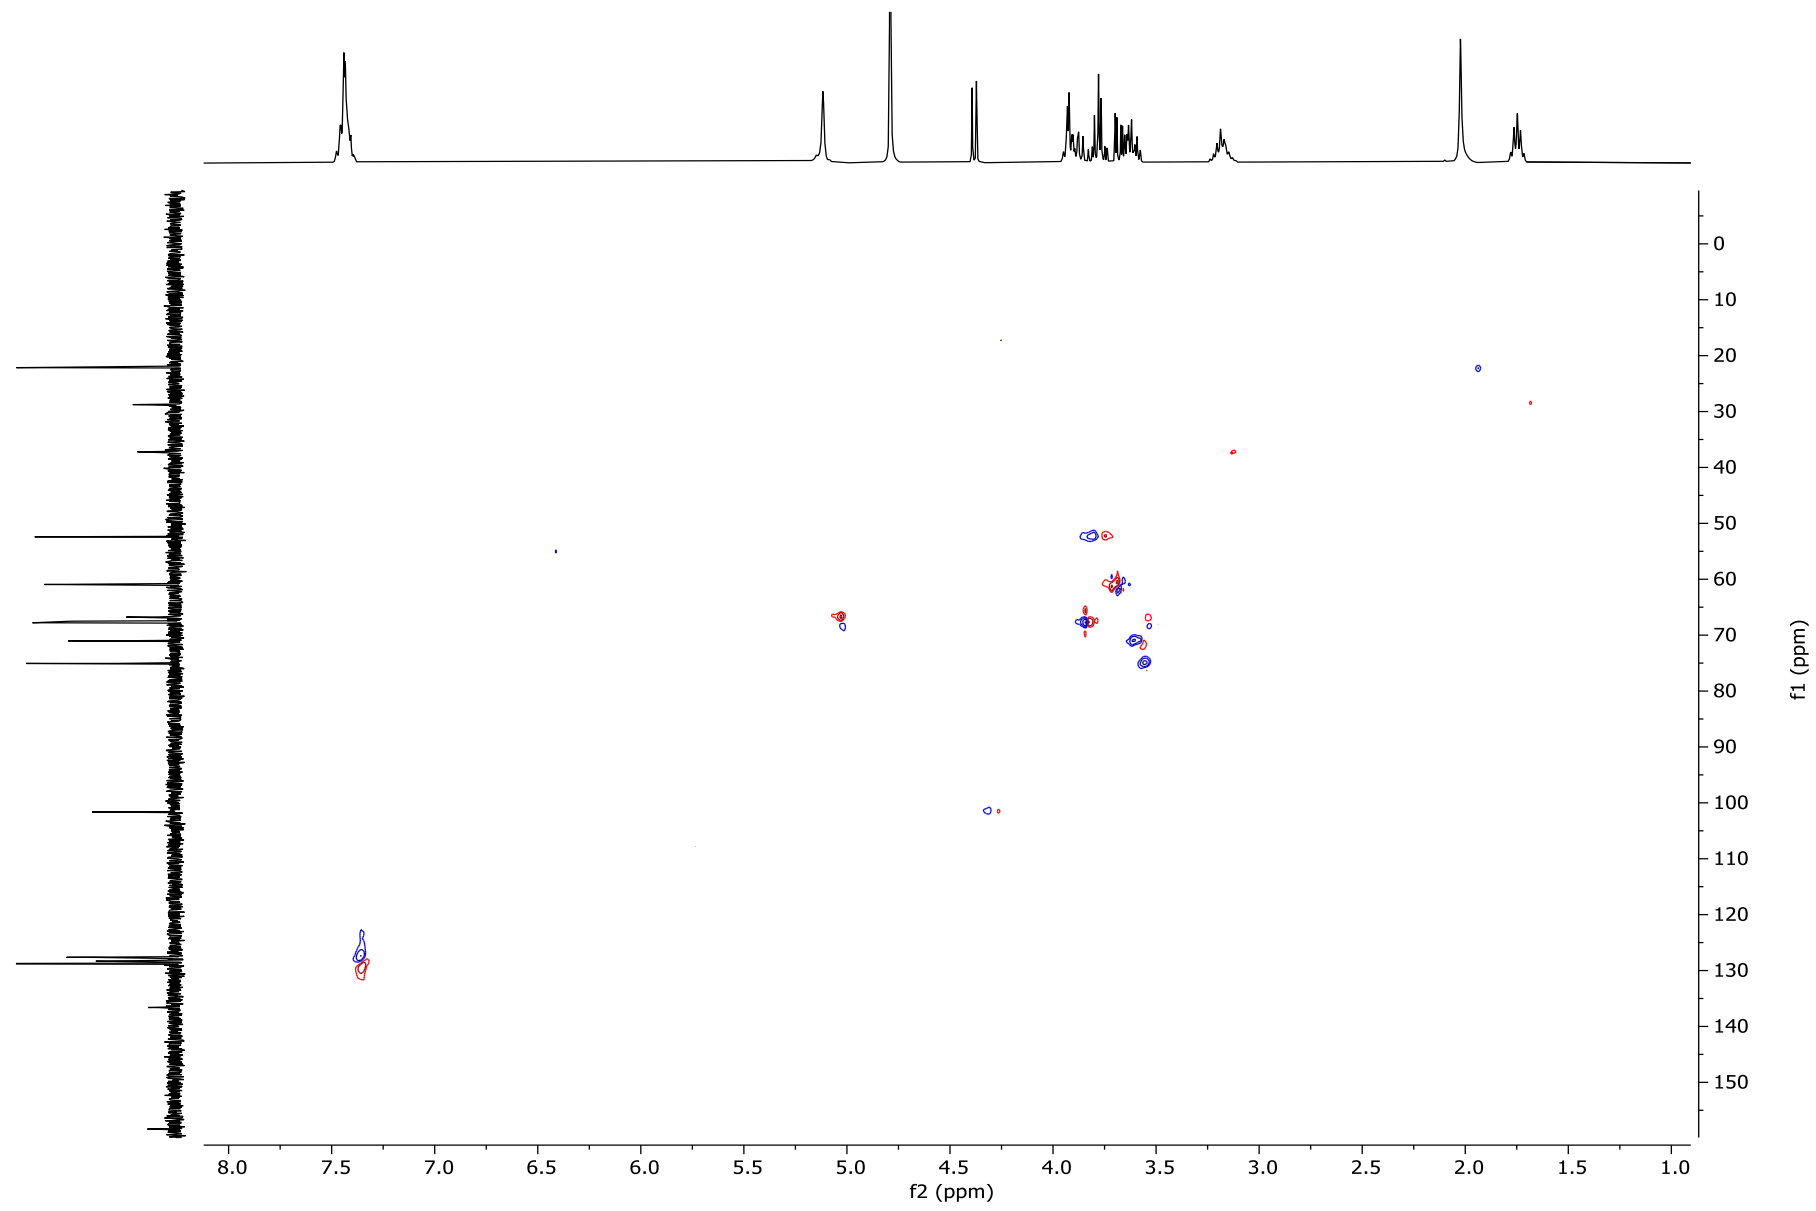



$^1\text{H}$  spectra (400 MHz,  $\text{D}_2\text{O}$ ) of Gal $\alpha$ ProNHCbz (**2a**)

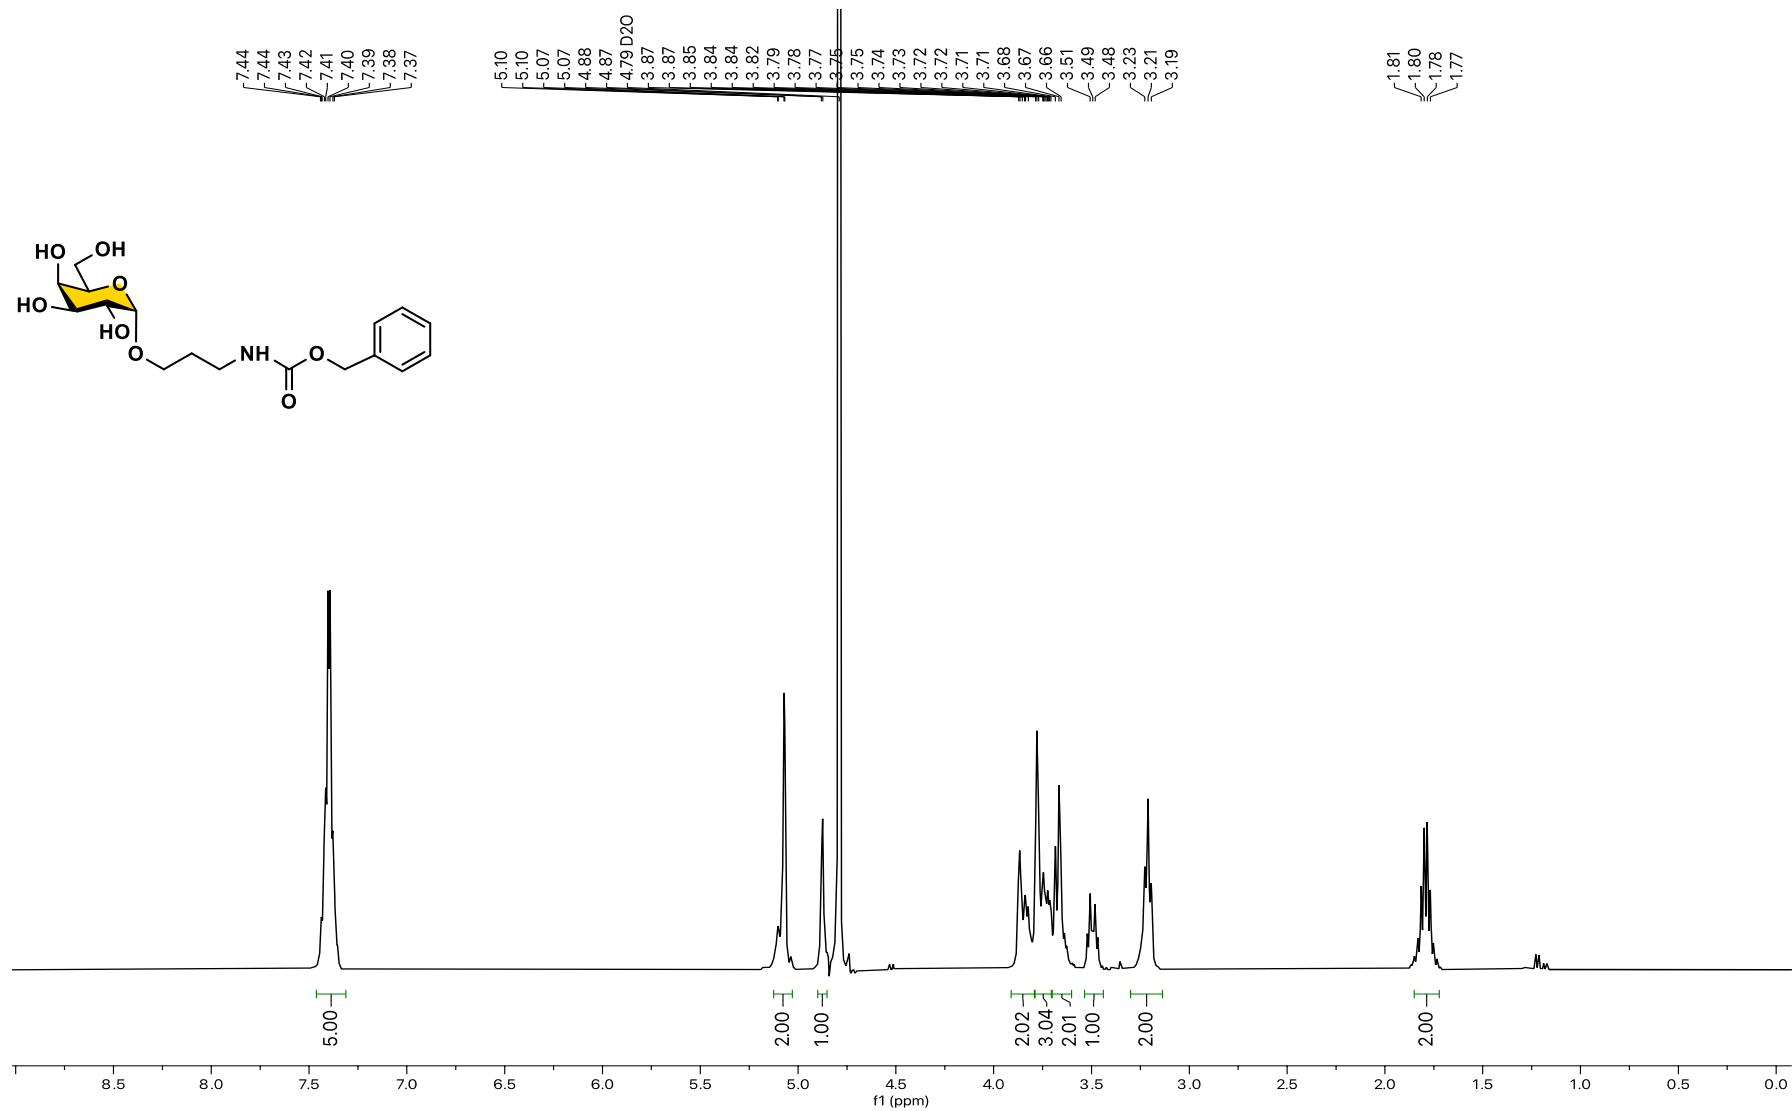

$^{13}\text{C}$  NMR spectra (400 MHz,  $\text{D}_2\text{O}$ ) of Gal $\alpha$ ProNHCbz (**2a**)

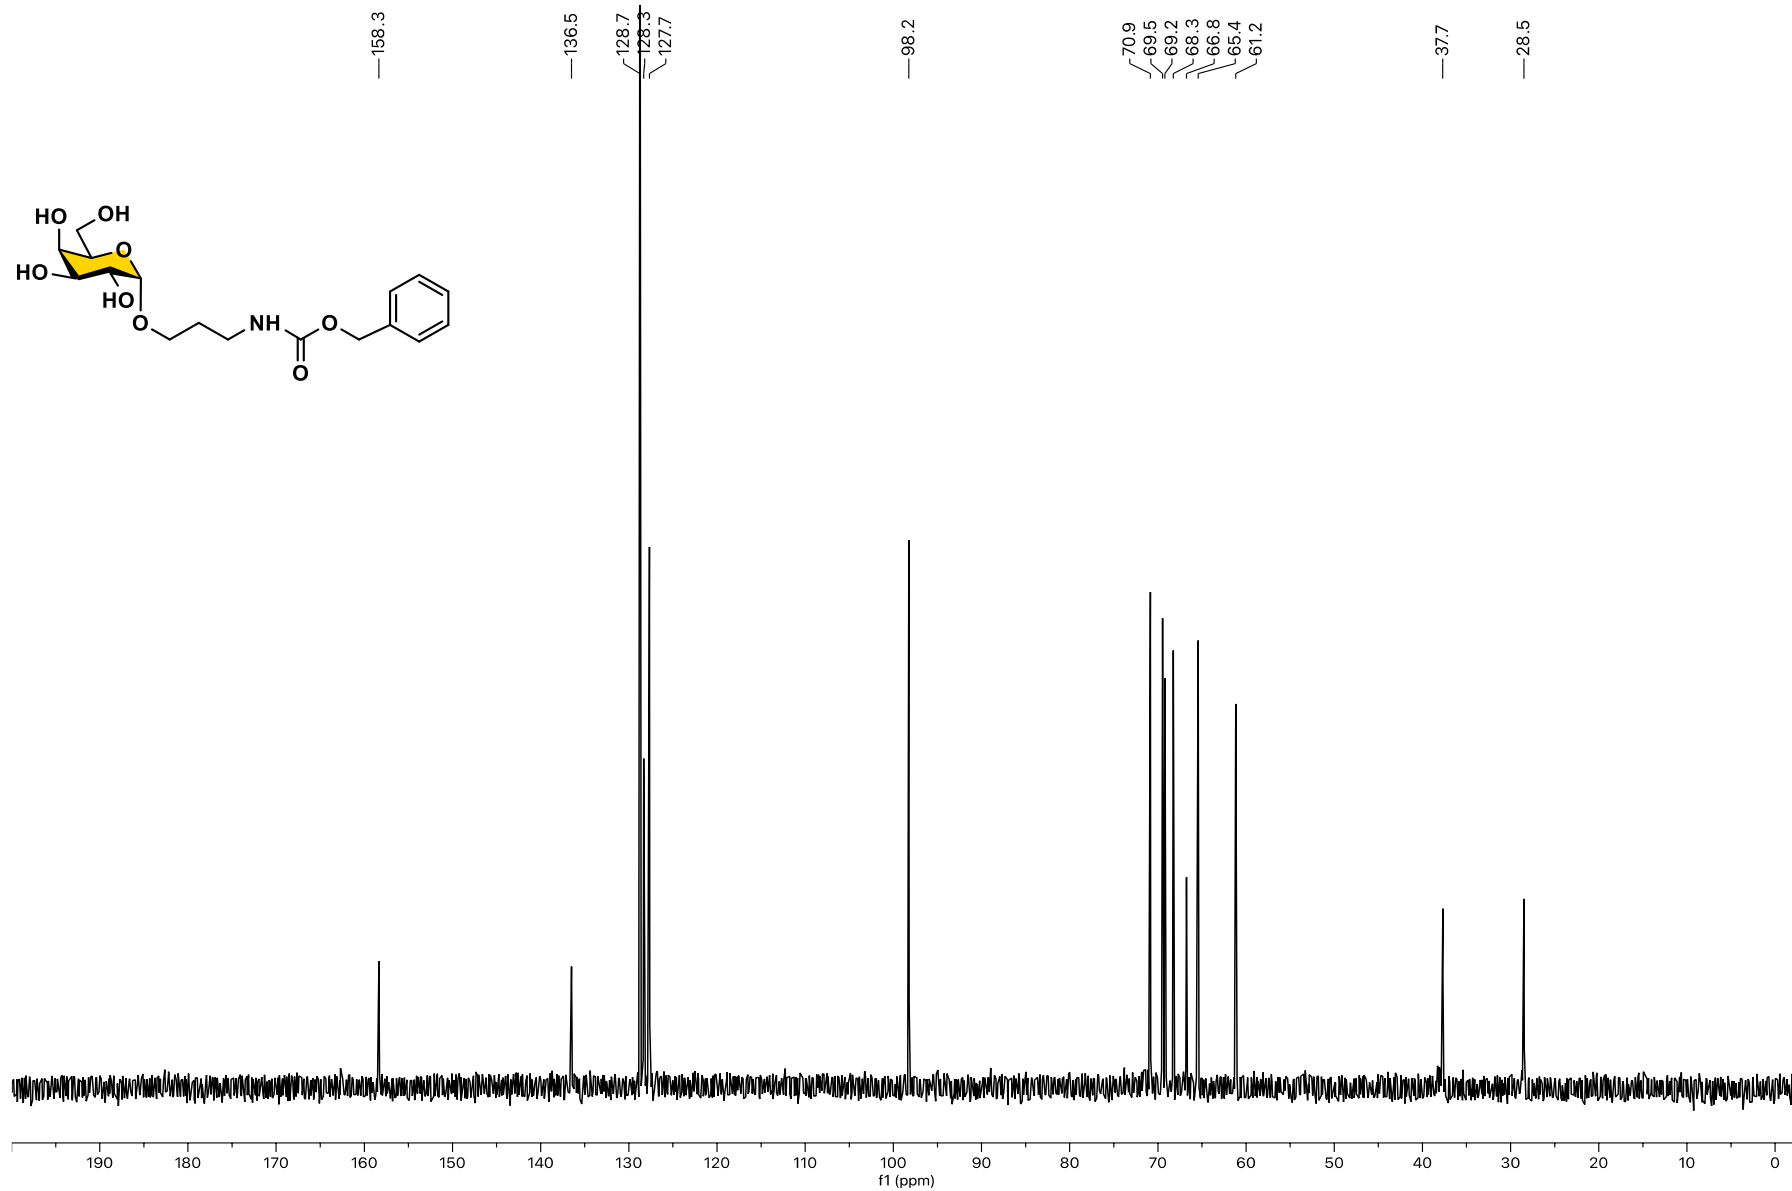

$^1\text{H}$ - $^1\text{H}$  COSY NMR Spectra (400 MHz,  $\text{D}_2\text{O}$ ) of Gal $\alpha$ ProNHCbz (**2a**)

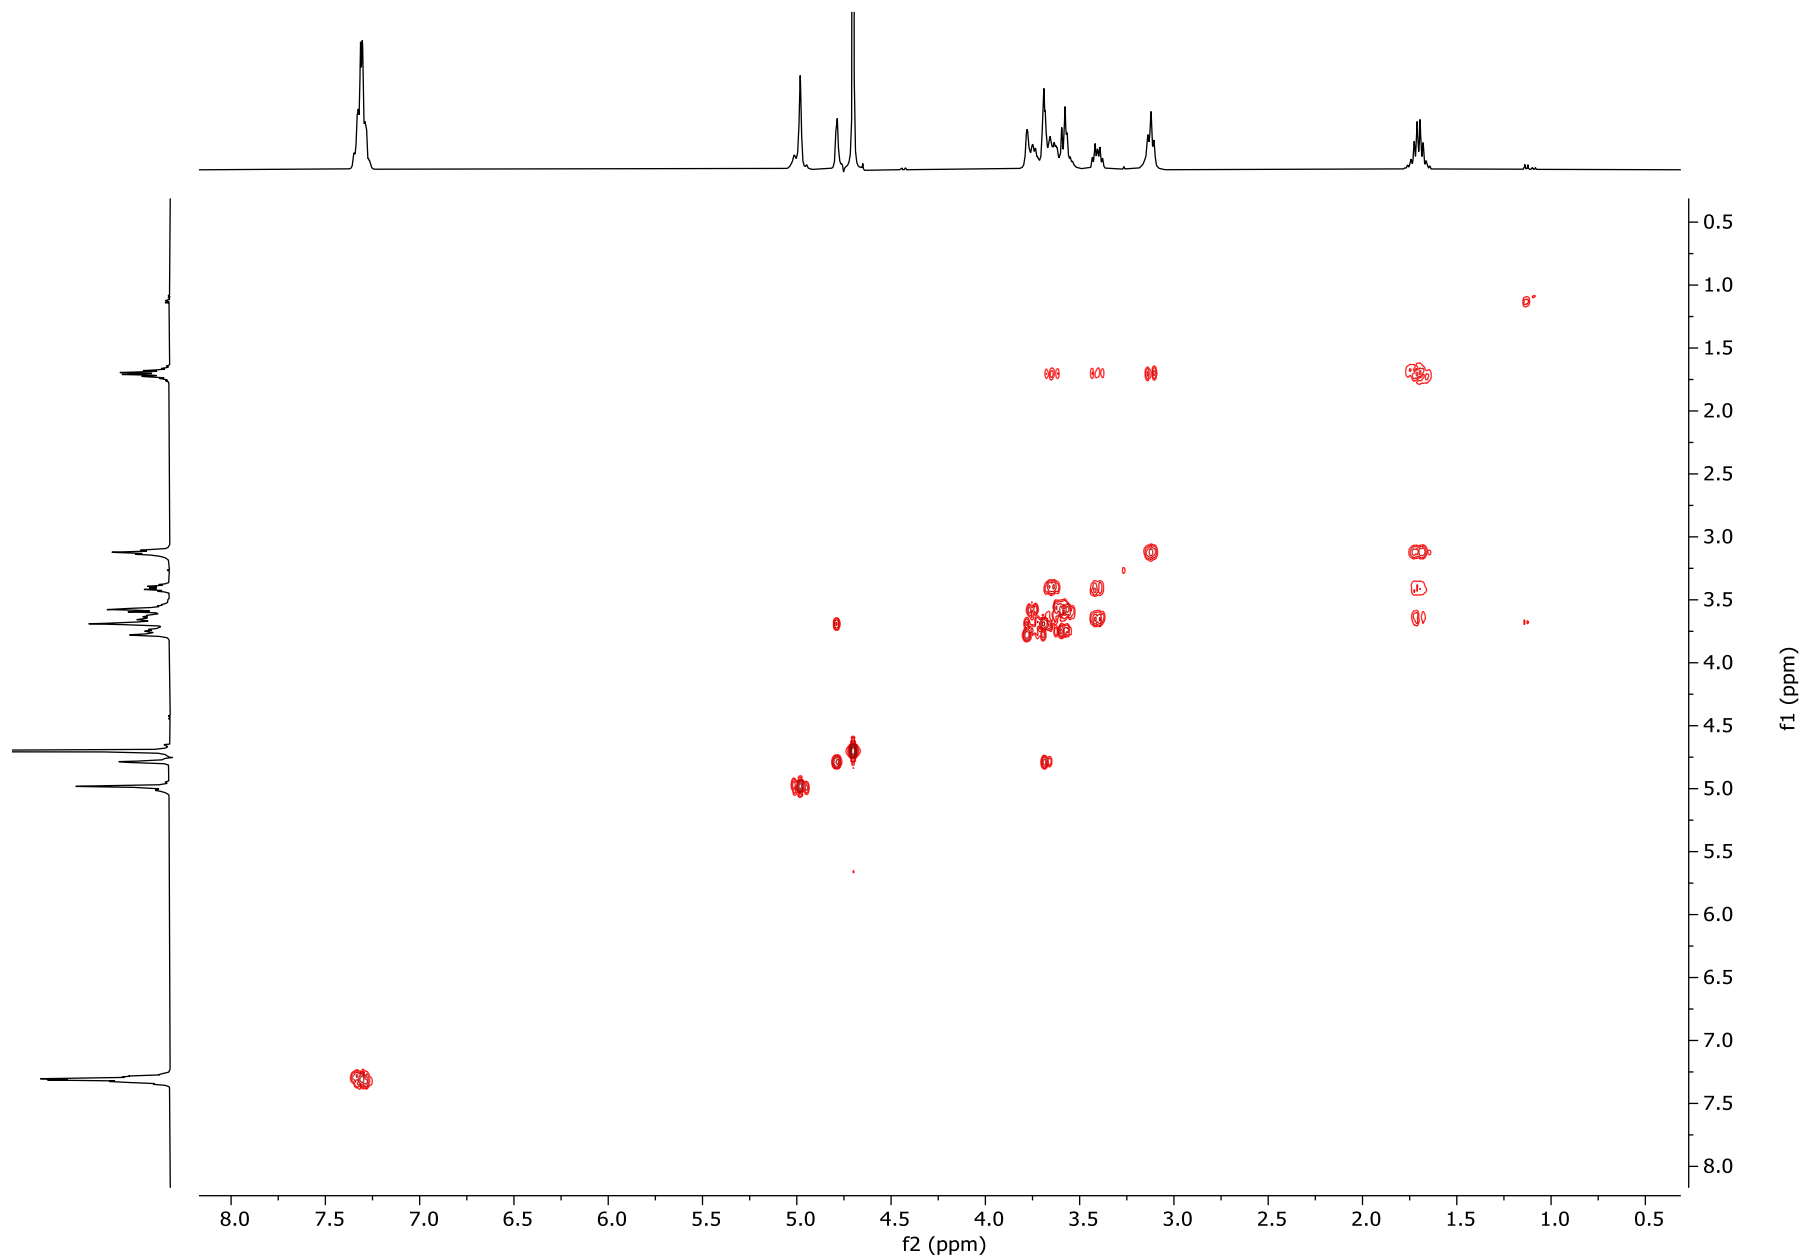

$^1\text{H}$ - $^{13}\text{C}$  HSQC NMR Spectra (400 MHz,  $\text{D}_2\text{O}$ ) of Gal $\alpha$ ProNHCbz (**2a**)

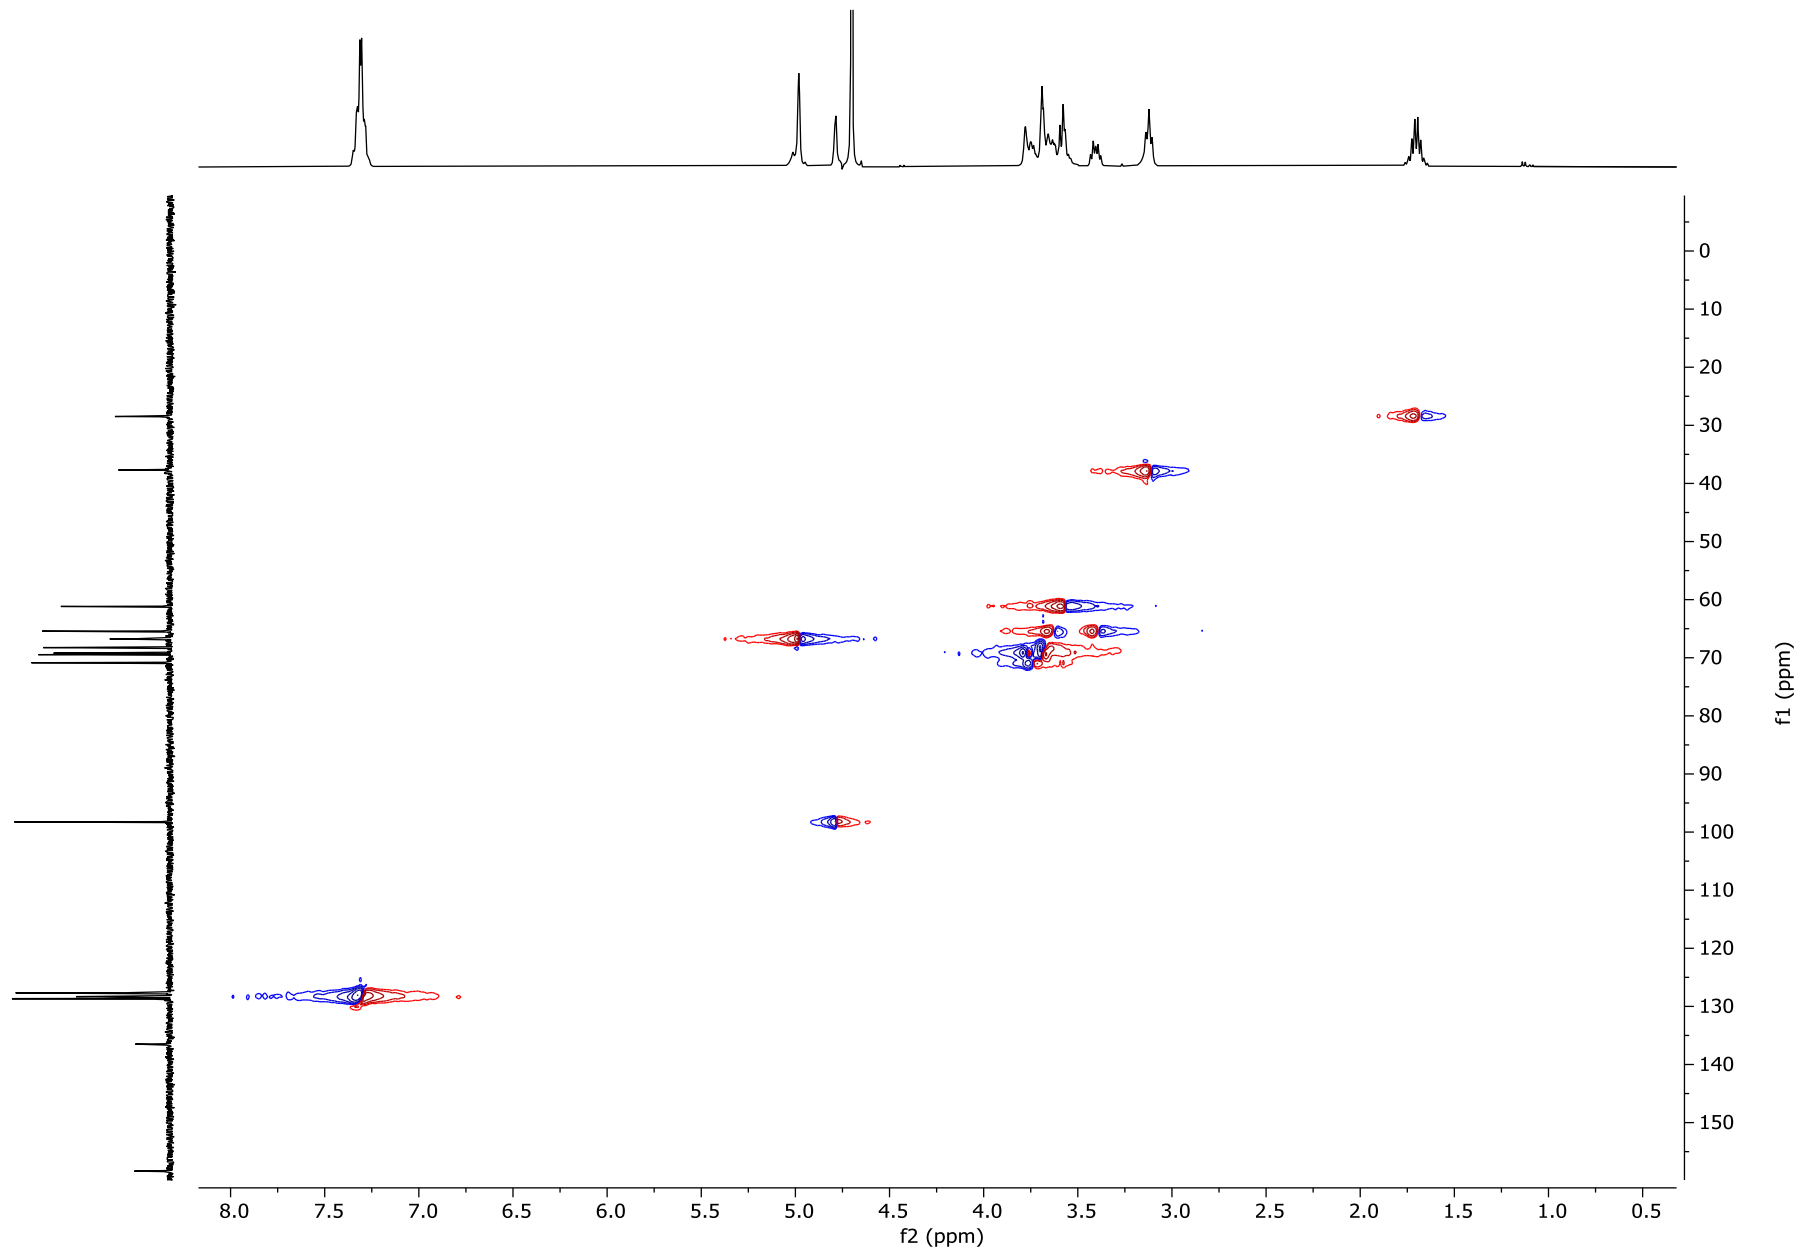

$^1\text{H}$  NMR Spectra (400 MHz,  $\text{D}_2\text{O}$ ) of Gal $\beta$ ProNHCbz (**2b**)

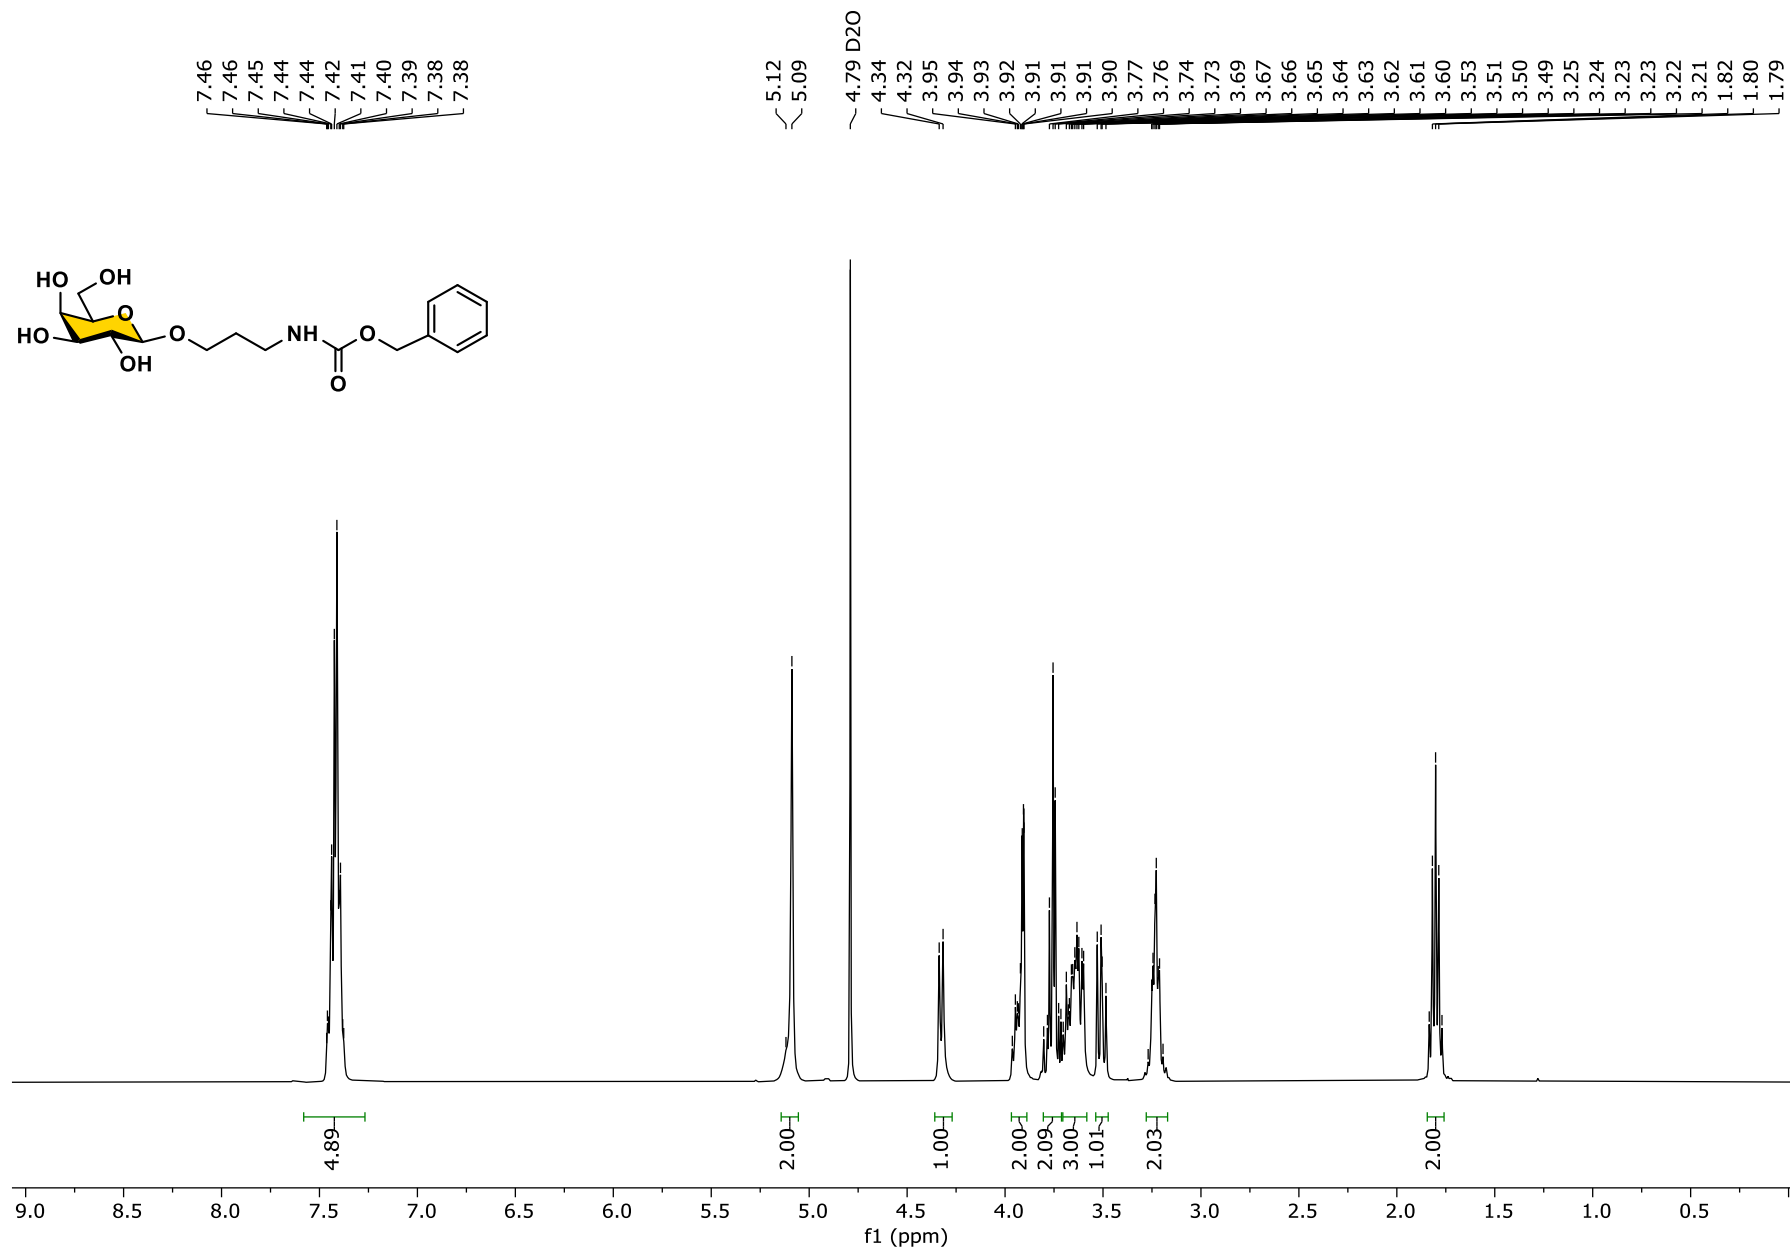

7.46  
7.46  
7.45  
7.44  
7.44  
7.42  
7.41  
7.40  
7.39  
7.38

5.12  
5.09  
4.79 D2O  
4.34  
4.32  
3.95  
3.94  
3.93  
3.92  
3.91  
3.91  
3.91  
3.90  
3.77  
3.76  
3.74  
3.73  
3.69  
3.67  
3.66  
3.65  
3.64  
3.63  
3.62  
3.61  
3.60  
3.53  
3.51  
3.50  
3.49  
3.25  
3.24  
3.23  
3.23  
3.22  
3.21  
1.82  
1.80  
1.79

4.89

2.00

1.00

2.00

2.09

3.00

1.01

2.03

2.00

f1 (ppm)

S21

$^{13}\text{C}$  NMR Spectra (400 MHz,  $\text{D}_2\text{O}$ ) of Gal $\beta$ ProNHCbz (**2b**)

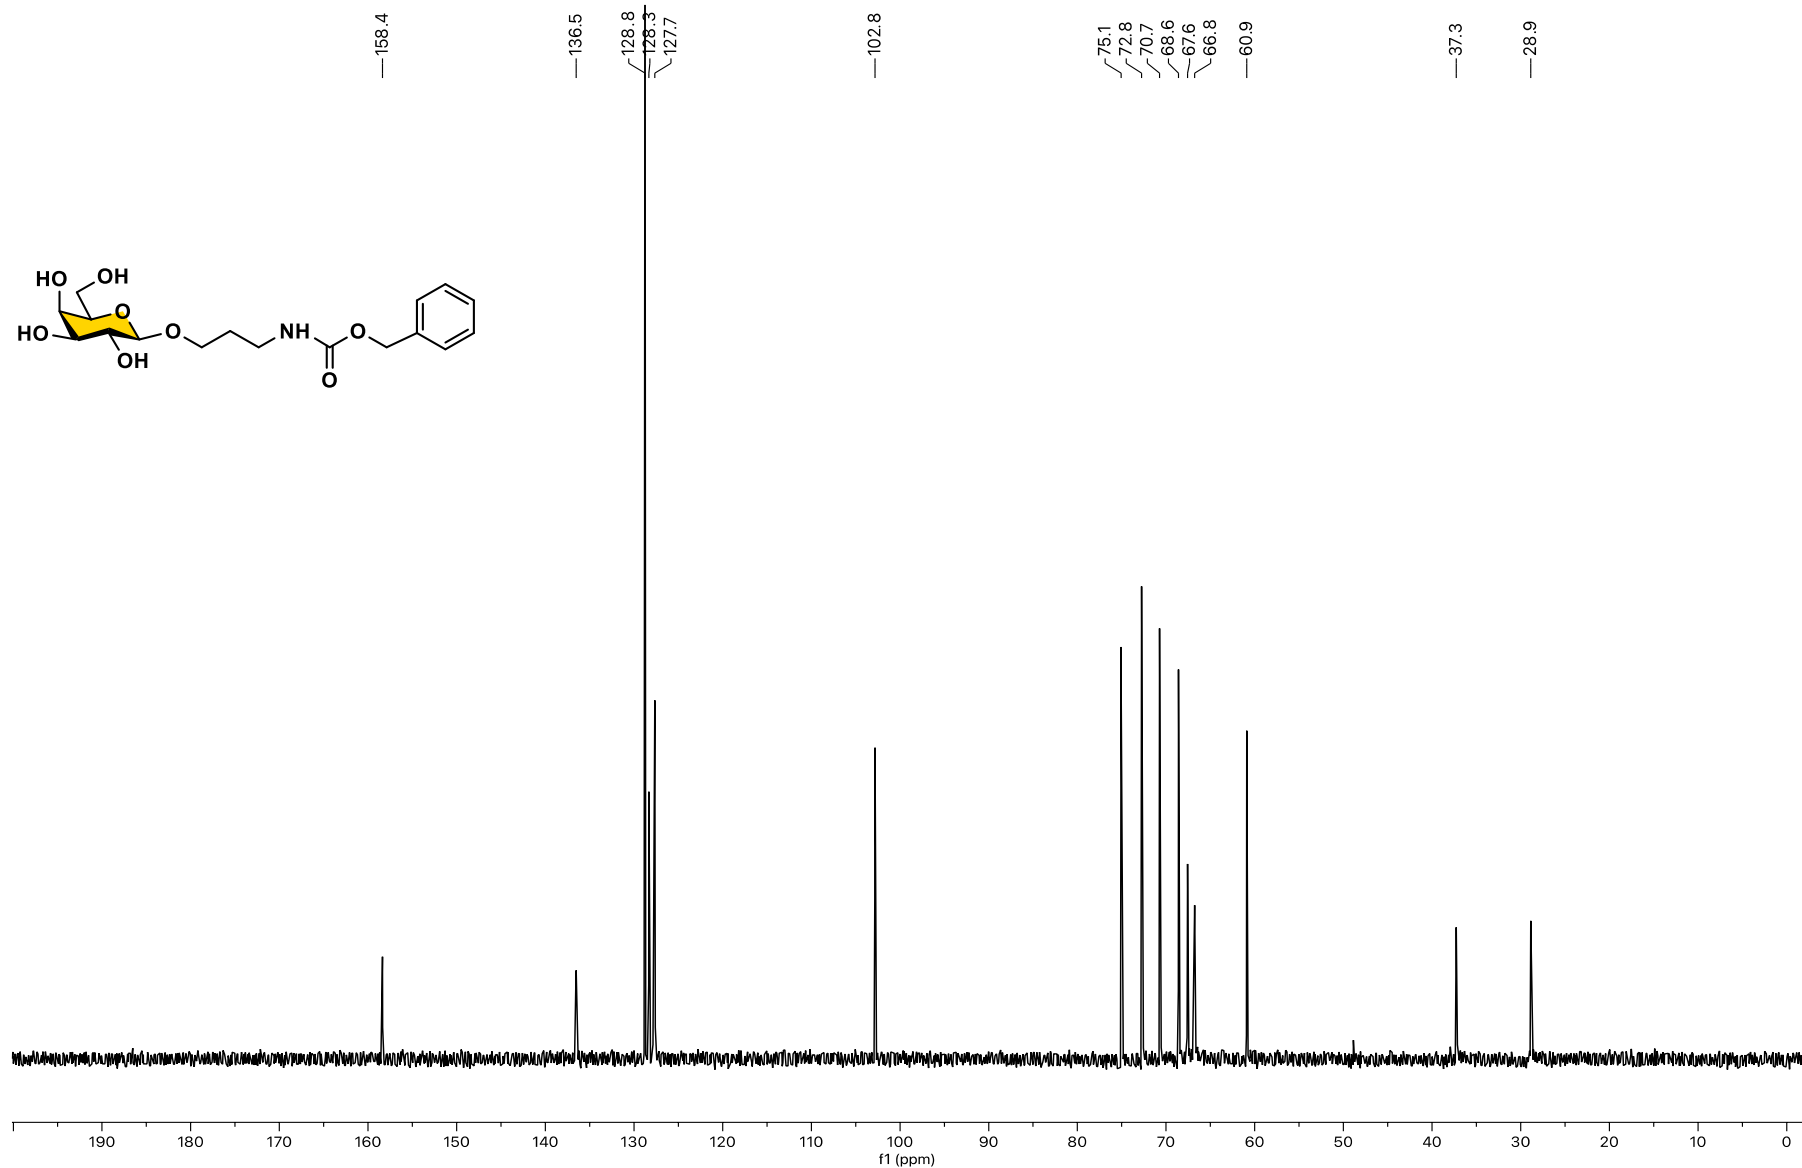

$^1\text{H}$ - $^1\text{H}$  COSY NMR Spectra (400 MHz,  $\text{D}_2\text{O}$ ) of Gal $\beta$ ProNHCbz (**2b**)

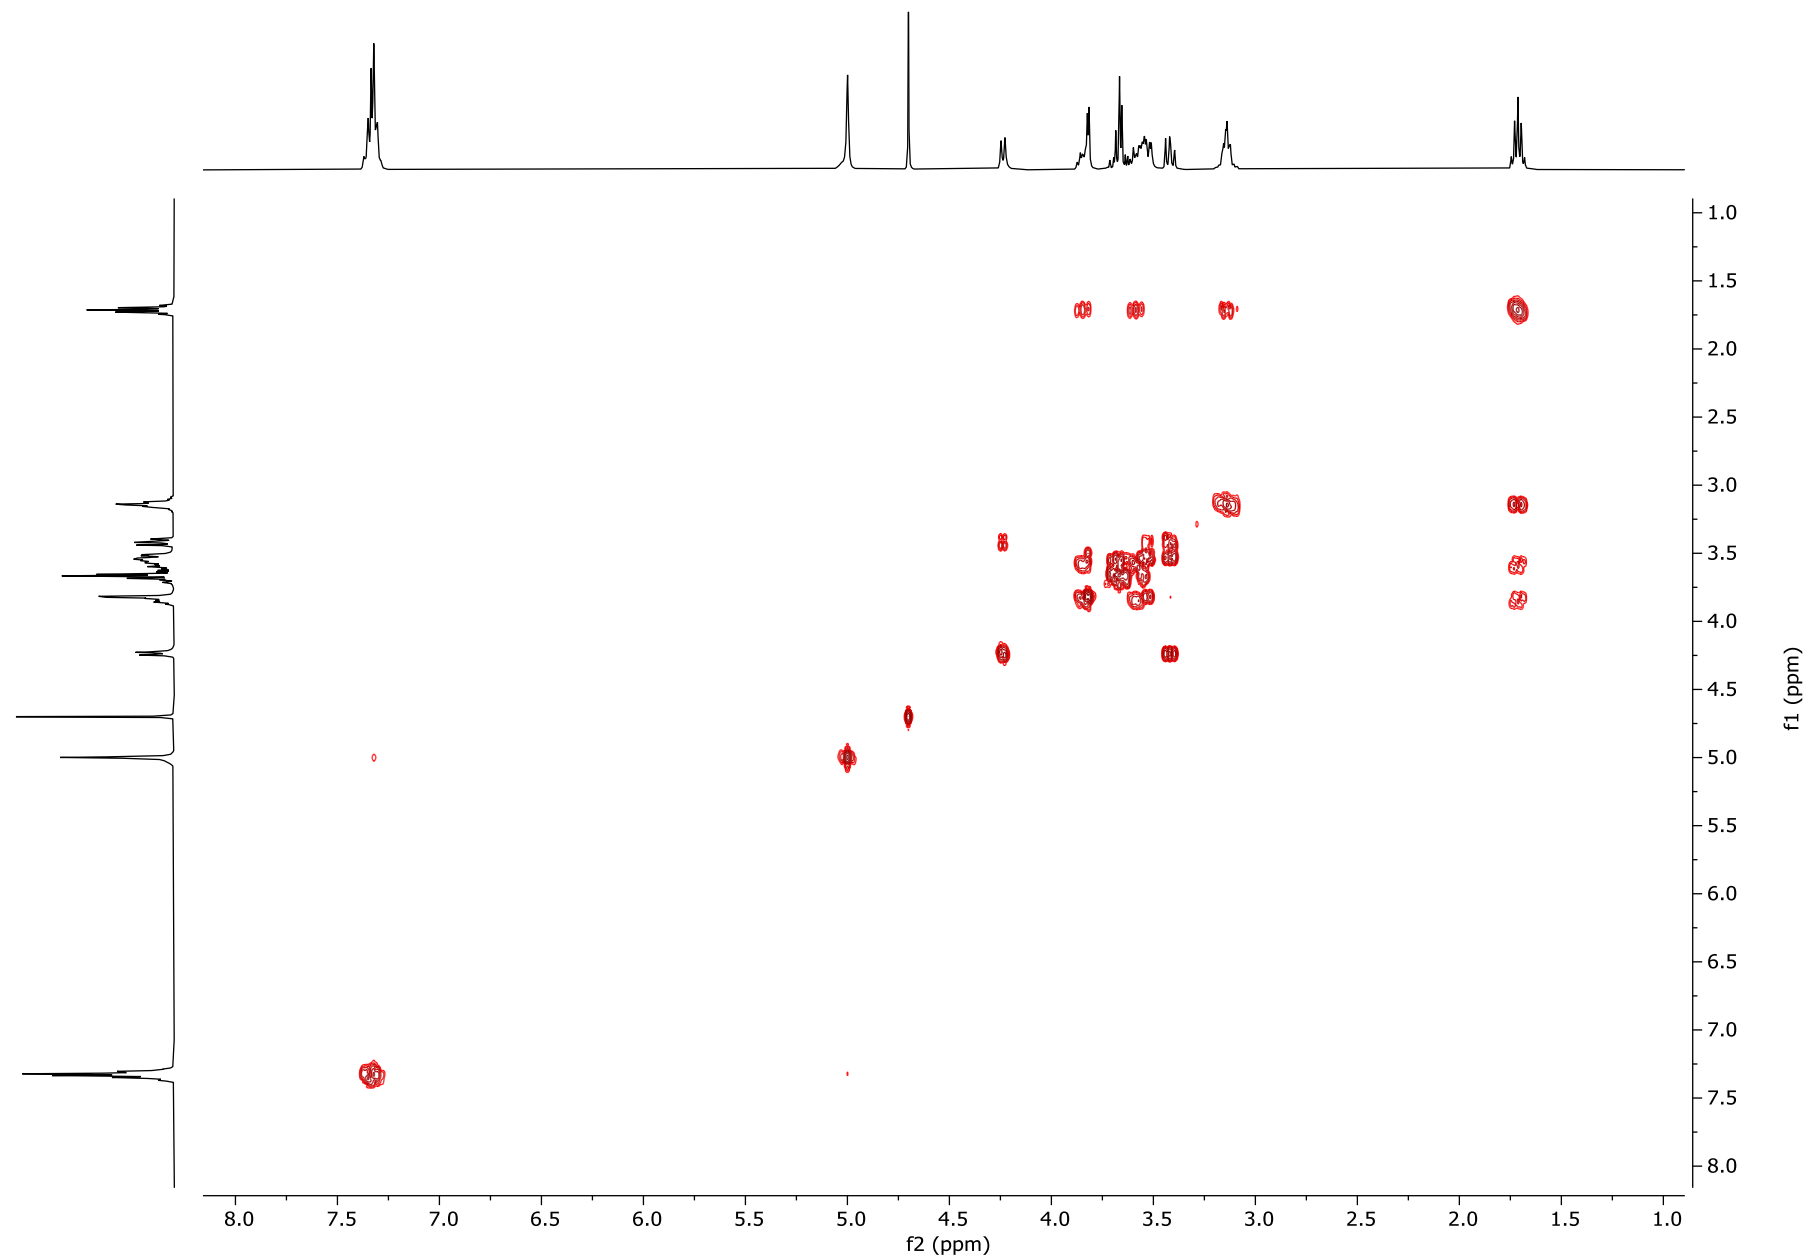

$^1\text{H}$ - $^{13}\text{C}$  HSQC NMR Spectra (400 MHz,  $\text{D}_2\text{O}$ ) of Gal $\beta$ ProNHCbz (**2b**)

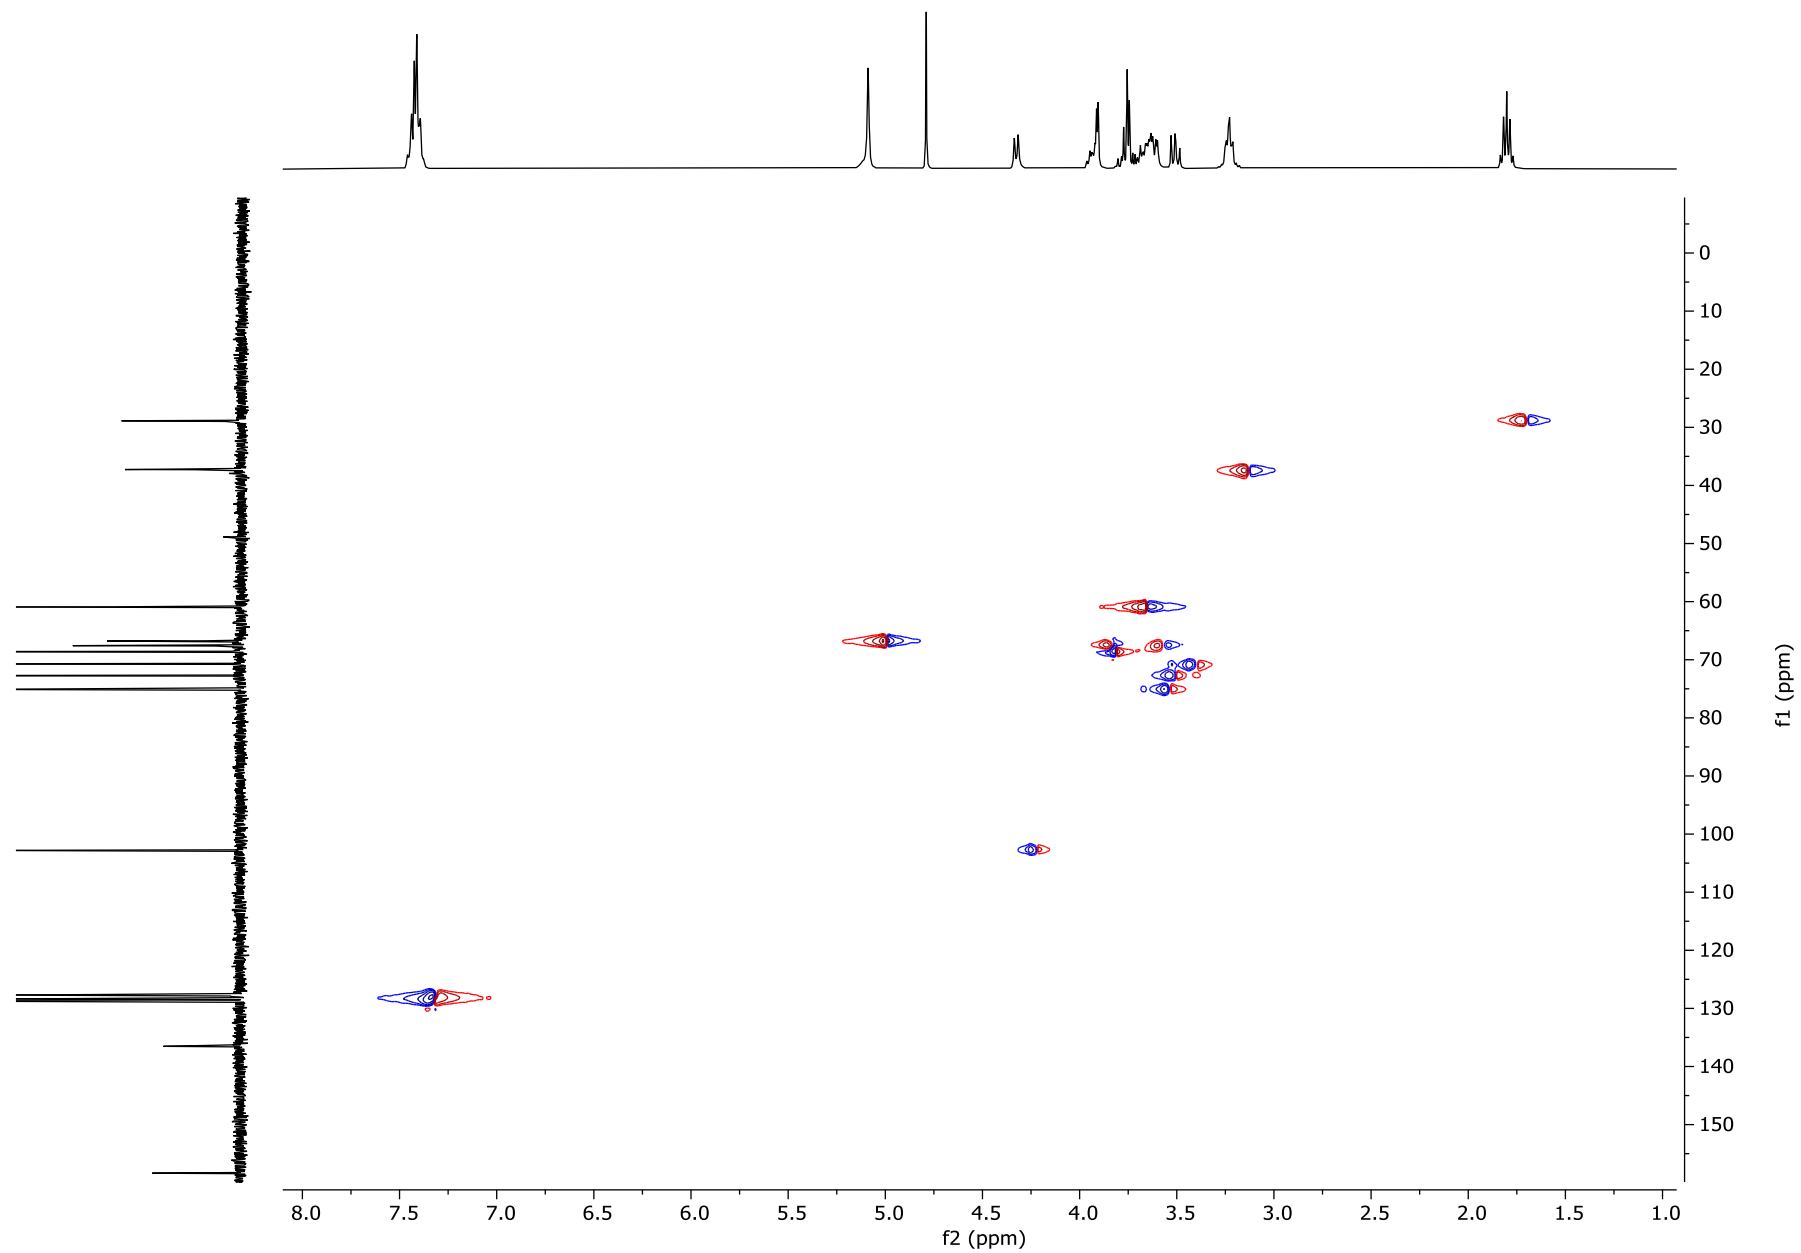



$^1\text{H}$  Spectra (400 MHz,  $\text{D}_2\text{O}$ ) of Gal $\beta$ 3GalNAc $\alpha$ ProNHCBz (**3a**)

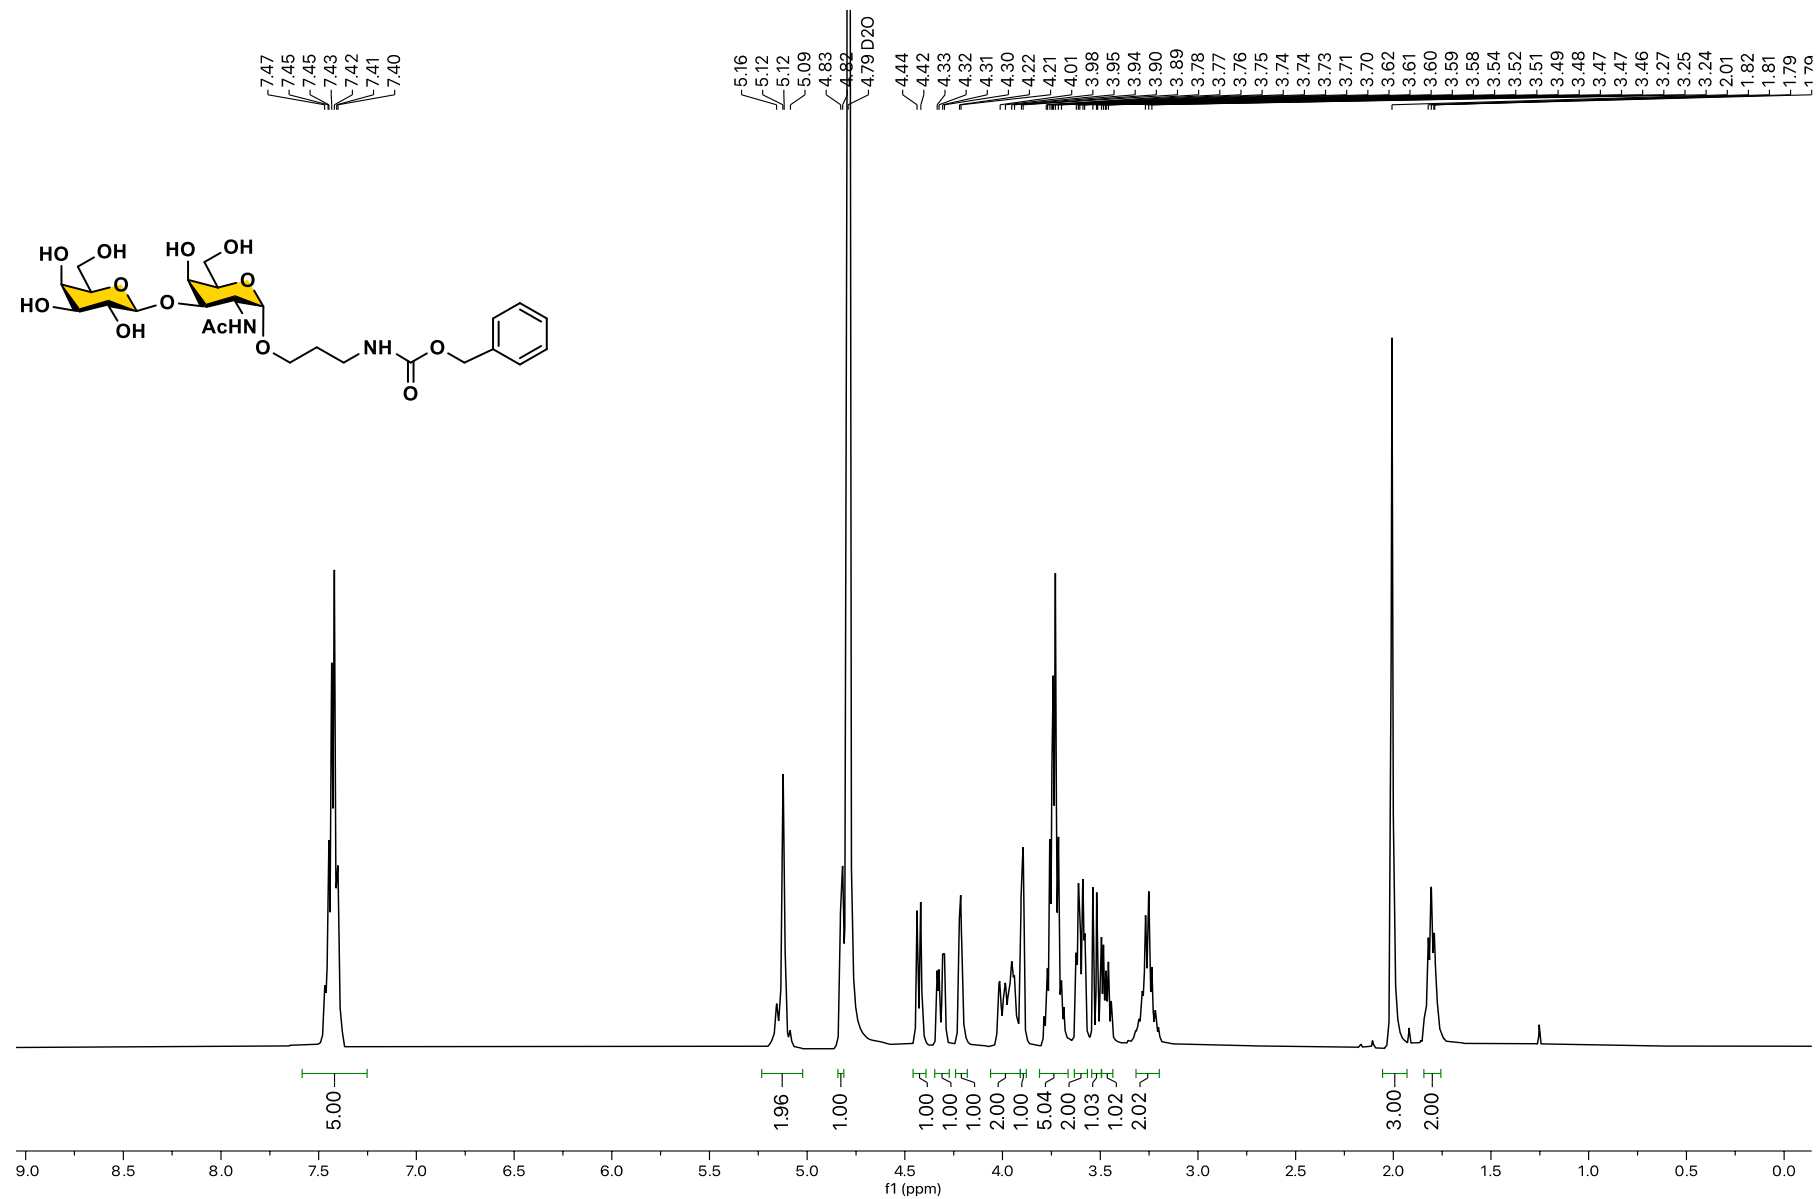

$^{13}\text{C}$  NMR Spectra (400 MHz,  $\text{D}_2\text{O}$ ) of Gal $\beta$ 3GalNAc $\alpha$ ProNHCbz (**3a**)

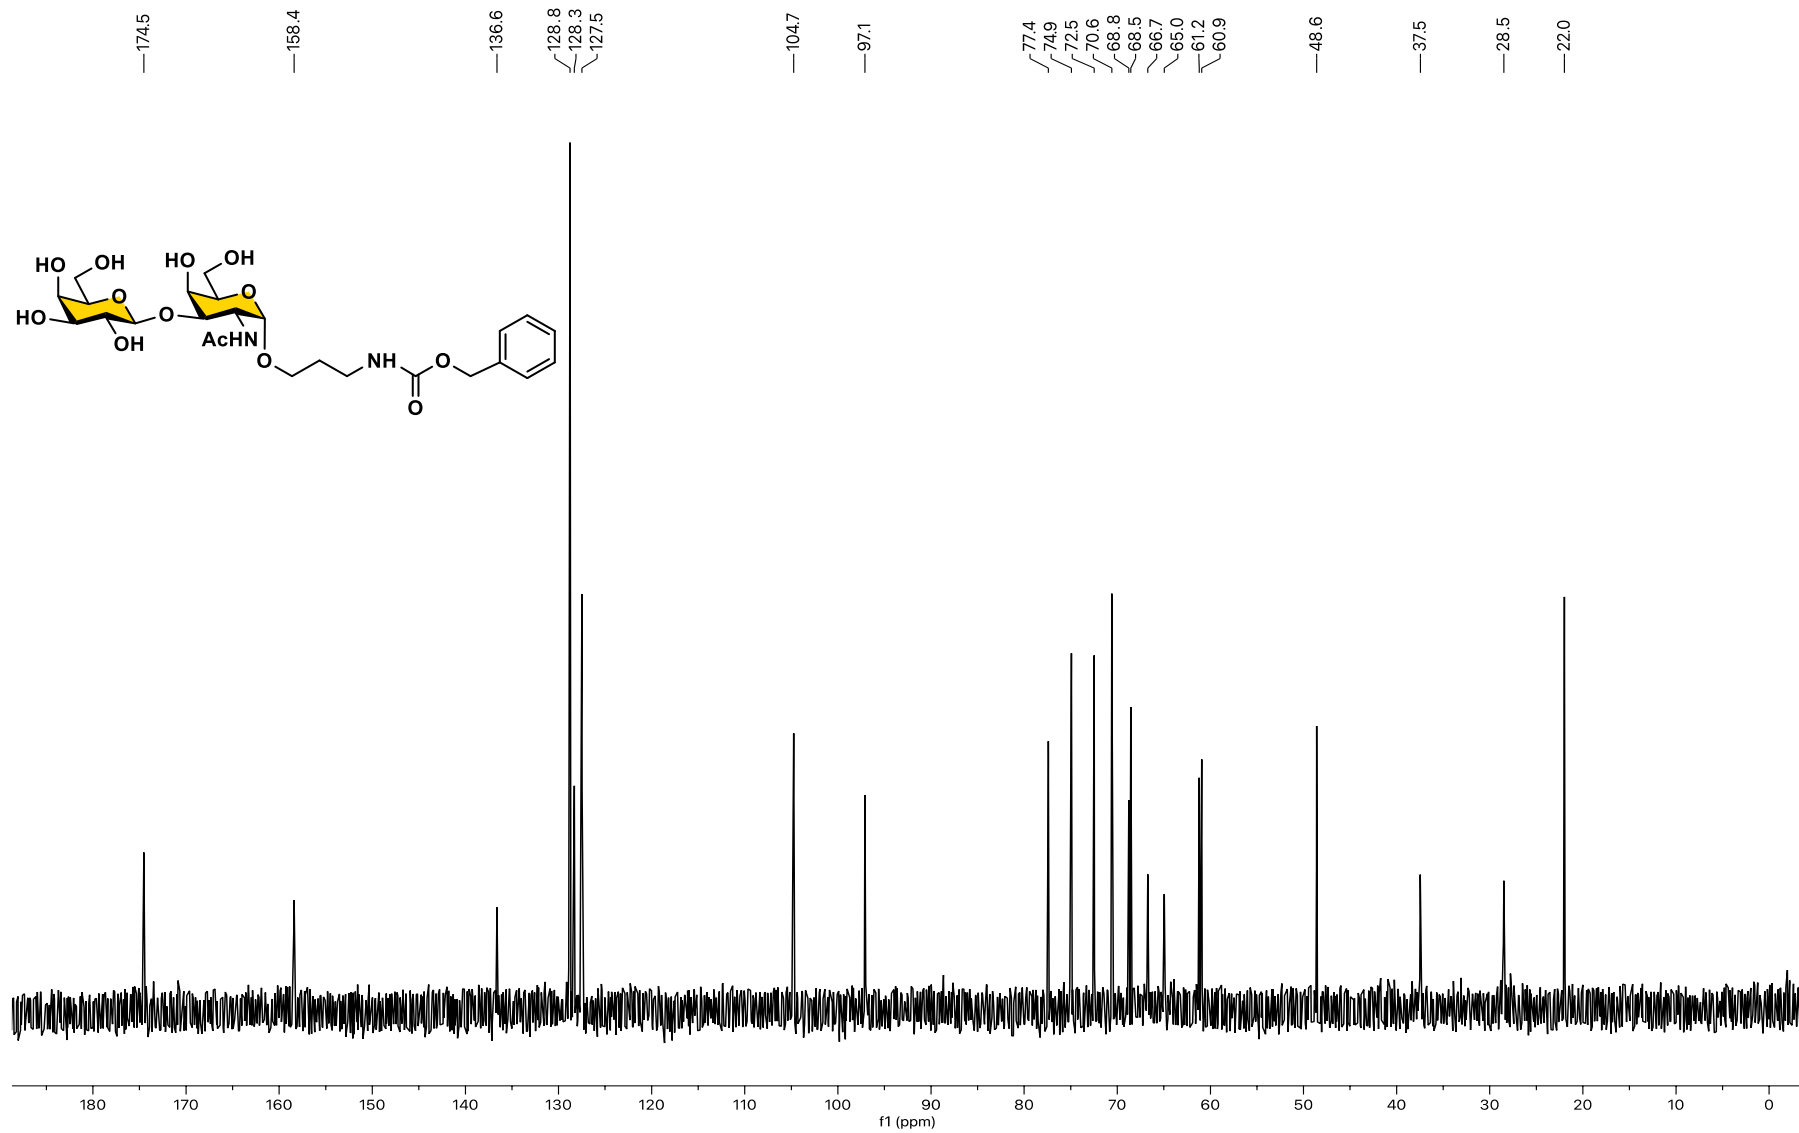

$^1\text{H}$ - $^1\text{H}$  COSY NMR Spectra (400 MHz,  $\text{D}_2\text{O}$ ) of Gal $\beta$ 3GalNAc $\alpha$ ProNHCbz (**3a**)

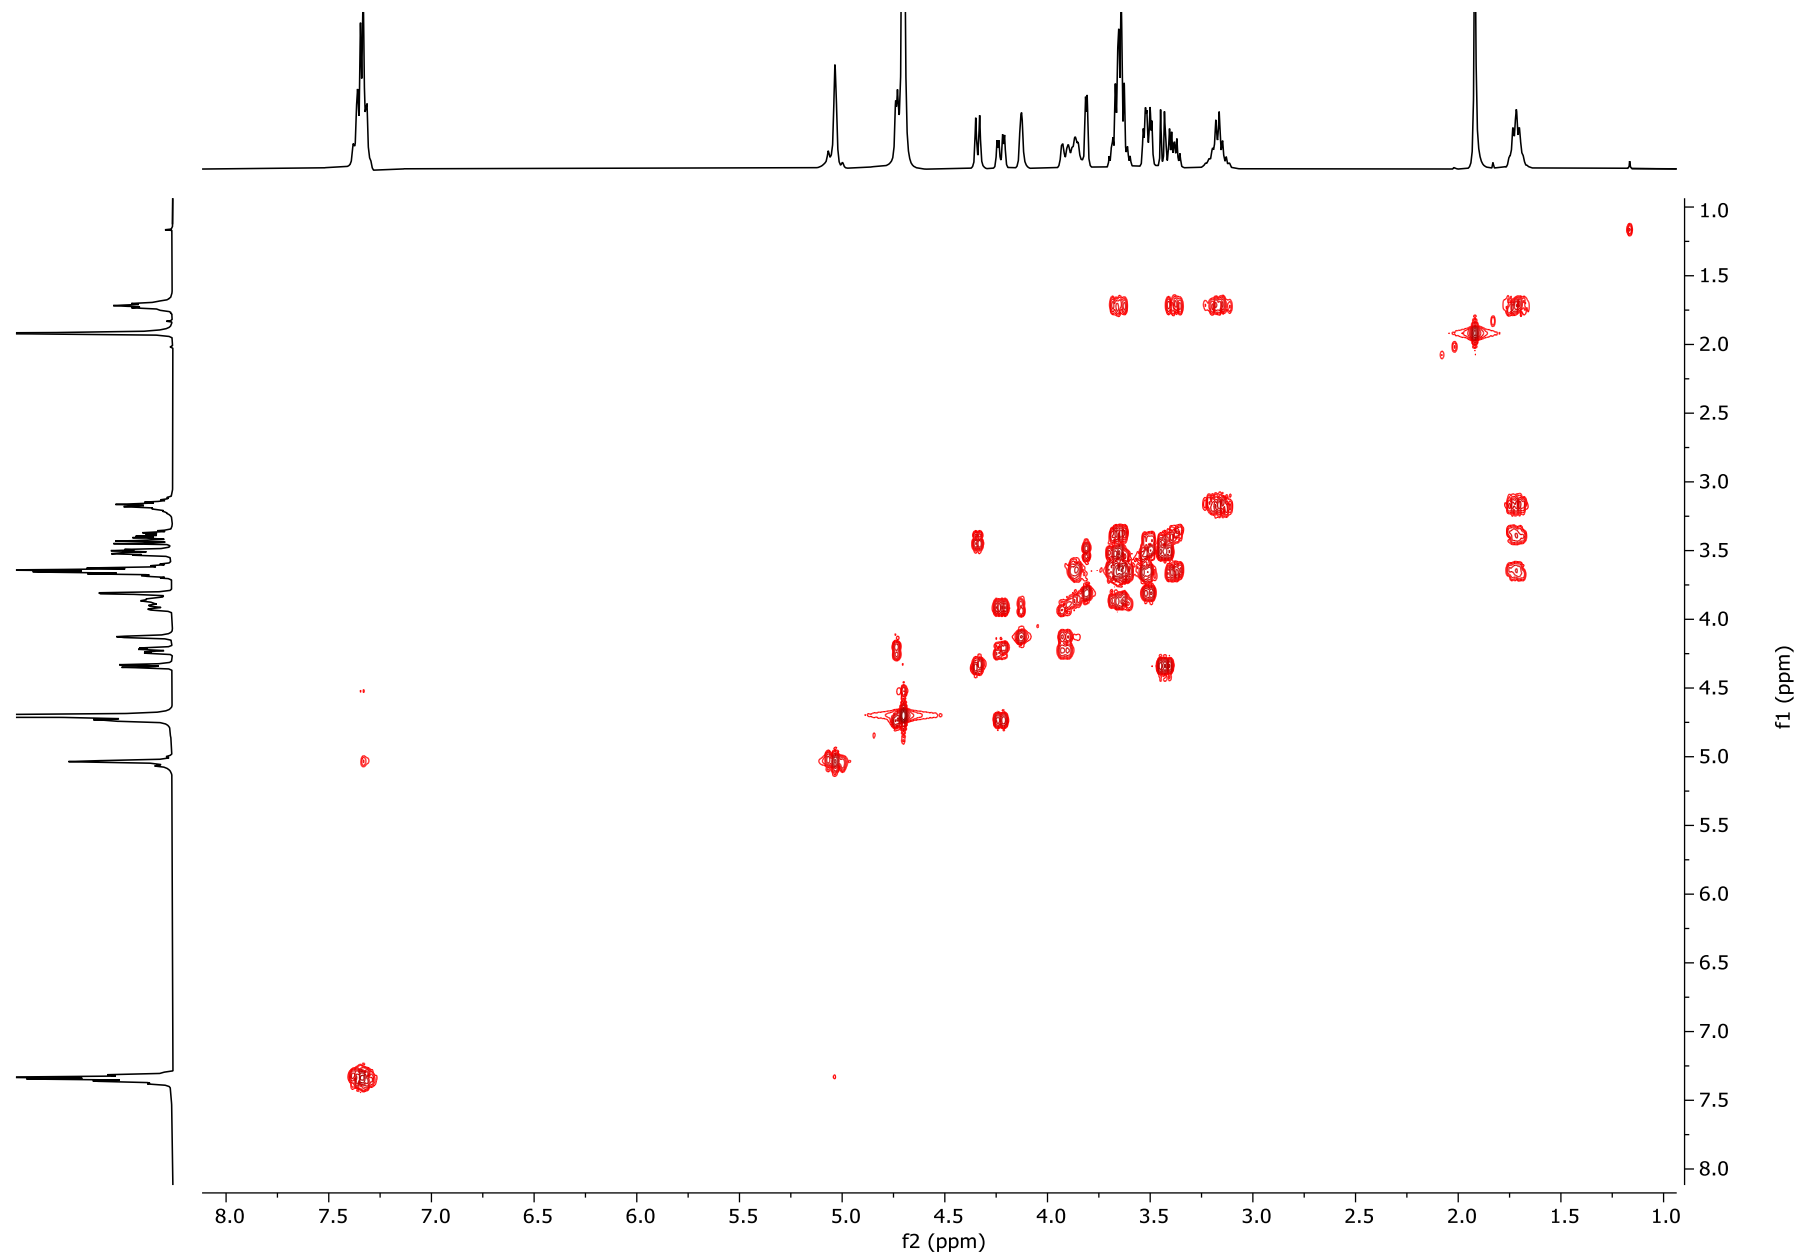

$^1\text{H}$ - $^{13}\text{C}$  HSQC NMR Spectra (400 MHz,  $\text{D}_2\text{O}$ ) of Gal $\beta$ 3GalNAc $\alpha$ ProNHCbz (**3a**)

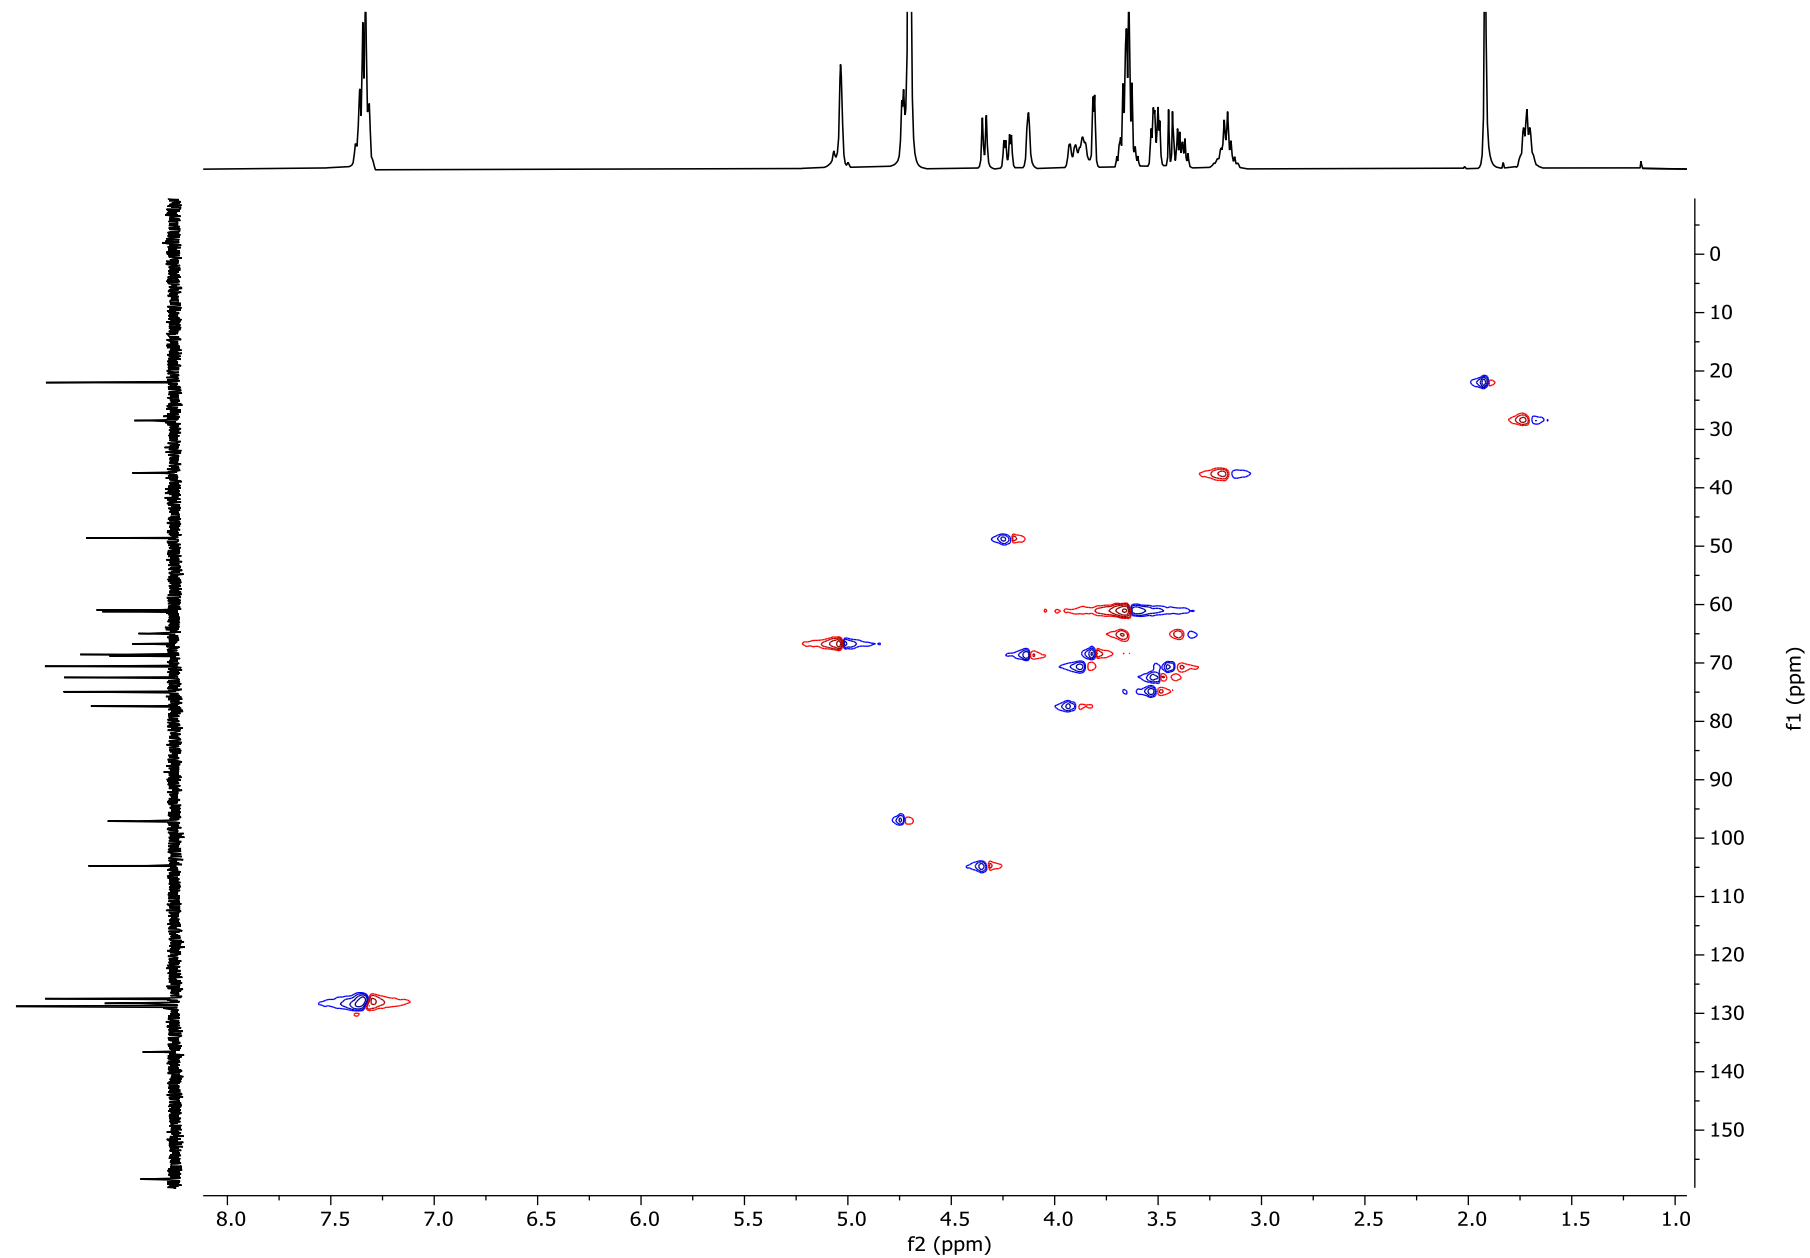

<sup>1</sup>H NMR Spectra (400 MHz, D<sub>2</sub>O) of Galβ3GalNAcβProNHCbz (**3b**)

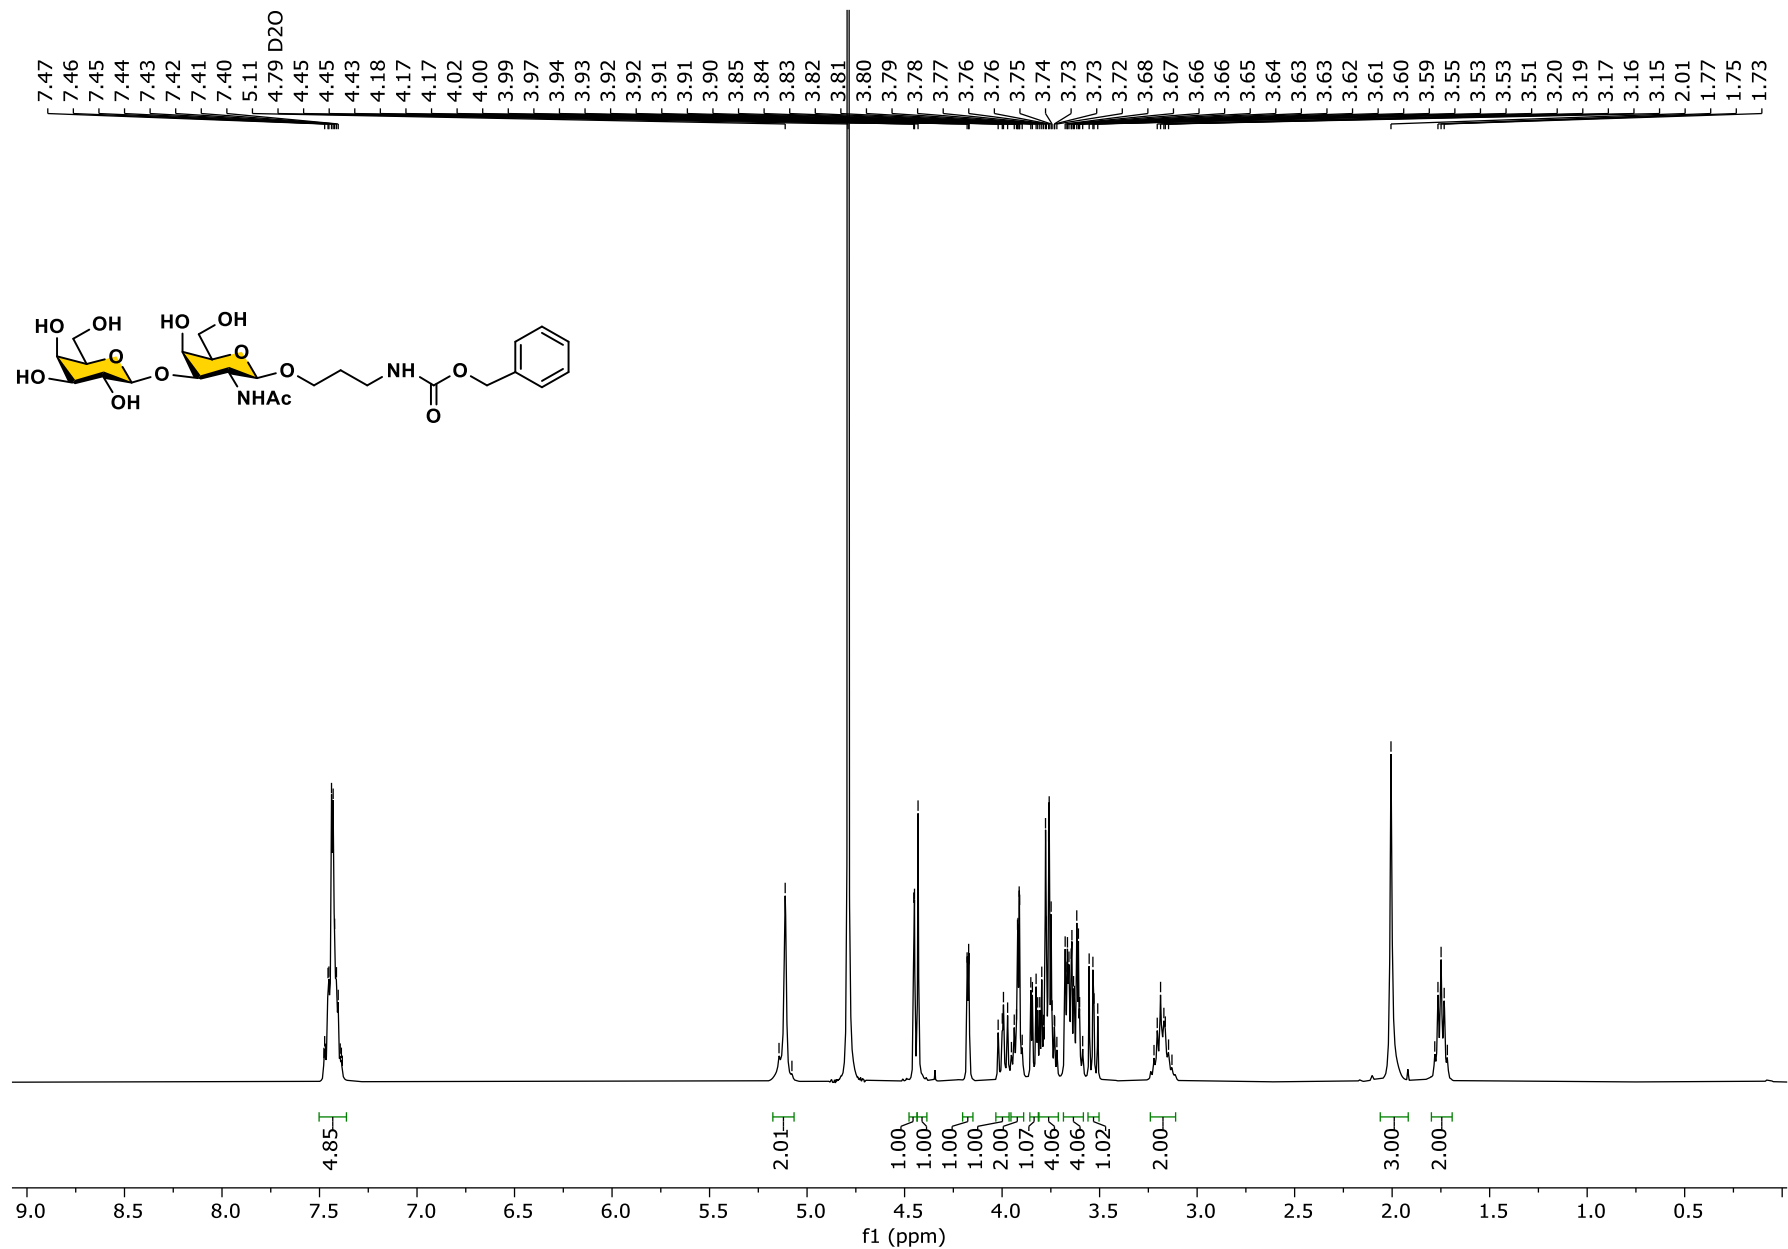

$^{13}\text{C}$  NMR Spectra (400 MHz,  $\text{D}_2\text{O}$ ) of Gal $\beta$ 3GalNAc $\beta$ ProNHCBz (**3b**)

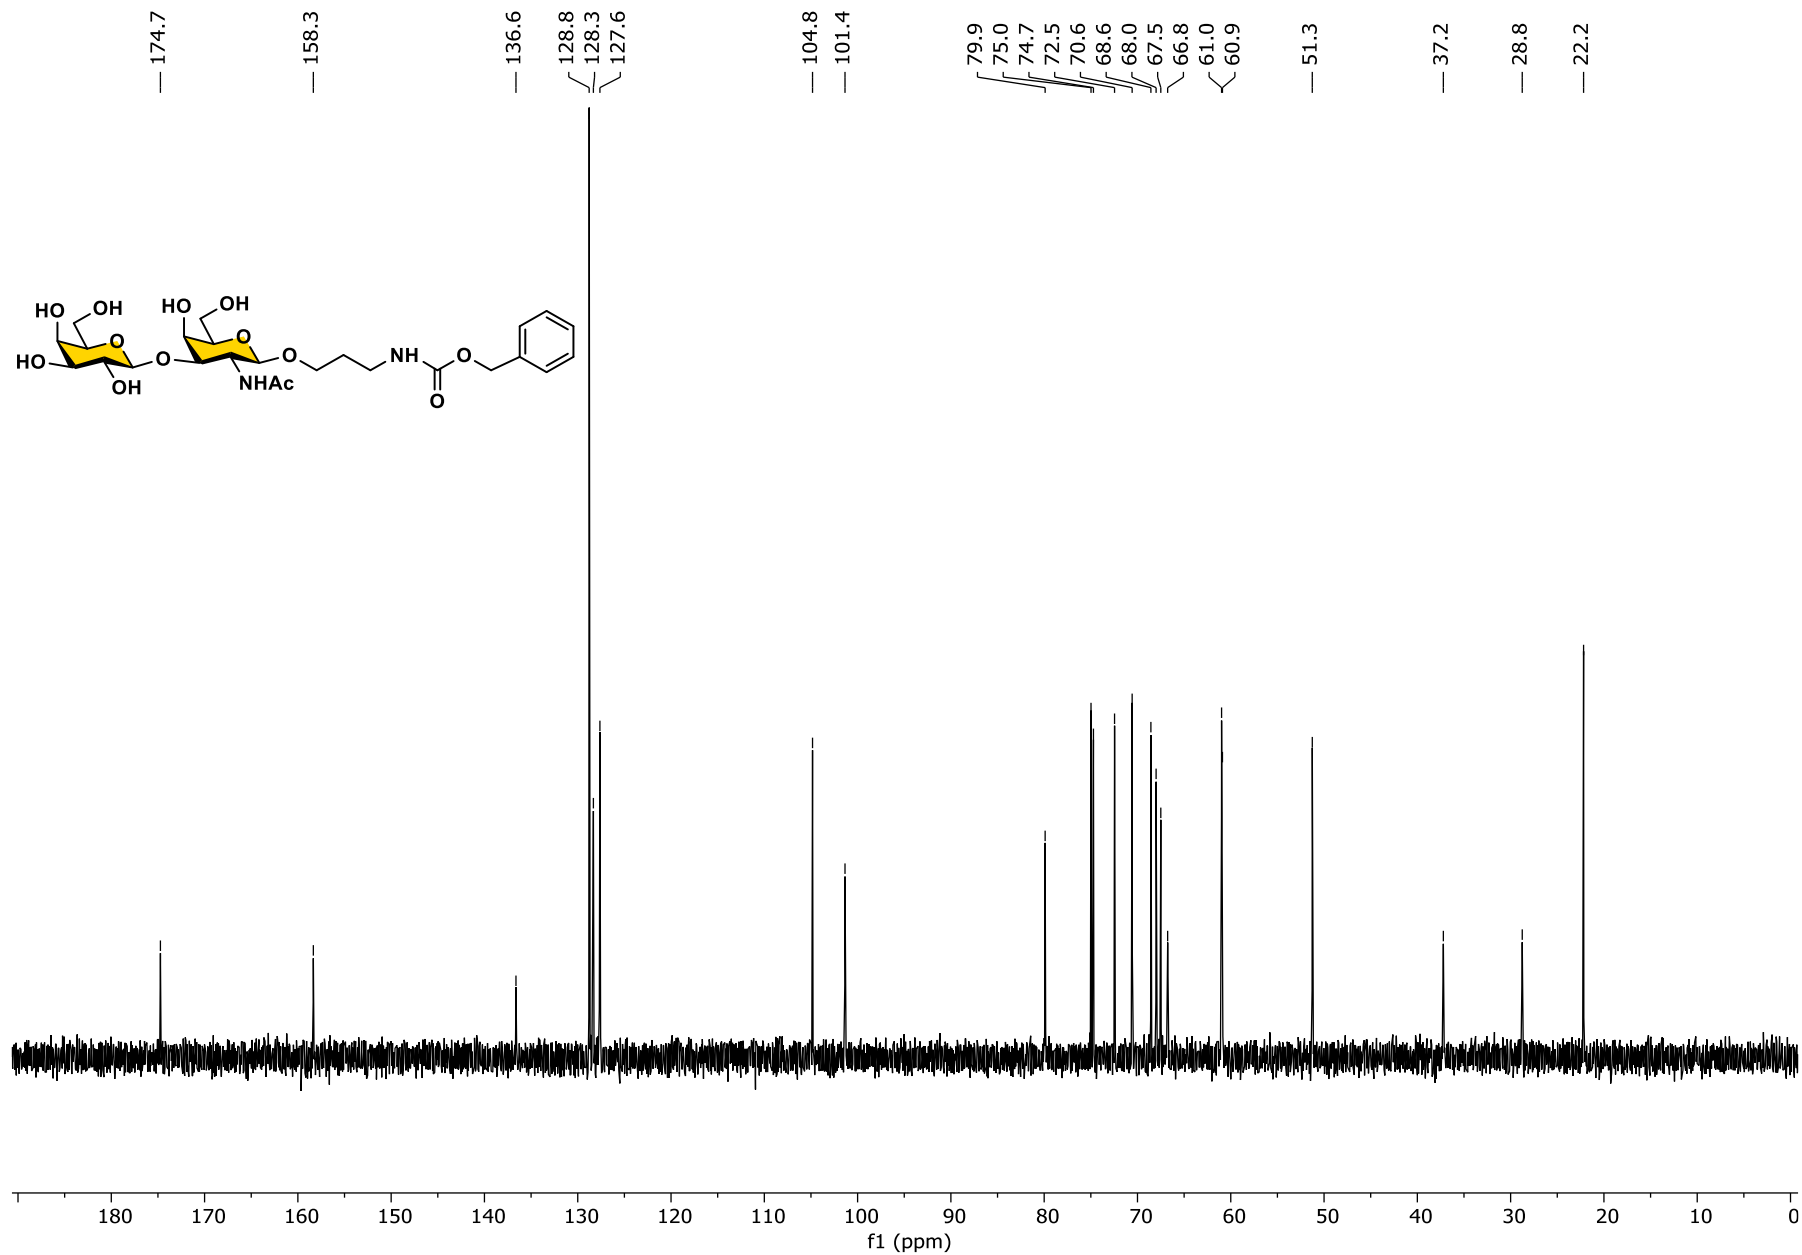

$^1\text{H}$ - $^1\text{H}$  COSY NMR Spectra (400 MHz,  $\text{D}_2\text{O}$ ) of Gal $\beta$ 3GalNAc $\beta$ ProNHCbz (**3b**)

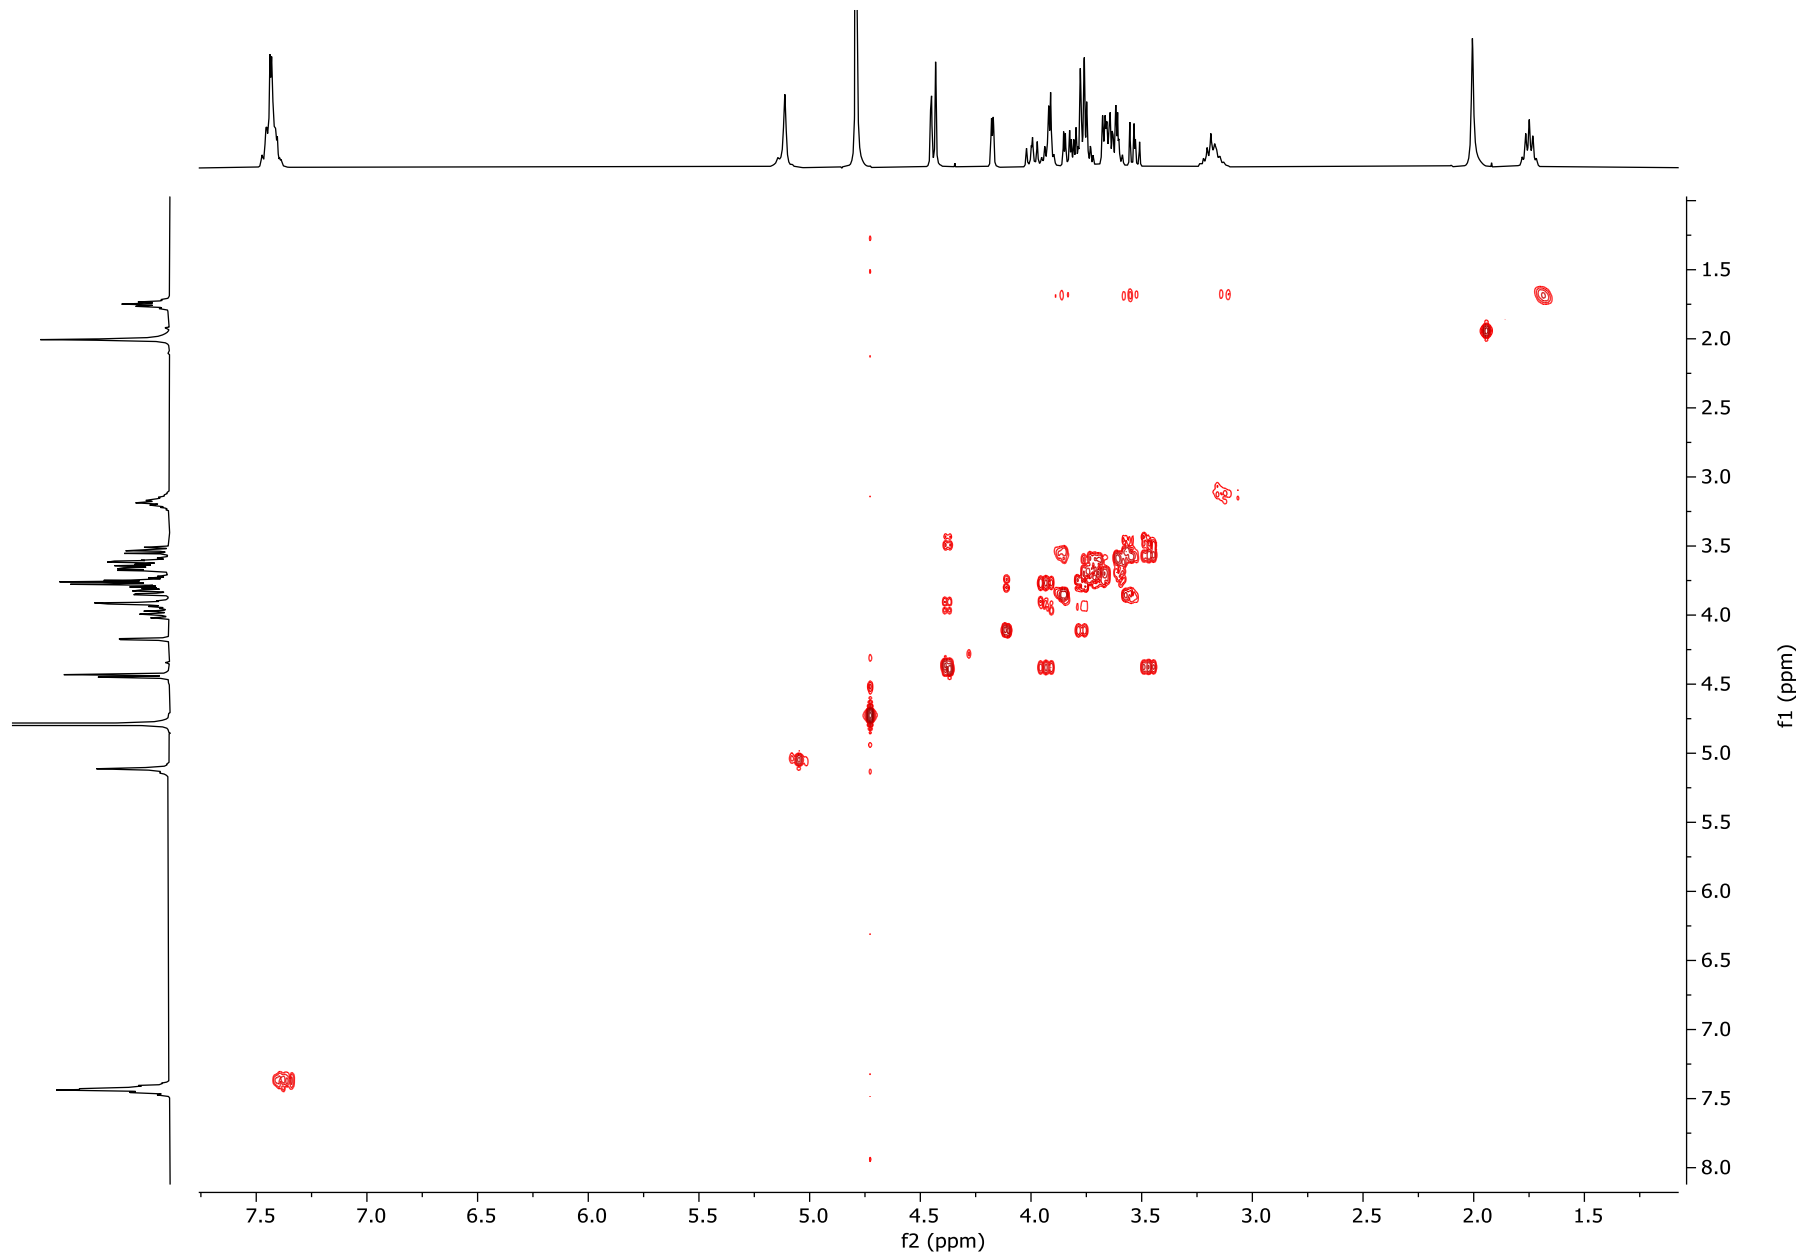

S31

$^1\text{H}$ - $^{13}\text{C}$  HSQC NMR Spectra (400 MHz,  $\text{D}_2\text{O}$ ) of Gal $\beta$ 3GalNAc $\beta$ ProNHCbz (**3b**)

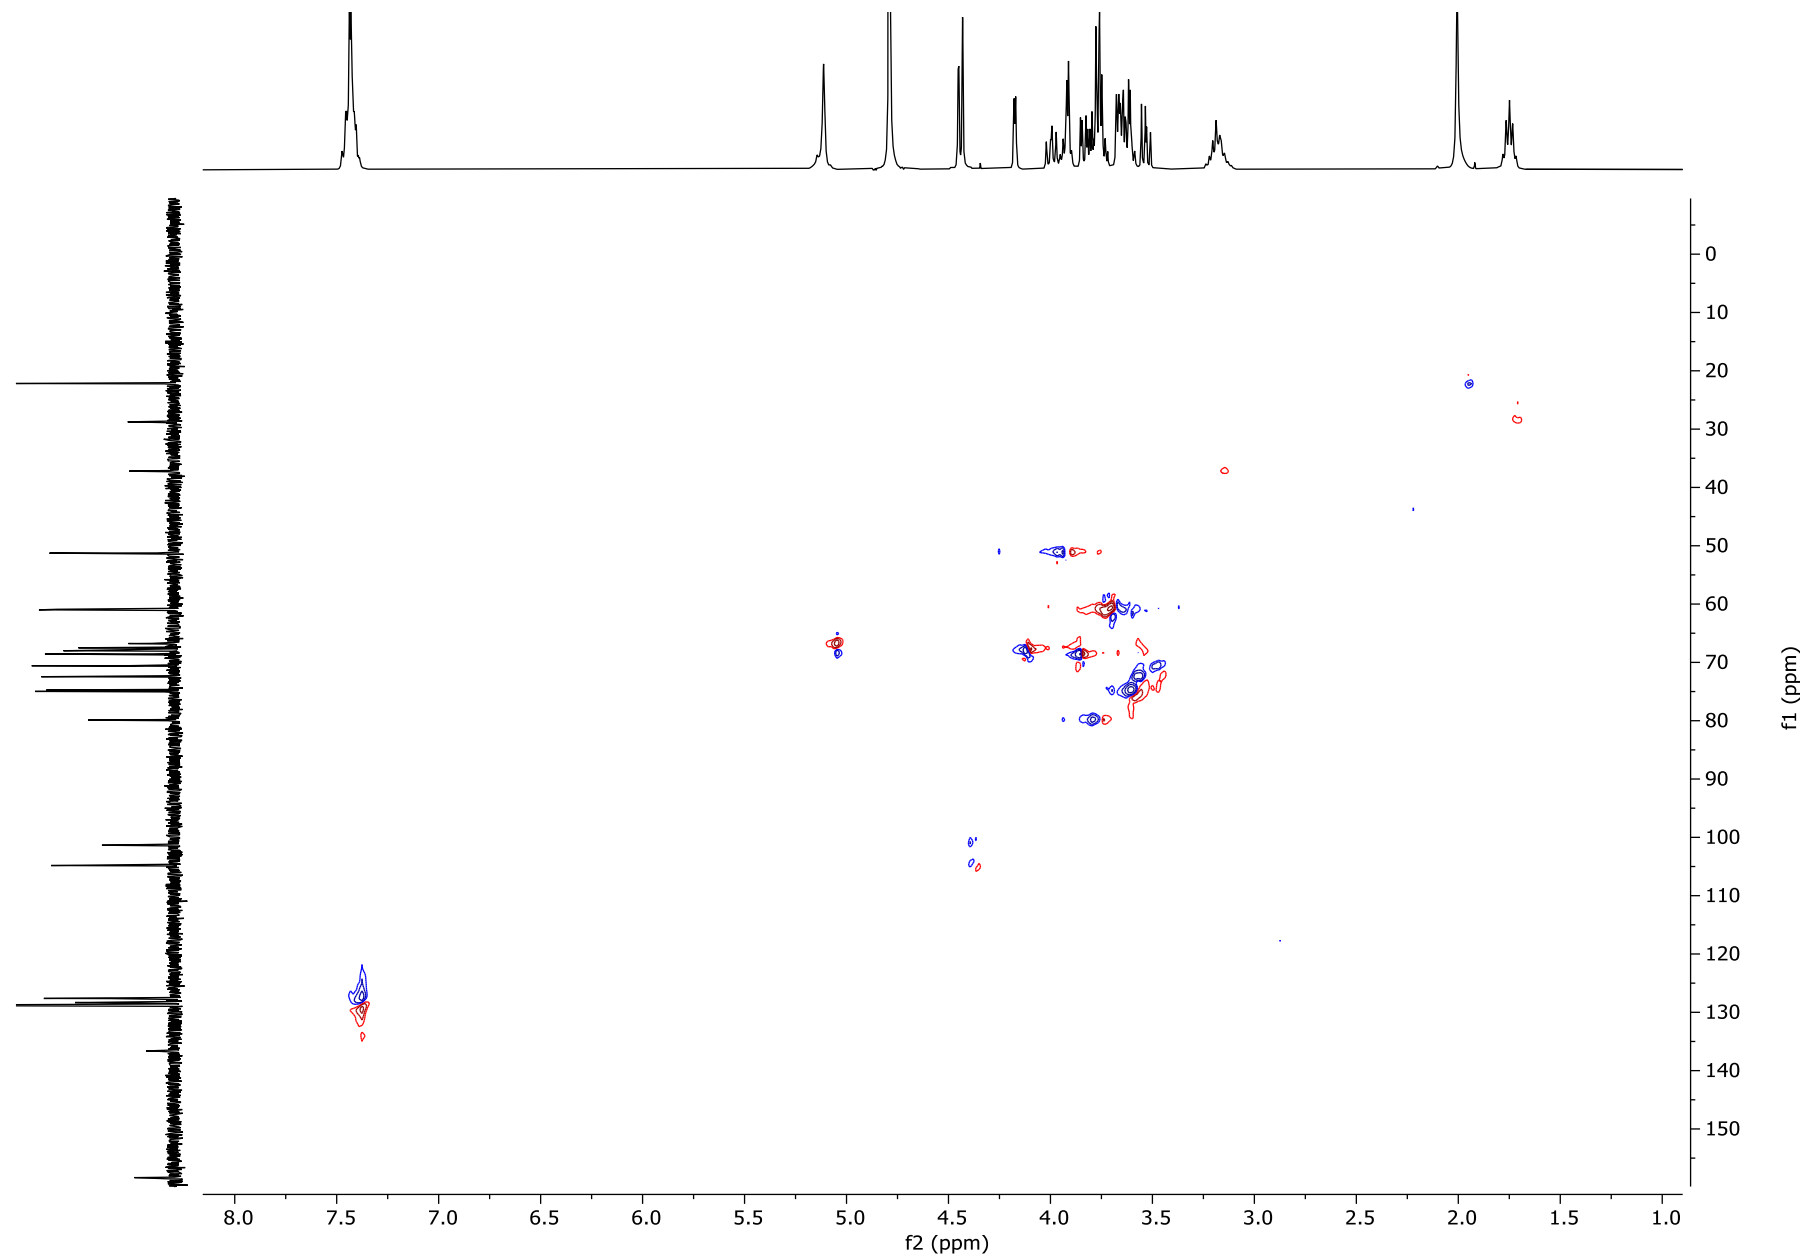



$^1\text{H}$  NMR Spectra (400 MHz,  $\text{D}_2\text{O}$ ) of GalNAc $\beta$ 3Gal $\alpha$ ProNHCbz (**4a**)

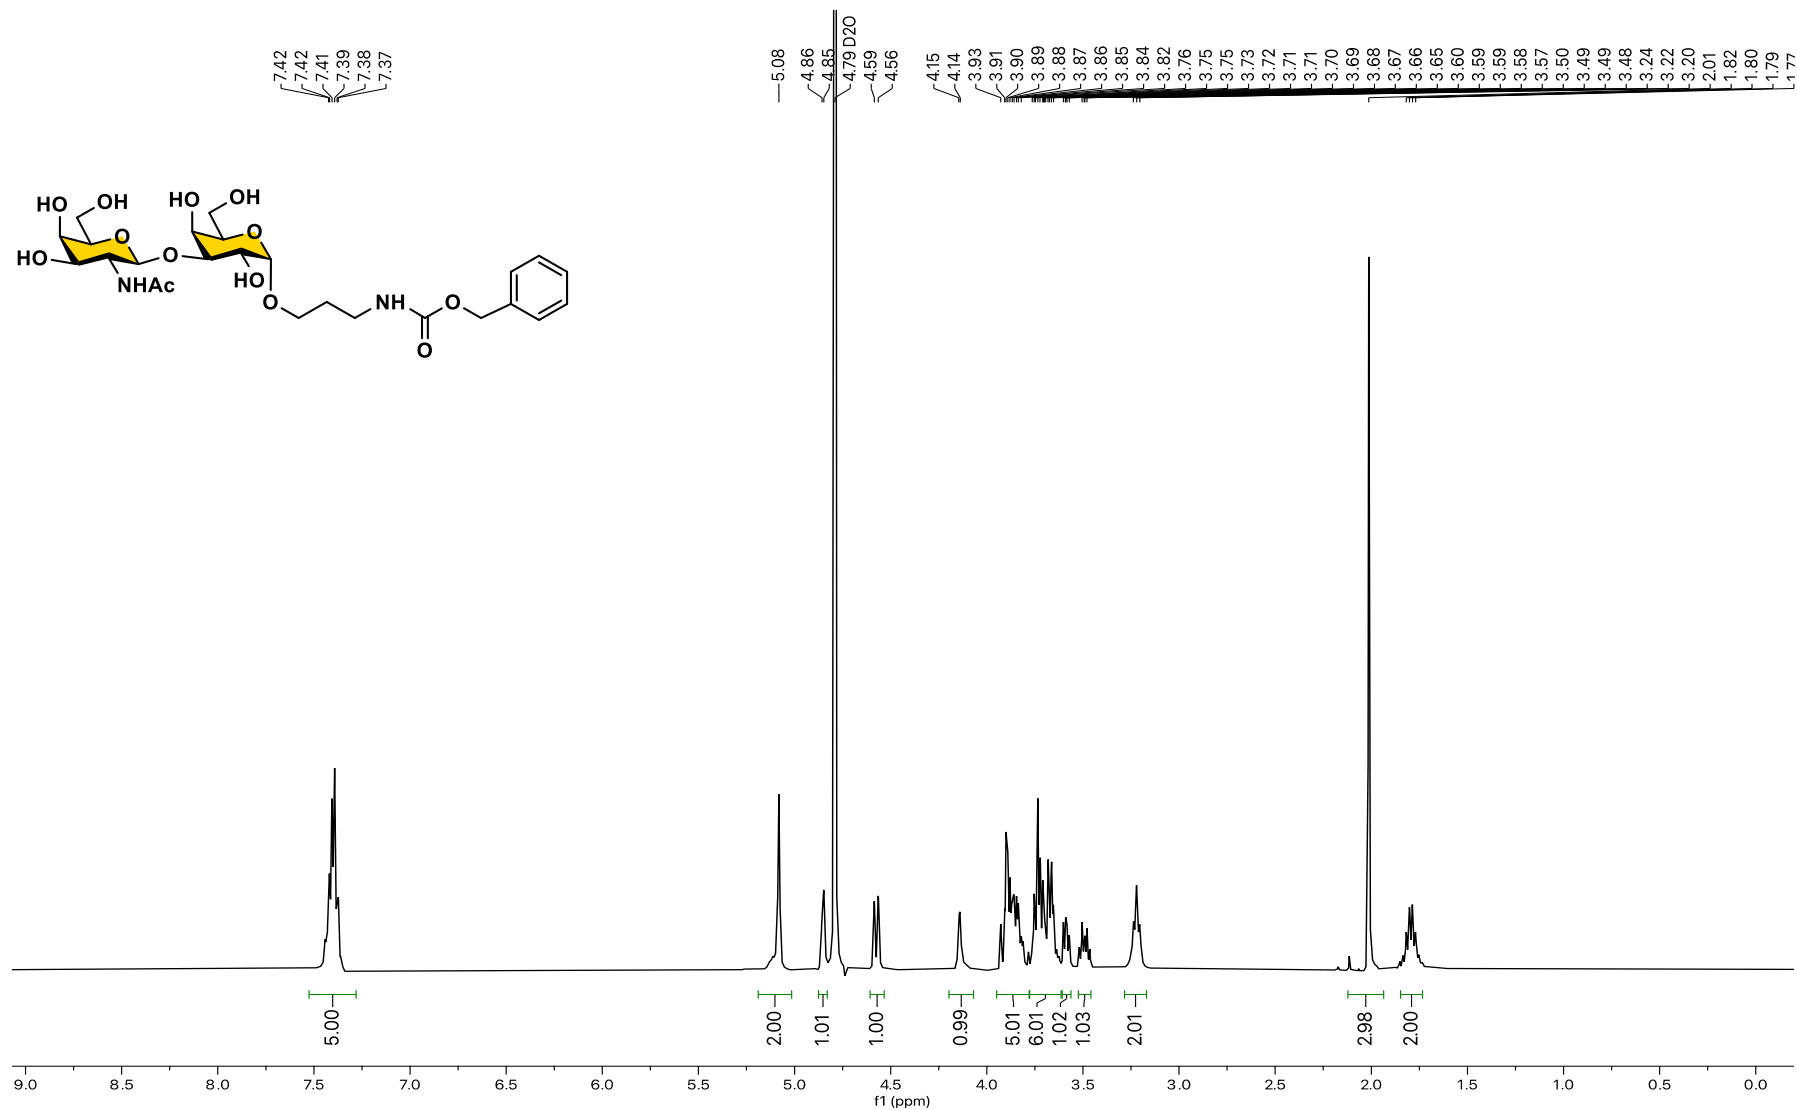

<sup>13</sup>C NMR Spectra (400 MHz, D<sub>2</sub>O) of GalNAcβ3GalαProNHCbz (**4a**)

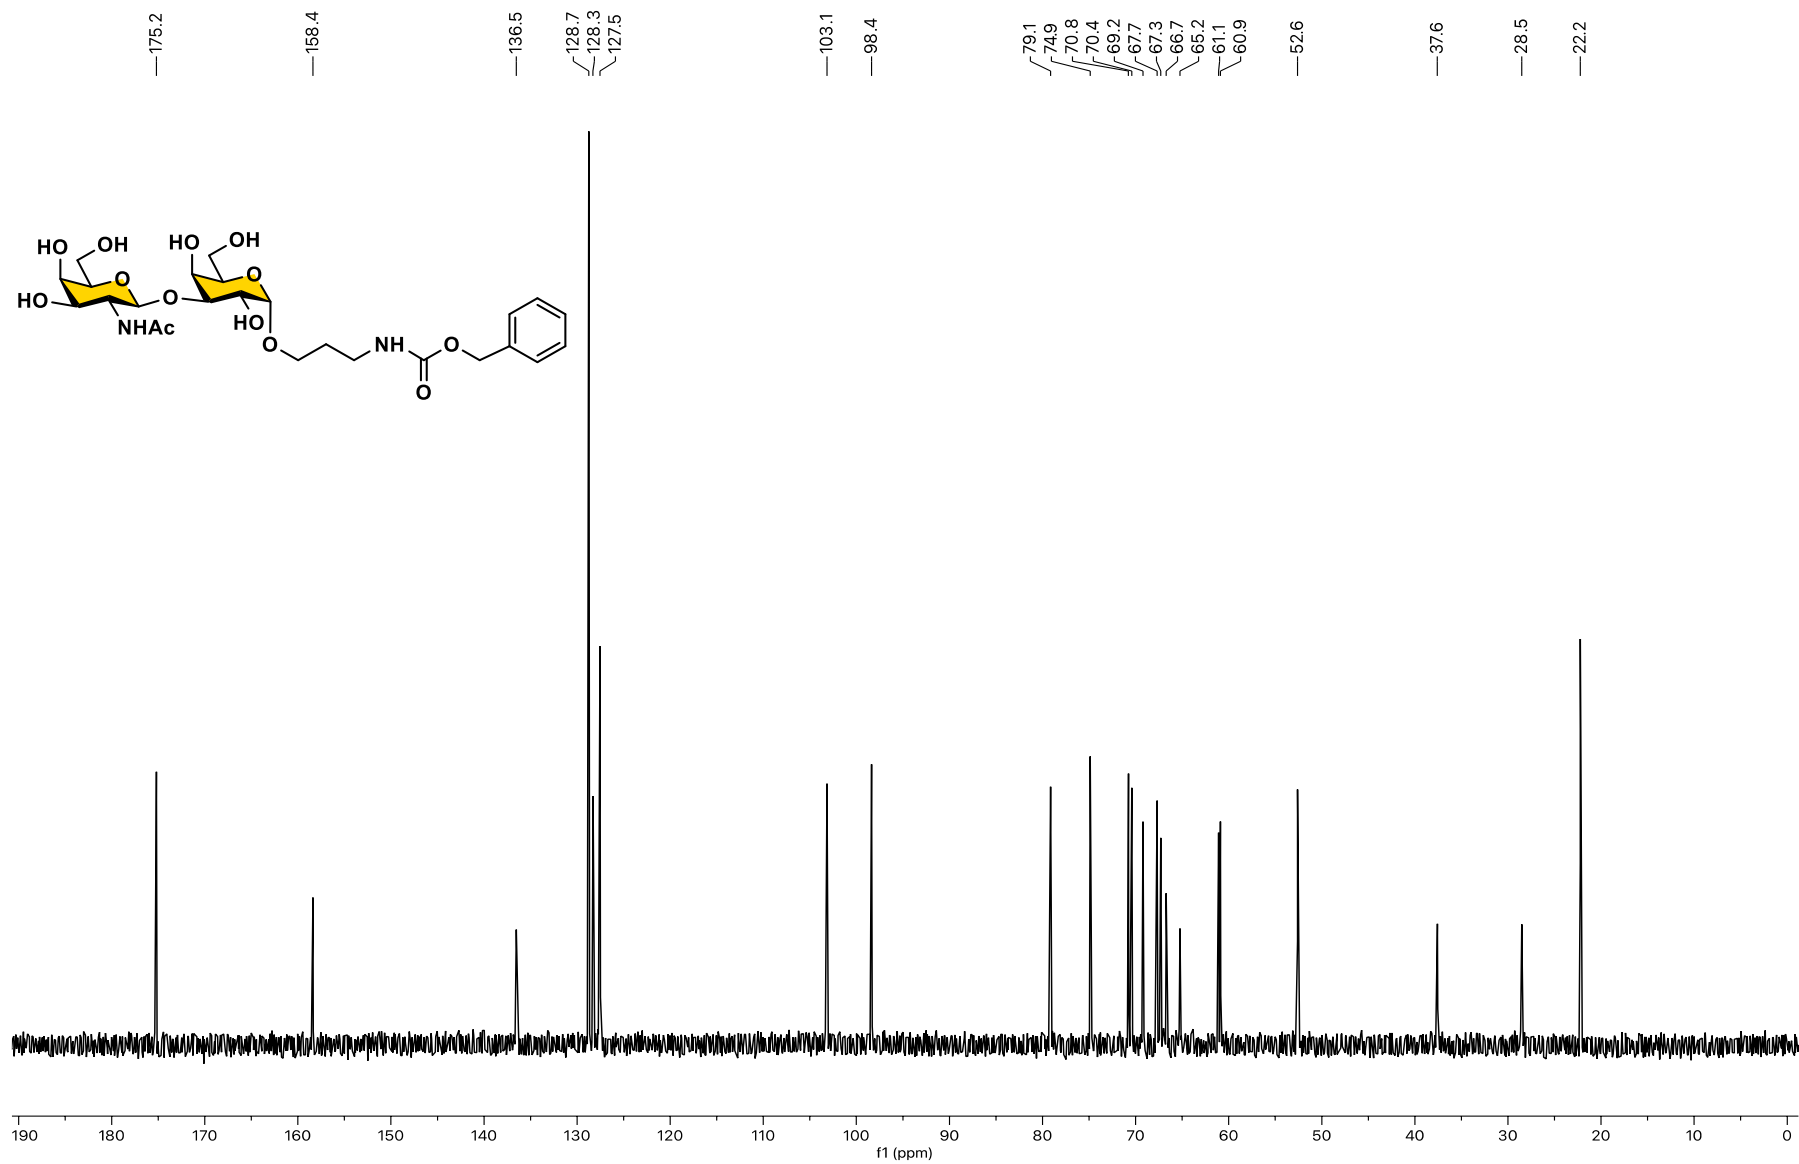

$^1\text{H}$ - $^1\text{H}$  COSY NMR Spectra (400 MHz,  $\text{D}_2\text{O}$ ) of GalNAc $\beta$ 3Gal $\alpha$ ProNHCbz (**4a**)

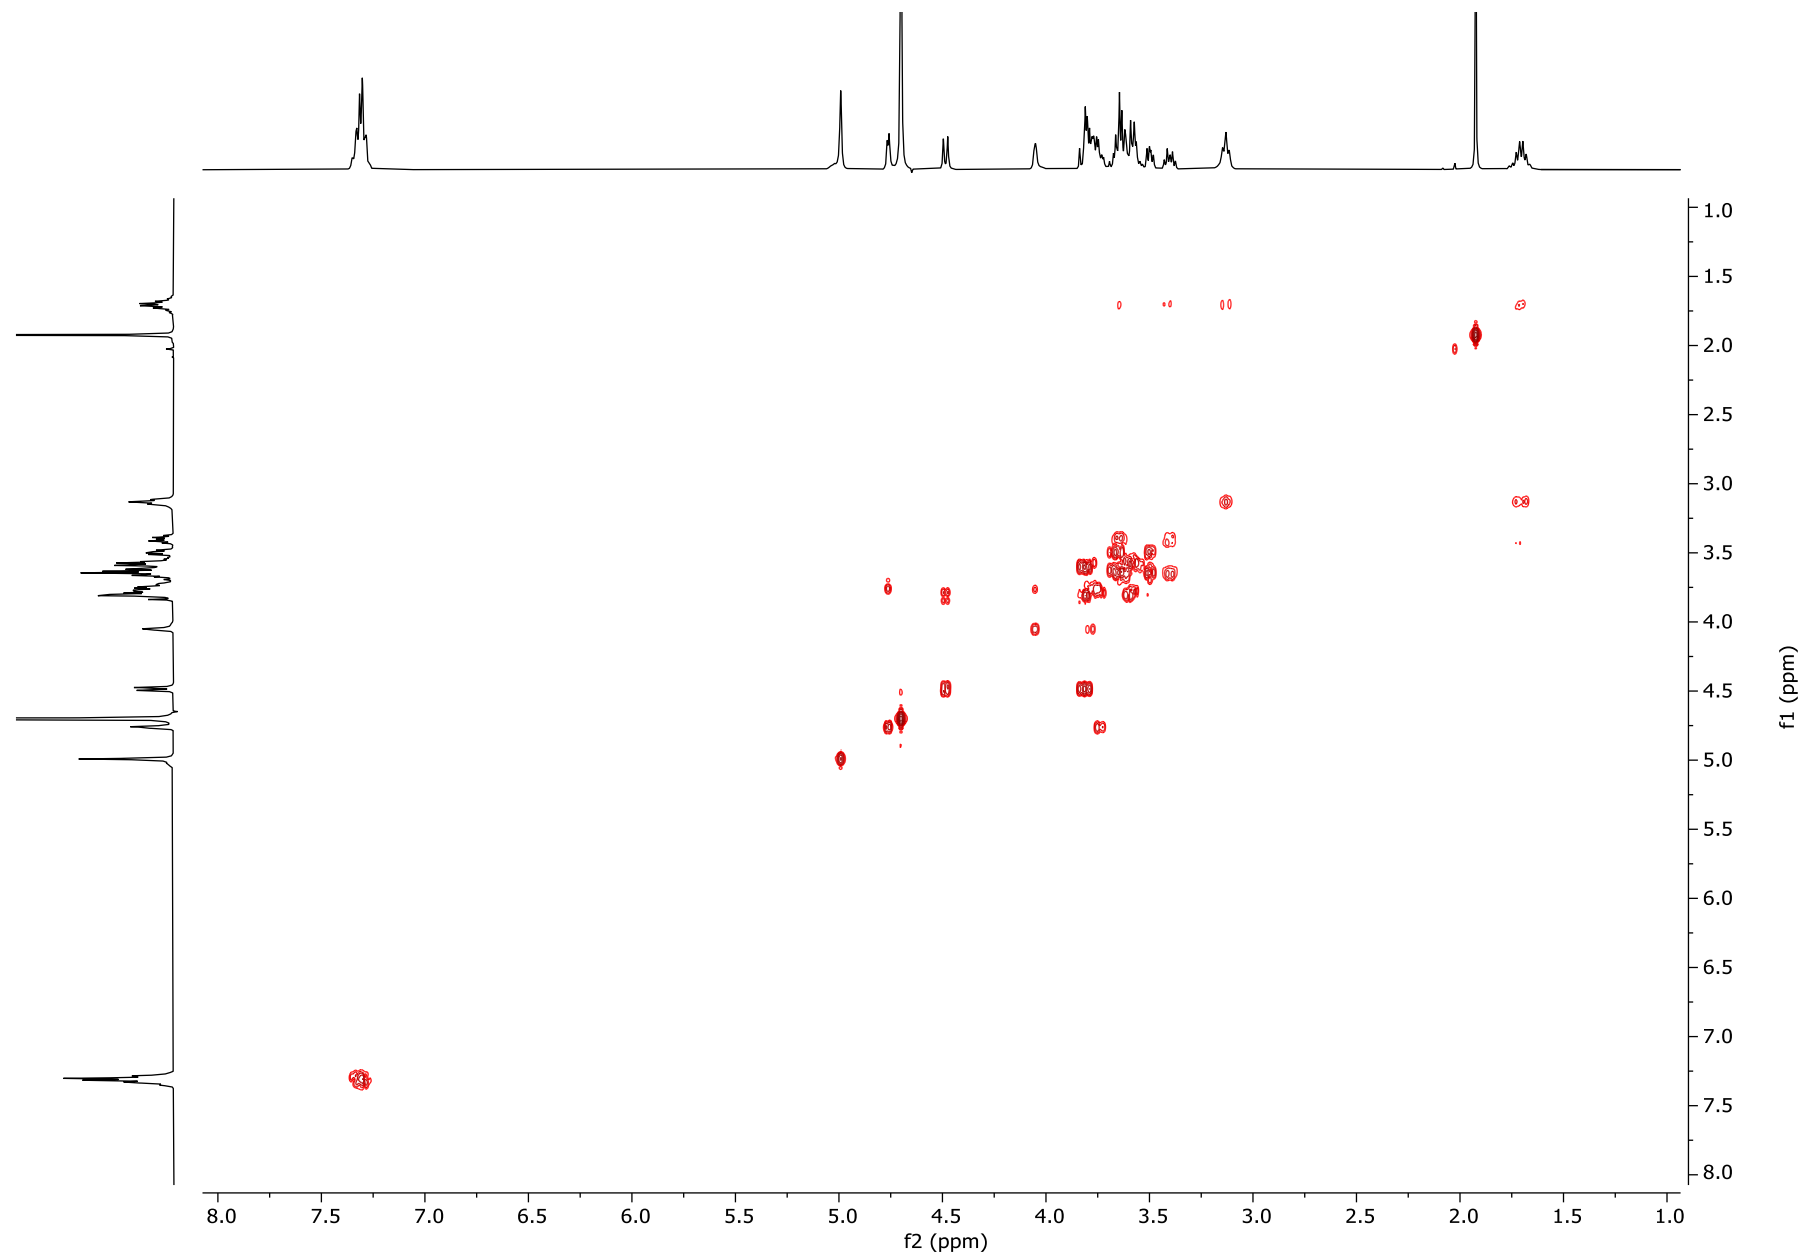

$^1\text{H}$ - $^{13}\text{C}$  HSQC NMR Spectra (400 MHz,  $\text{D}_2\text{O}$ ) of GalNAc $\beta$ 3Gal $\alpha$ ProNHCbz (**4a**)

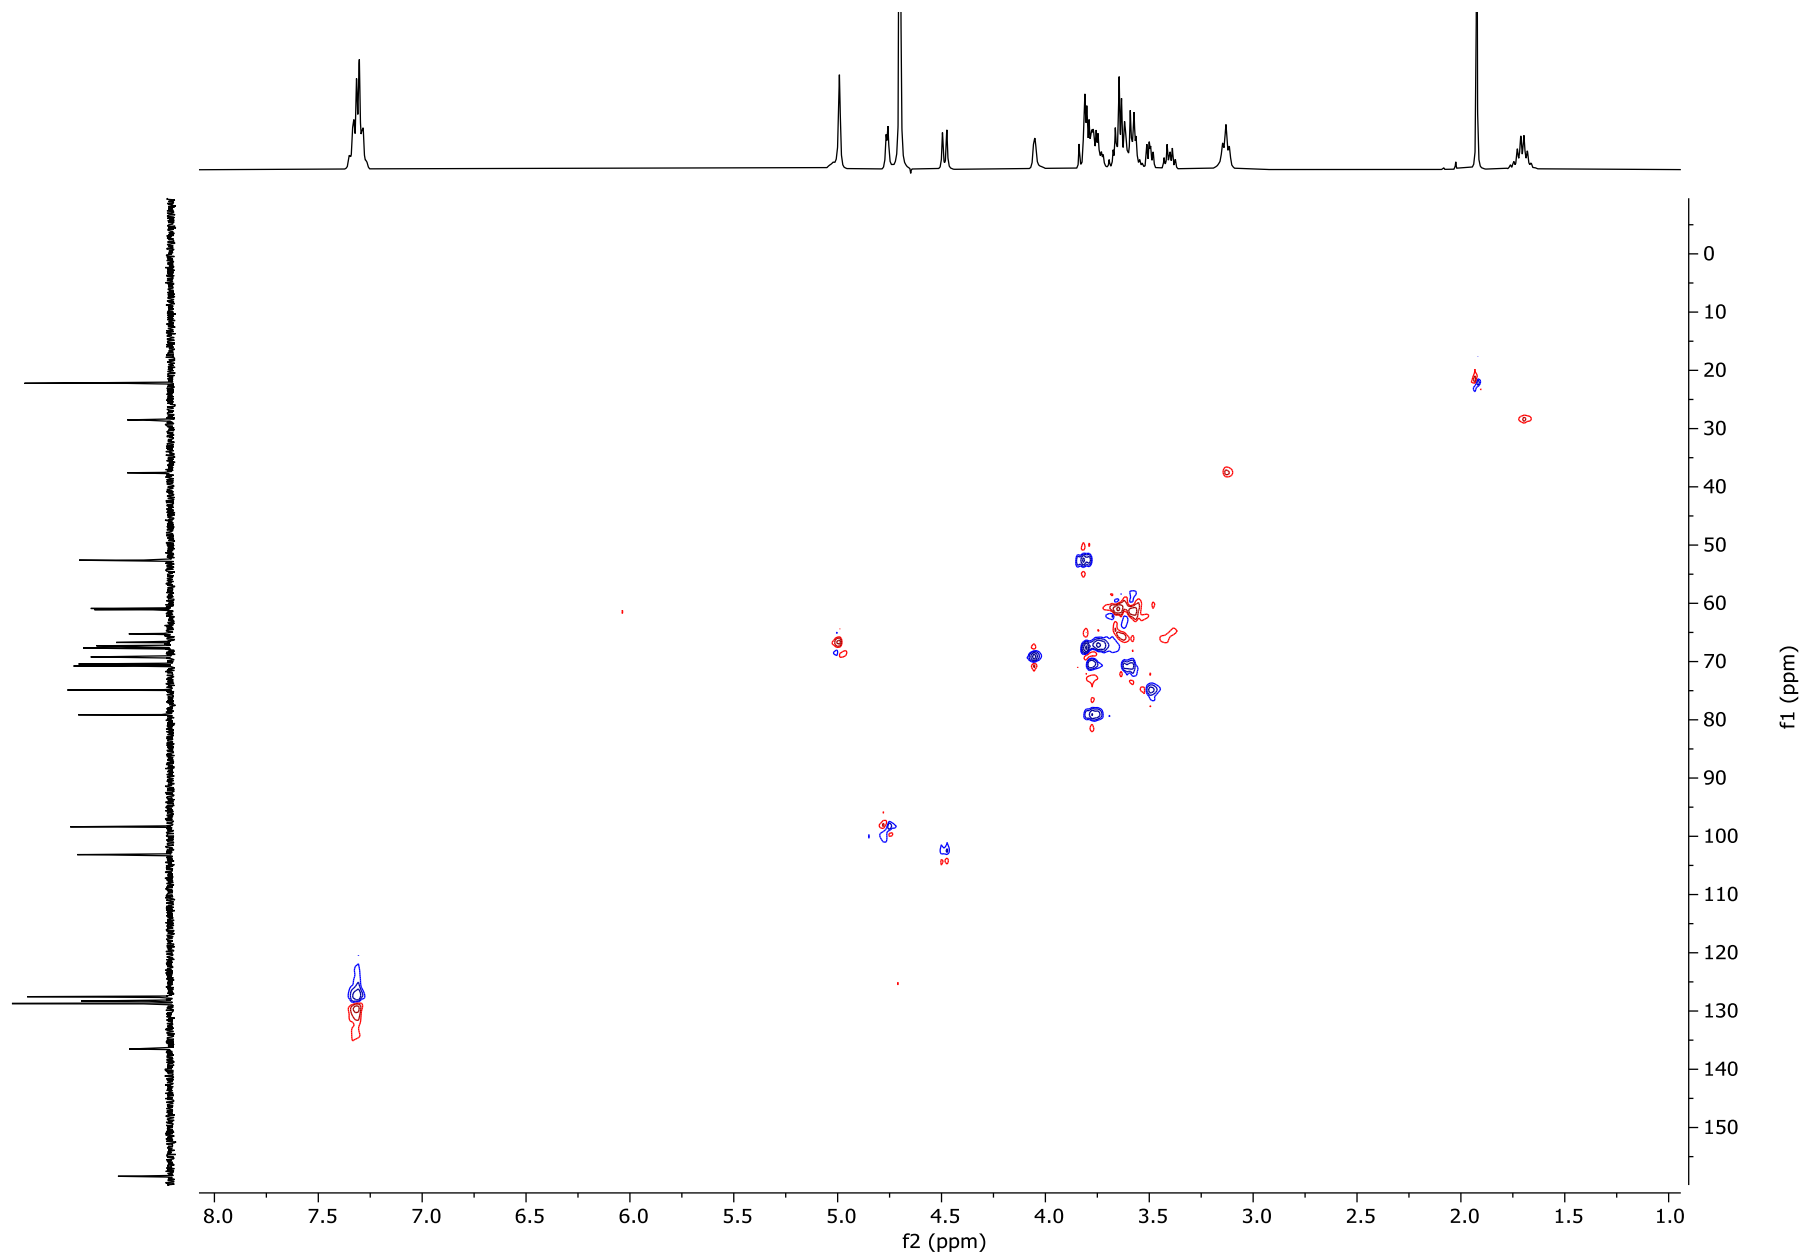

$^1\text{H}$  NMR Spectra (400 MHz,  $\text{D}_2\text{O}$ ) of GalNAc $\beta$ 3Gal $\beta$ ProNHCbz (**4b**)

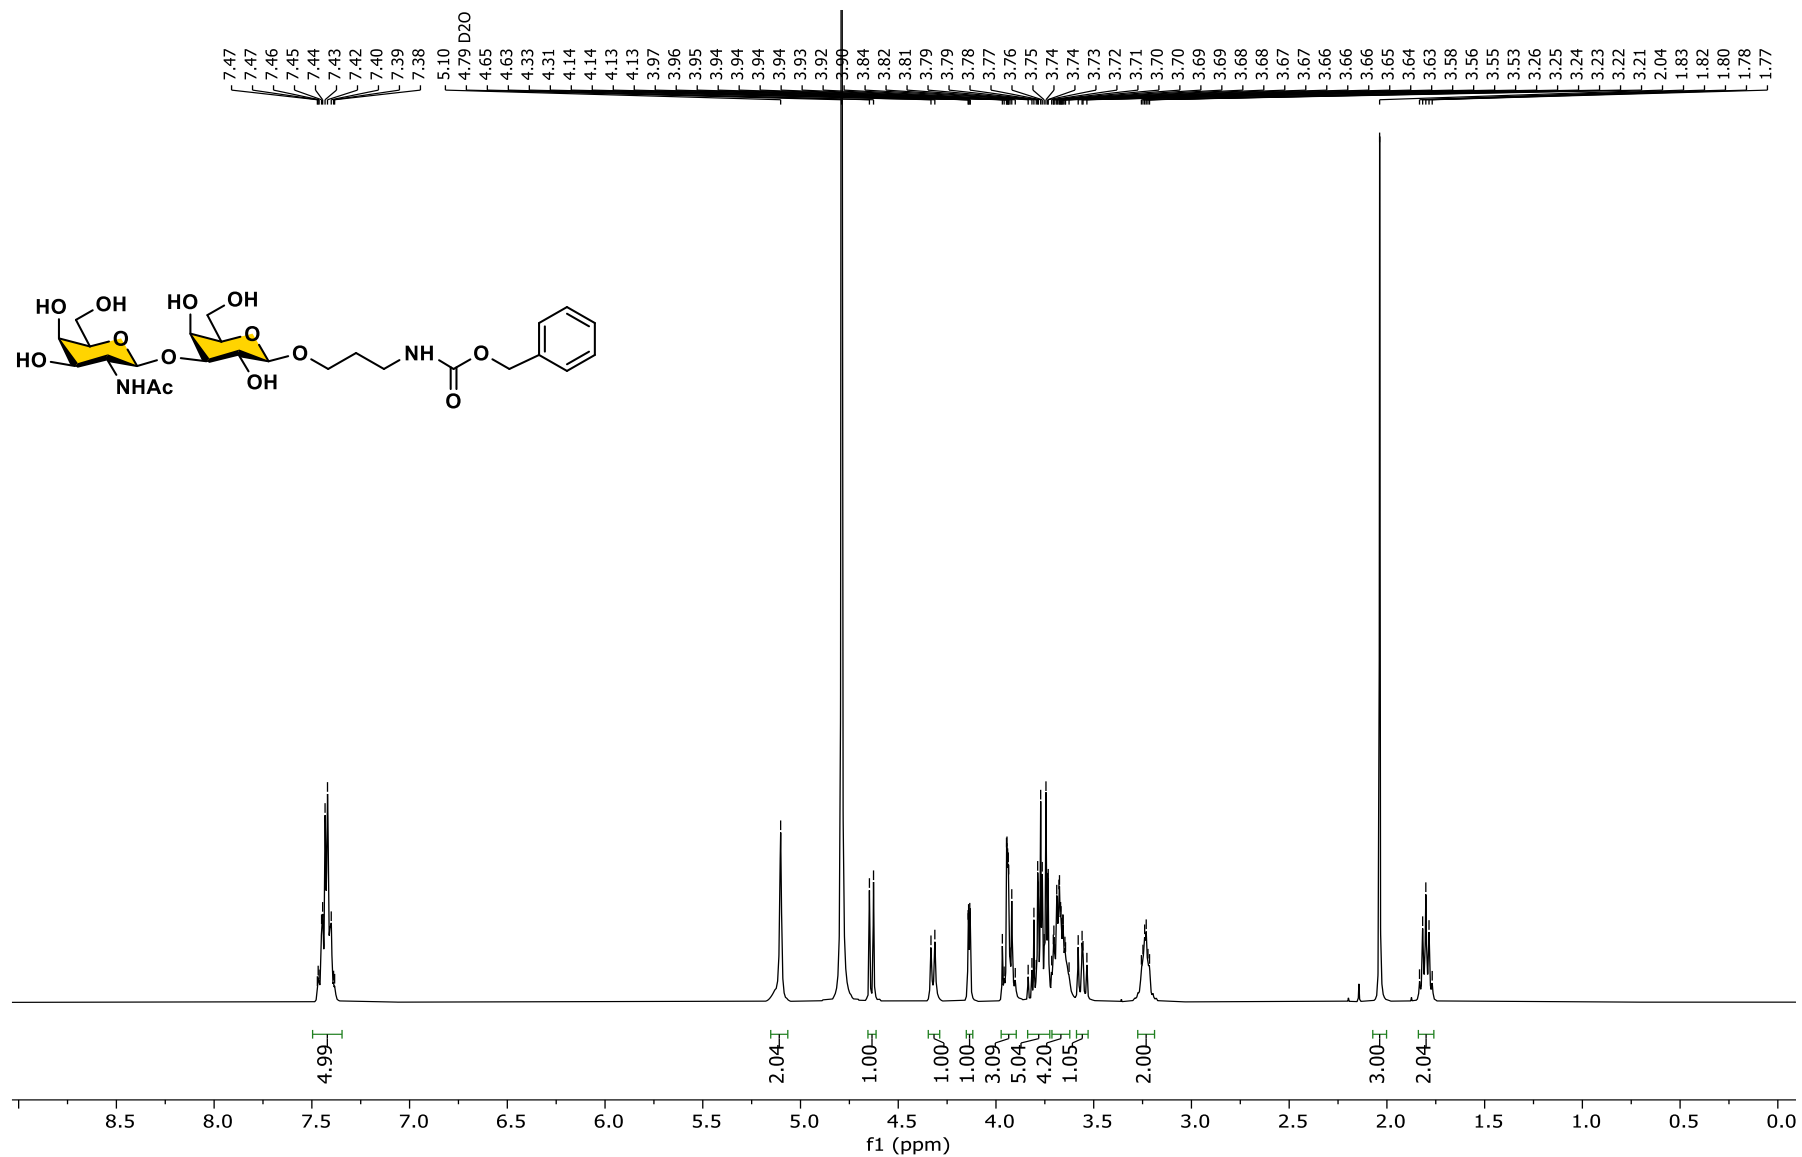

<sup>13</sup>C NMR Spectra (400 MHz, D<sub>2</sub>O) of GalNAcβ3GalβProNHCbz (**4b**)

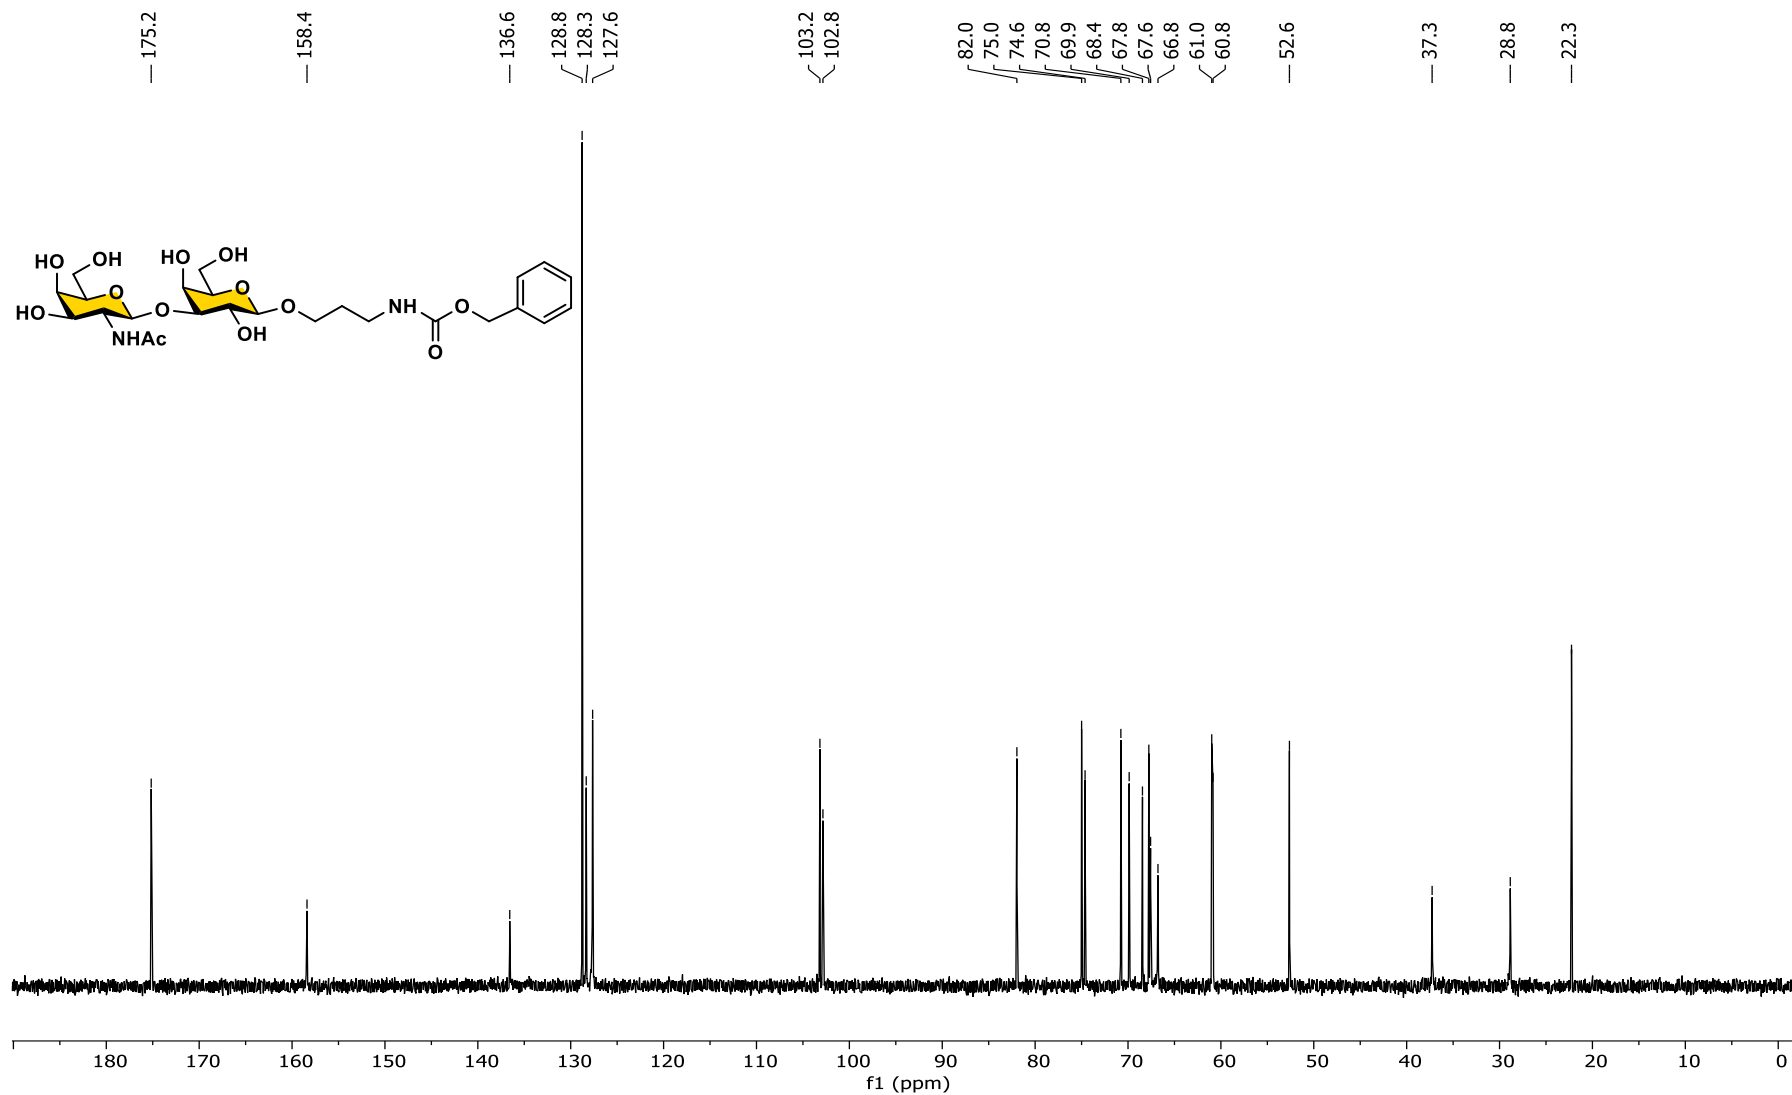

$^1\text{H}$ - $^1\text{H}$  COSY NMR Spectra (400 MHz,  $\text{D}_2\text{O}$ ) of GalNAc $\beta$ 3Gal $\beta$ ProNHCbz (**4b**)

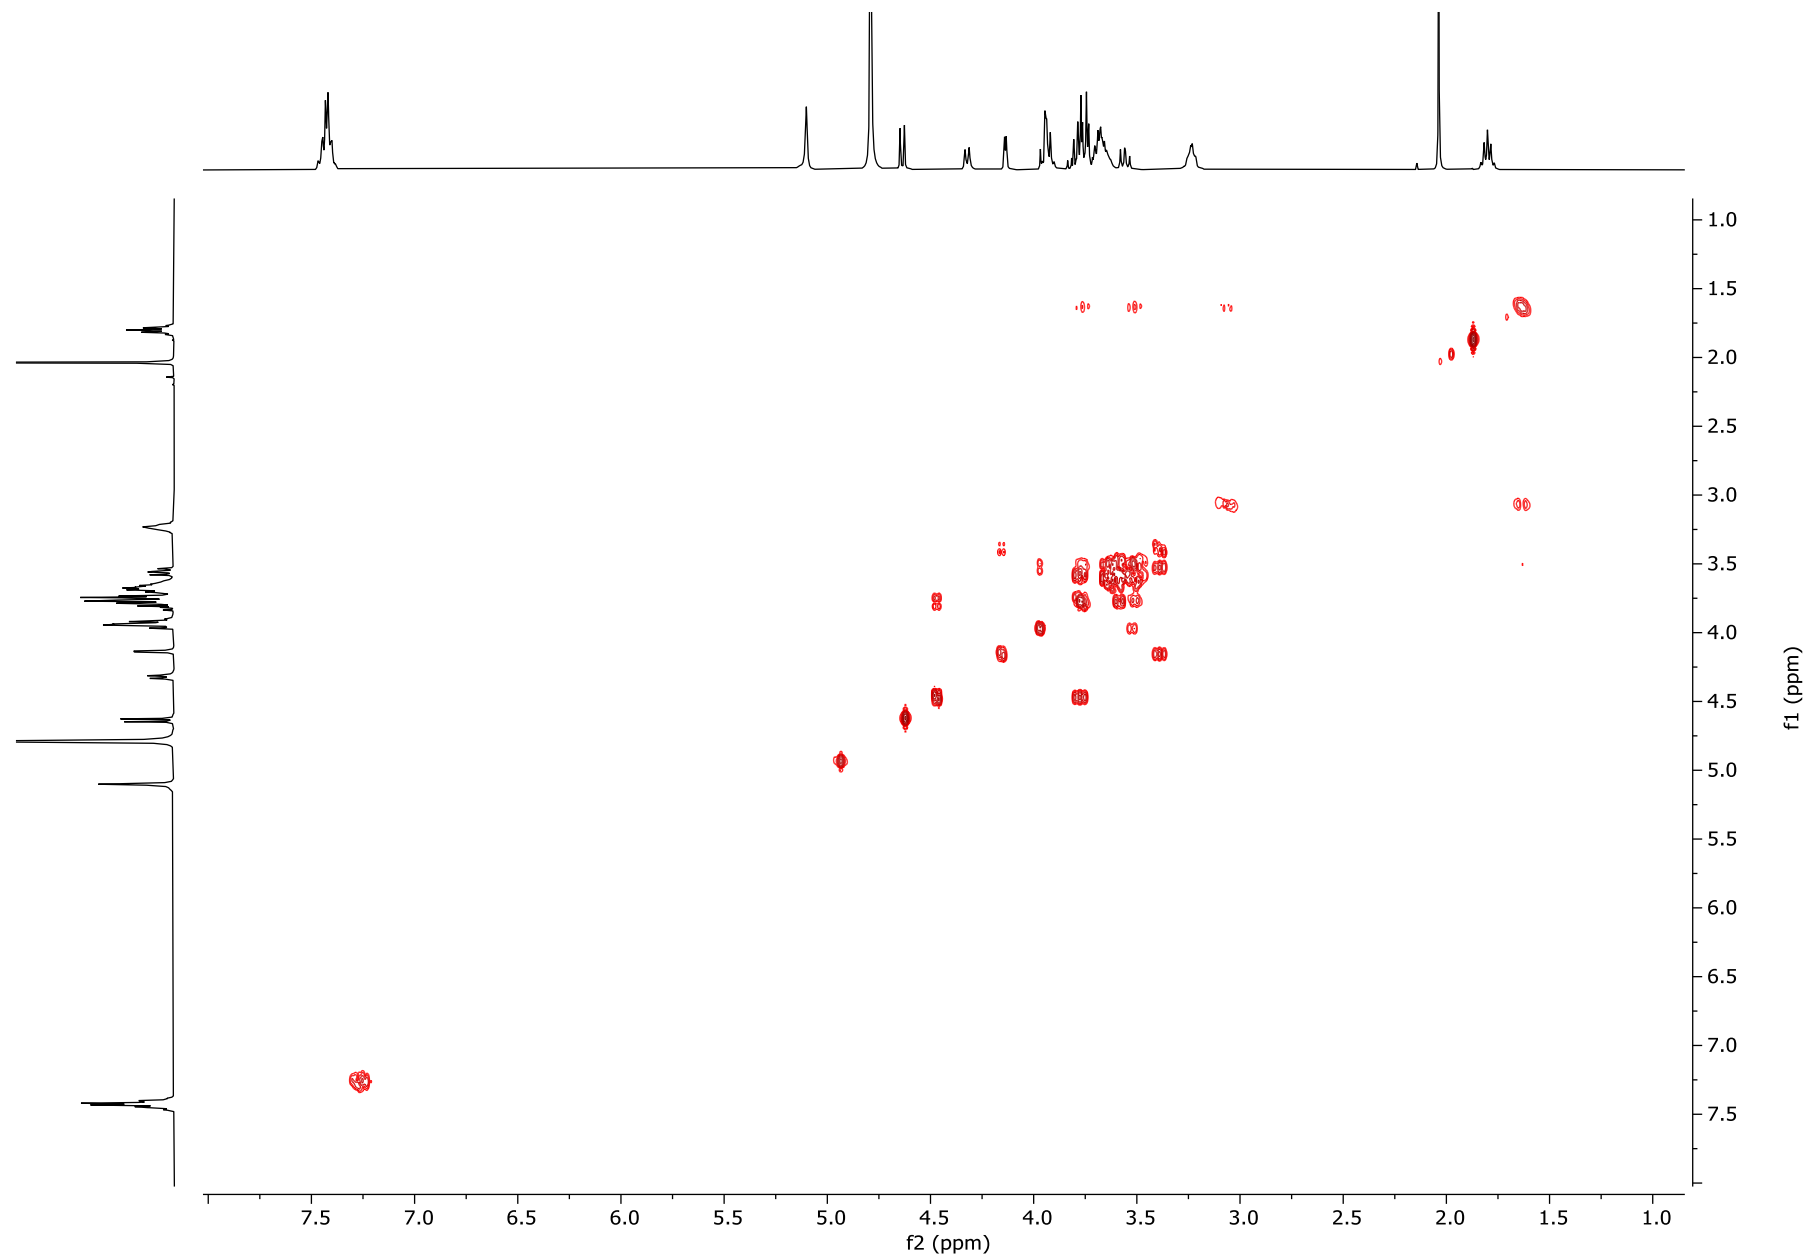

$^1\text{H}$ - $^{13}\text{C}$  HSQC NMR Spectra (400 MHz,  $\text{D}_2\text{O}$ ) of GalNAc $\beta$ 3Gal $\beta$ ProNHCbz (**4b**)

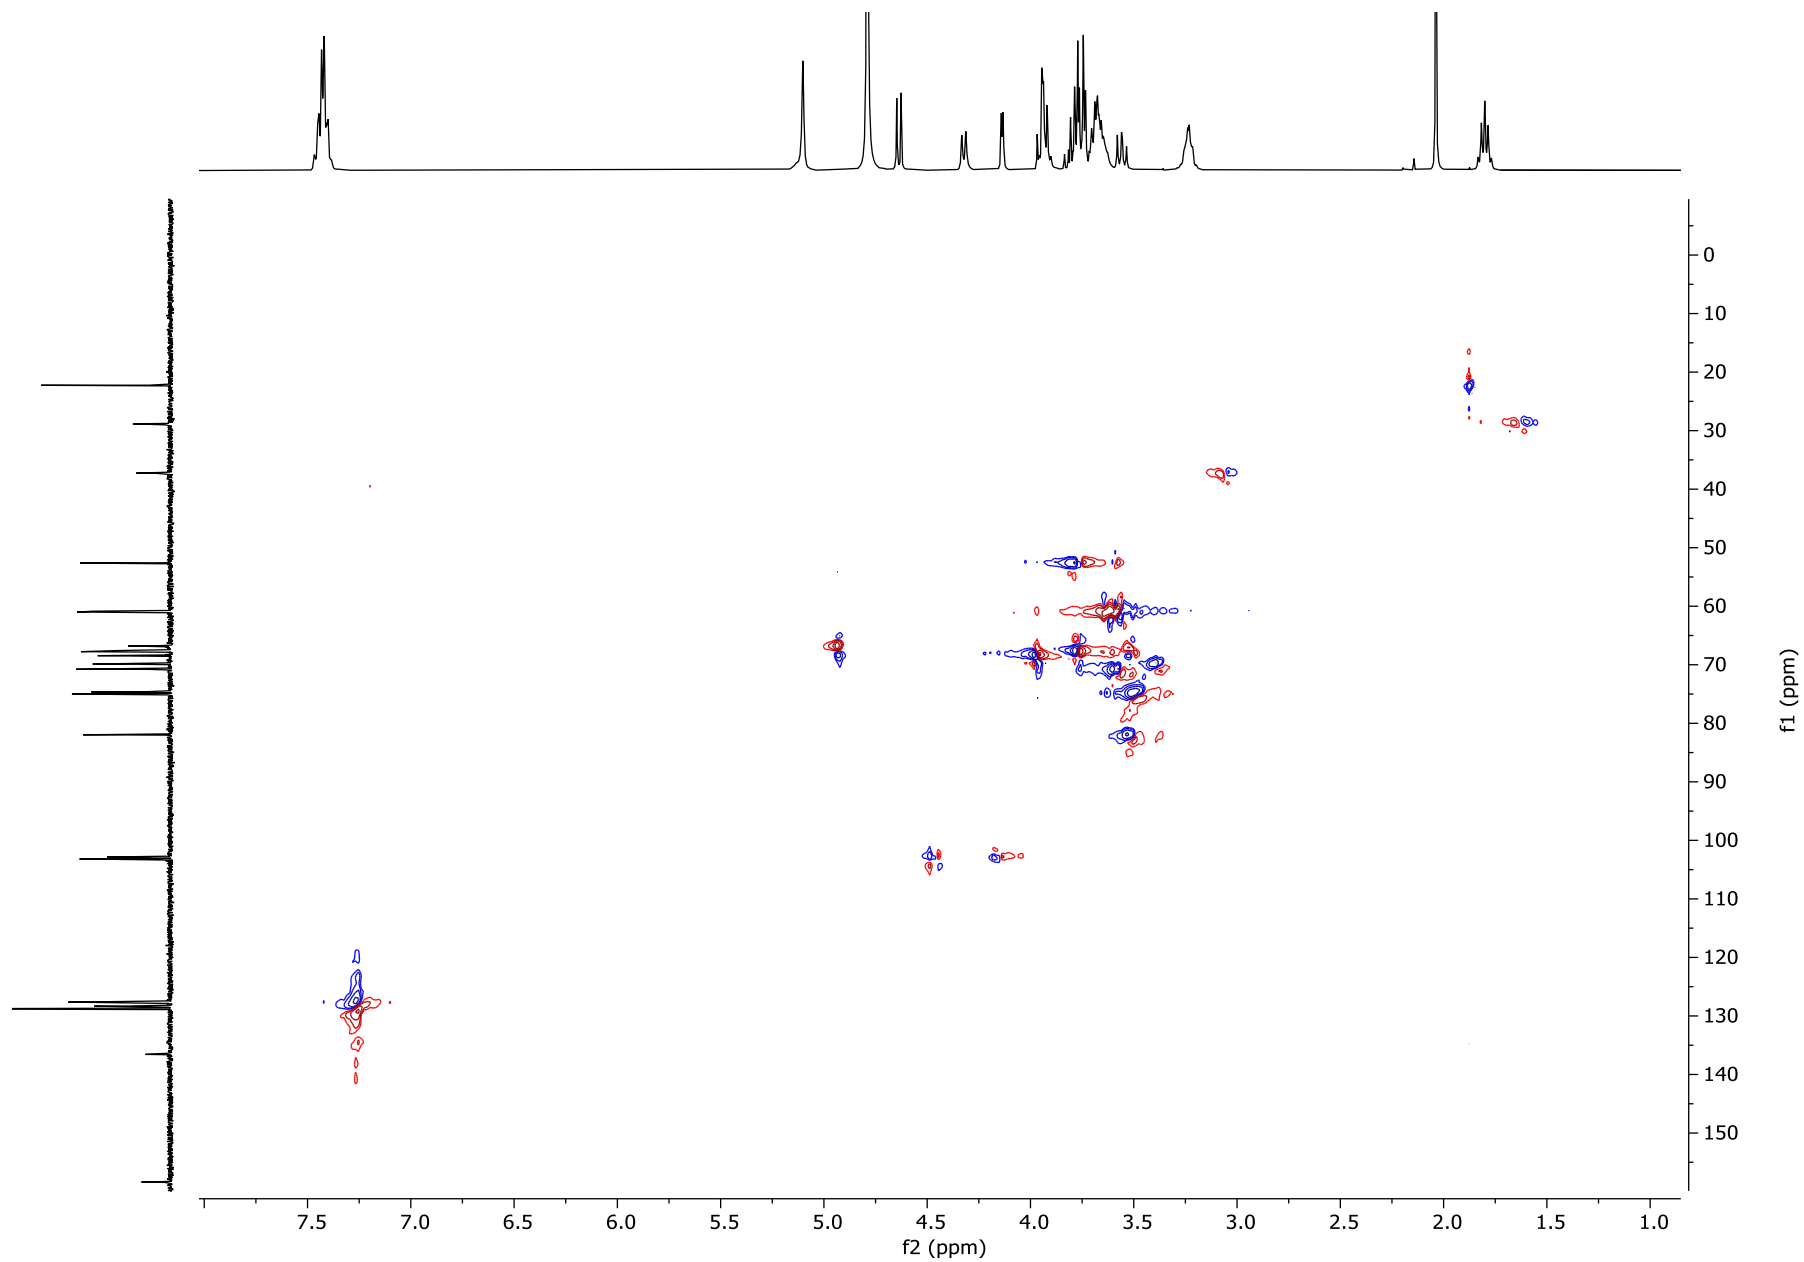

Supplement: d4ob00889h1.pdf [file d4ob00889h1.pdf]
